# Supplementary material for: Sixty years of radiocarbon dioxide measurements at Wellington, New Zealand 1954–2014
Source: Copernicus journal article supplement (doi:10.5194/acp-2016-1110), 2016-12-20
Supplement: Supplementary file 1 [file acp-2016-1110-supplement.zip]

Archive with 2 entries (2 files):
- BHD_Supp_V6.pdf
- WLG_14CO2_Datasets_20161209.xlsx
