# Supplementary material for: Sixty years of radiocarbon dioxide measurements at Wellington, New Zealand 1954–2014
Source: Copernicus journal article supplement (doi:10.5194/acp-2016-1110), 2016-12-20
Supplement: Supplementary file 1 [file WLG_14CO2_Datasets_20161209.xlsx]

## Sheet: WLG_FINAL_SCREENED_DATA
WLG 14CO2 FINAL SCREENED DATA
This sheet contains the final screened WLG dataset results and sampling information
This sheet contains only the data points which are deemed to be valid for the WLG background record
Users should refer to Turnbull et al., (in press) and associated supplementary material for details of sampling methods
This work must be cited appropriately in any publication, presentation or other use or distribution of the dataset. Please contact Jocelyn Turnbull (j.turnbull@gns.cri.nz) prior to use.
SITE	NZPREFIX	NZ	DATE_ST	DATE_END	DAYS_EXP	DATE_COLL	DECIMAL_DATE	DELTA13C_IRMS	DELTA14C	DELTA14C_ERR	F14C	F14C_ERR	FLAG	METH_VESSEL	METH_COLL
MAK	NZ	2100	1954-11-24	1954-12-30	36	1954-12-15	1954.95	-9.4	-17.7	7.5	0.9829	0.0075	...	tray	NaOH_static
MAK	NZ	2099	1955-02-22	NA	-999	1955-02-22	1955.14	-9.4	-10.1	7.6	0.9905	0.0076	...	tray	NaOH_static
MAK	NZ	2098	1955-04-14	NA	-999	1955-04-14	1955.28	-9.4	-1.4	7.6	0.9992	0.0076	...	tray	NaOH_static
MAK	NZ	2097	1955-05-10	NA	-999	1955-05-10	1955.35	-24.9	-10.4	7.6	0.9903	0.0076	..D	tray	NaOH_static
MAK	NZ	2102	1955-06-03	1955-07-05	32	1955-06-15	1955.45	-9.4	-4.2	5.8	0.9965	0.0058	..D	tray	NaOH_static
MAK	NZ	2103	1955-08-19	1955-09-26	38	1955-09-07	1955.68	-8.8	-11.8	3.9	0.9888	0.0039	..D	tray	NaOH_static
MAK	NZ	2104	1955-11-10	1956-01-18	69	1955-12-15	1955.95	-8.8	0.1	5.4	1.0008	0.0054	...	tray	NaOH_static
MAK	NZ	2105	1956-01-18	1956-04-13	86	1956-02-19	1956.14	-8.8	5.6	3.9	1.0063	0.0039	..D	tray	NaOH_static
MAK	NZ	2107	1956-04-13	1956-08-07	116	1956-06-15	1956.45	-25	37.8	4.9	1.0387	0.0049	..D	tray	NaOH_static
MAK	NZ	2108	1956-09-18	1956-10-02	14	1956-09-25	1956.73	-25.8	10.1	4.8	1.011	0.0048	...	tray	NaOH_static
MAK	NZ	2110	1956-09-18	1956-12-12	85	1956-10-21	1956.8	-9	13.6	4.8	1.0145	0.0048	...	tray	NaOH_static
MAK	NZ	2109	1956-09-03	1956-12-21	109	1956-10-22	1956.81	-9.2	18.1	4.8	1.019	0.0048	...	tray	NaOH_static
MAK	NZ	2111	1956-12-12	1957-03-20	98	1957-01-27	1957.07	-9	18.3	3.8	1.0192	0.0038	...	tray	NaOH_static
MAK	NZ	2112	1956-12-12	1957-03-20	98	1957-01-27	1957.07	-10.1	24.9	3.8	1.0258	0.0038	...	tray	NaOH_static
MAK	NZ	2113	1957-03-20	1957-06-04	76	1957-04-28	1957.32	-10.6	39	4.9	1.0399	0.0049	...	tray	NaOH_static
MAK	NZ	2114	1957-03-20	1957-06-04	76	1957-04-28	1957.32	-9.8	41.5	4.9	1.0424	0.0049	...	tray	NaOH_static
MAK	NZ	2115	1957-05-14	1957-05-30	16	1957-05-22	1957.39	-24.8	16.6	4.8	1.0175	0.0048	...	tray	NaOH_static
MAK	NZ	2120	1957-06-04	1957-09-11	99	1957-07-23	1957.56	-9.4	44.8	4.2	1.0458	0.0042	..D	tray	NaOH_static
MAK	NZ	2118	1957-06-04	1957-09-11	99	1957-07-23	1957.56	-9.6	43.3	4.2	1.0443	0.0042	..D	tray	NaOH_static
MAK	NZ	2116	1957-08-16	1957-09-06	21	1957-08-27	1957.65	-24.8	51.3	4.2	1.0523	0.0042	..D	tray	NaOH_static
MAK	NZ	2122	1957-09-11	1957-10-29	48	1957-10-09	1957.77	-12.5	46.2	5.3	1.0472	0.0053	..D	tray	NaOH_static
MAK	NZ	2124	1957-09-11	1957-12-29	109	1957-11-06	1957.85	-9.7	51.6	4.8	1.0526	0.0048	...	tray	NaOH_static
MAK	NZ	2123	1957-10-29	1957-12-29	61	1957-11-26	1957.9	-8.8	62	4.9	1.063	0.0049	...	tray	NaOH_static
MAK	NZ	2126	1958-01-29	1958-05-09	100	1958-03-18	1958.21	-9.4	67.5	4.3	1.0685	0.0043	...	tray	NaOH_static
MAK	NZ	2125	1958-01-29	1958-05-09	100	1958-03-18	1958.21	-10.1	76.2	4.3	1.0772	0.0043	...	tray	NaOH_static
MAK	NZ	2128	1958-07-01	1958-07-08	7	1958-07-04	1958.51	-25	81	4.2	1.0821	0.0042	..D	tray	NaOH_static
MAK	NZ	2127	1958-05-22	1958-06-03	12	1958-08-28	1958.66	-25	77.7	4.2	1.0788	0.0042	..D	tray	NaOH_static
MAK	NZ	2129	1958-09-22	1958-10-06	14	1958-09-29	1958.74	-24.8	93.9	3.8	1.0951	0.0038	...	tray	NaOH_static
MAK	NZ	2130	1958-11-05	1958-11-14	9	1958-11-09	1958.86	-24.6	116.9	5.1	1.1181	0.0051	..D	tray	NaOH_static
MAK	NZ	2131	1958-12-15	2005-12-31	16	1958-12-23	1958.98	-25	110.1	4.3	1.1113	0.0043	...	tray	NaOH_static
MAK	NZ	2132	1959-01-13	1959-01-22	9	1959-01-17	1959.05	-25	121.1	4.2	1.1223	0.0042	...	tray	NaOH_static
MAK	NZ	2133	1959-02-23	1959-03-11	16	1959-03-02	1959.17	-25	126	5.2	1.1272	0.0052	...	tray	NaOH_static
MAK	NZ	2134	1959-04-07	1959-04-15	8	1959-04-11	1959.28	-25.1	137.2	4.2	1.1384	0.0042	...	tray	NaOH_static
MAK	NZ	2136	1959-05-19	1959-06-08	20	1959-06-01	1959.42	-25.9	132.7	4.2	1.134	0.0042	..D	tray	NaOH_static
MAK	NZ	2135	1959-07-10	1959-07-17	7	1959-07-13	1959.53	-25.2	150	4.3	1.1514	0.0043	..D	tray	NaOH_static
MAK	NZ	2137	1959-08-13	NA	-999	1959-08-13	1959.62	-25	141.9	5.1	1.1432	0.0051	..D	tray	NaOH_static
MAK	NZ	2138	1959-10-01	NA	-999	1959-10-01	1959.75	-26.4	164.6	5.2	1.166	0.0052	...	tray	NaOH_static
MAK	NZ	2139	1959-11-13	2005-11-25	12	1959-11-19	1959.88	-24.5	171.4	5.2	1.1728	0.0052	...	tray	NaOH_static
MAK	NZ	2140	1959-12-16	2005-12-22	6	1959-12-19	1959.97	-25	181.7	5.3	1.1831	0.0053	...	tray	NaOH_static
MAK	NZ	2141	1960-01-19	1960-01-26	7	1960-01-21	1960.06	-25.2	181.8	5.3	1.1832	0.0053	...	tray	NaOH_static
MAK	NZ	2142	1960-04-11	1960-04-19	8	1960-04-14	1960.29	-23.4	187.9	5.3	1.1893	0.0053	...	tray	NaOH_static
MAK	NZ	2143	1960-07-11	1960-07-18	7	1960-07-14	1960.53	-24	187.3	5.3	1.1888	0.0053	..D	tray	NaOH_static
MAK	NZ	2145	1960-09-05	1960-09-12	7	1960-09-08	1960.69	-22.8	193.6	5.3	1.1951	0.0053	..D	tray	NaOH_static
MAK	NZ	2144	1960-09-26	1960-10-04	8	1960-09-29	1960.74	-22.5	195.8	5.4	1.1974	0.0054	..D	tray	NaOH_static
MAK	NZ	2147	1960-11-13	NA	-999	1960-11-13	1960.87	-26.4	198.4	5.4	1.2	0.0054	...	tray	NaOH_static
MAK	NZ	2146	1960-12-16	1960-12-23	7	1960-12-19	1960.97	-24.5	193.7	5.3	1.1953	0.0053	...	tray	NaOH_static
MAK	NZ	2148	1961-01-16	1961-01-25	9	1961-01-20	1961.05	-25.5	194.9	5.4	1.1965	0.0054	...	tray	NaOH_static
MAK	NZ	2149	1961-03-06	1961-03-13	7	1961-03-10	1961.19	-24.9	207.1	6.2	1.2087	0.0062	...	tray	NaOH_static
MAK	NZ	2150	1961-04-10	1961-04-17	7	1961-04-14	1961.28	-25	201.9	5.4	1.2035	0.0054	...	tray	NaOH_static
MAK	NZ	2151	1961-05-22	1961-05-29	7	1961-05-26	1961.4	-26.3	196.6	5.4	1.1982	0.0054	..D	tray	NaOH_static
MAK	NZ	2263	1961-07-03	1961-07-11	8	1961-07-06	1961.51	-25.1	198.4	11.3	1.2001	0.0113	..D	tray	NaOH_static
MAK	NZ	2262	1961-08-15	1961-08-22	7	1961-08-19	1961.63	-25.3	197.9	7.5	1.1996	0.0075	...	tray	NaOH_static
MAK	NZ	2152	1961-09-29	1961-10-06	7	1961-10-03	1961.75	-24.7	182.9	5.9	1.1845	0.0059	..D	tray	NaOH_static
MAK	NZ	2264	1961-11-07	1961-11-15	8	1961-11-11	1961.86	-23.8	237.2	11.6	1.239	0.0116	...	tray	NaOH_static
MAK	NZ	2265	1961-12-15	1961-12-22	7	1961-12-19	1961.97	-25.1	227.3	11.6	1.2291	0.0116	...	tray	NaOH_static
MAK	NZ	2268	1962-01-15	1962-01-23	8	1962-01-19	1962.05	-24.6	197.4	6	1.1992	0.006	...	tray	NaOH_static
MAK	NZ	2266	1962-02-26	1962-03-05	7	1962-03-02	1962.17	-23.4	207.3	9	1.2091	0.009	...	tray	NaOH_static
MAK	NZ	2267	1962-04-19	1962-05-01	12	1962-04-25	1962.31	-24.5	214.3	6.2	1.2161	0.0062	...	tray	NaOH_static
MAK	NZ	2269	1962-05-22	1962-05-29	7	1962-05-25	1962.4	-24.5	189.4	11.3	1.1911	0.0113	...	tray	NaOH_static
MAK	NZ	2155	1962-09-24	1962-10-02	8	1962-09-28	1962.74	-24.5	233.5	5.5	1.2354	0.0055	...	tray	NaOH_static
MAK	NZ	2270	1962-11-05	1962-11-13	8	1962-11-09	1962.86	-24	250.5	7.3	1.2524	0.0073	..D	tray	NaOH_static
MAK	NZ	2153	1962-12-17	1962-12-24	7	1962-12-20	1962.97	-28.4	266.6	5	1.2686	0.005	...	tray	NaOH_static
MAK	NZ	2154	1963-01-14	1963-01-22	8	1963-01-18	1963.05	-25.9	265.5	4.9	1.2675	0.0049	...	tray	NaOH_static
MAK	NZ	2156	1963-03-01	NA	-999	1963-03-01	1963.16	-23.6	269.7	5.1	1.2717	0.0051	...	tray	NaOH_static
MAK	NZ	2159	1963-03-01	NA	-999	1963-03-01	1963.16	-23.6	266.3	4.9	1.2684	0.0049	..D	tray	NaOH_static
MAK	NZ	2160	1963-04-09	1963-04-19	10	1963-04-14	1963.28	-23.5	280.9	4.9	1.2829	0.0049	...	tray	NaOH_static
MAK	NZ	2157	1963-04-09	1963-04-19	10	1963-04-14	1963.28	-23.5	284.3	5.1	1.2863	0.0051	...	tray	NaOH_static
MAK	NZ	2163	1963-05-22	1963-05-29	7	1963-05-26	1963.4	-24.2	313.2	5.4	1.3153	0.0054	...	tray	NaOH_static
MAK	NZ	2161	1963-07-02	1963-07-09	7	1963-07-06	1963.51	-24.7	331	5.5	1.3332	0.0055	..D	tray	NaOH_static
MAK	NZ	2162	1963-08-13	1963-08-20	7	1963-08-17	1963.63	-24.7	355.5	5.7	1.3578	0.0057	..D	tray	NaOH_static
MAK	NZ	2164	1963-09-24	1963-10-01	7	1963-09-29	1963.74	-23.7	405.1	5.4	1.4075	0.0054	..D	tray	NaOH_static
MAK	NZ	2165	1963-11-06	1963-11-13	7	1963-11-10	1963.86	-24.7	374.8	5.6	1.3771	0.0056	...	tray	NaOH_static
MAK	NZ	2166	1963-12-16	1963-12-23	7	1963-12-20	1963.97	-24.7	429.5	5.3	1.4319	0.0053	...	tray	NaOH_static
MAK	NZ	2167	1964-01-13	1964-01-21	8	1964-01-17	1964.05	-23.1	445.7	5.4	1.4482	0.0054	...	tray	NaOH_static
MAK	NZ	2168	1964-02-25	1964-03-03	7	1964-03-01	1964.17	-22.8	472.5	5.9	1.475	0.0059	...	tray	NaOH_static
MAK	NZ	2169	1964-04-07	1964-04-15	8	1964-04-11	1964.28	-23.7	500.2	6	1.5028	0.006	..D	tray	NaOH_static
MAK	NZ	2170	1964-05-19	1964-05-26	7	1964-05-23	1964.39	-25.9	498.2	5.8	1.5008	0.0058	..D	tray	NaOH_static
MAK	NZ	2171	1964-06-29	1964-07-06	7	1964-07-03	1964.5	-24.7	542.3	5.8	1.545	0.0058	..D	tray	NaOH_static
MAK	NZ	2173	1964-08-11	1964-08-17	6	1964-08-15	1964.62	-24.6	567.5	6.2	1.5703	0.0062	..D	tray	NaOH_static
MAK	NZ	2172	1964-09-29	1964-10-06	7	1964-10-03	1964.76	-25.4	506.9	5.8	1.5096	0.0058	..D	tray	NaOH_static
MAK	NZ	2174	1964-11-02	1964-11-10	8	1964-11-06	1964.85	-24.7	621.9	6.5	1.6248	0.0065	...	tray	NaOH_static
MAK	NZ	2175	1964-12-14	1964-12-21	7	1964-12-17	1964.96	-19.9	615.8	6.4	1.6187	0.0064	..D	tray	NaOH_static
MAK	NZ	2271	1965-01-11	1965-01-18	7	1965-01-15	1965.04	-22	689.4	12.8	1.6925	0.0128	...	tray	NaOH_static
MAK	NZ	2176	1965-02-22	1965-03-03	9	1965-02-27	1965.16	-23.6	633.6	6.5	1.6366	0.0065	...	tray	NaOH_static
MAK	NZ	2178	1965-04-05	1965-04-13	8	1965-04-08	1965.27	-23.9	634	6.3	1.637	0.0063	..D	tray	NaOH_static
MAK	NZ	2177	1965-05-17	1965-05-24	7	1965-05-21	1965.38	-21.4	615.1	6.2	1.6181	0.0062	..D	tray	NaOH_static
MAK	NZ	2180	1965-06-28	1965-07-05	7	1965-07-02	1965.5	-25.7	694.6	6.5	1.6978	0.0065	..D	tray	NaOH_static
MAK	NZ	2179	1965-08-09	1965-08-16	7	1965-08-13	1965.62	-23.9	614.1	6.2	1.6172	0.0062	...	tray	NaOH_static
MAK	NZ	2181	1965-09-20	1965-09-27	7	1965-09-24	1965.73	-25.2	634.2	6.5	1.6374	0.0065	...	tray	NaOH_static
MAK	NZ	2182	1965-11-02	1965-11-09	7	1965-11-06	1965.85	-18.1	625.8	6.5	1.6289	0.0065	..D	tray	NaOH_static
MAK	NZ	2183	1965-12-17	1965-12-30	13	1965-12-24	1965.98	-24.9	634.4	6.3	1.6375	0.0063	...	tray	NaOH_static
MAK	NZ	2184	1966-01-31	1966-02-07	7	1966-02-04	1966.09	-24.6	647.3	6.4	1.6505	0.0064	...	tray	NaOH_static
MAK	NZ	2185	1966-03-02	1966-03-14	12	1966-03-08	1966.18	-26.4	646.5	6.4	1.6497	0.0064	...	tray	NaOH_static
MAK	NZ	2186	1966-03-29	1966-04-06	8	1966-04-02	1966.25	-23.9	631.8	5.9	1.635	0.0059	...	tray	NaOH_static
MAK	NZ	2189	1966-05-02	1966-06-07	66	1966-05-20	1966.38	-26.1	622	6.3	1.6252	0.0063	..D	tray	NaOH_static
MAK	NZ	2188	1966-06-07	1966-06-13	6	1966-06-10	1966.44	-25	612.4	6.8	1.6156	0.0068	...	tray	NaOH_static
MAK	NZ	2187	1966-07-04	1966-07-08	4	1966-07-06	1966.51	-23.1	612.1	7.2	1.6154	0.0072	..D	tray	NaOH_static
MAK	NZ	2190	1966-08-02	1966-09-05	34	1966-08-19	1966.63	-24.8	590.9	6.1	1.5941	0.0061	..D	tray	NaOH_static
MAK	NZ	2191	1966-09-05	1966-09-12	7	1966-09-09	1966.69	-26.8	625.3	6.3	1.6286	0.0063	..D	tray	NaOH_static
MAK	NZ	2192	1966-10-03	1966-10-10	7	1966-10-07	1966.77	-23.8	614.8	6.2	1.6181	0.0062	...	tray	NaOH_static
MAK	NZ	2193	1966-11-02	1966-11-08	6	1966-11-05	1966.85	-25.1	614.9	6.6	1.6182	0.0066	...	tray	NaOH_static
MAK	NZ	2194	1966-12-07	1966-12-14	7	1966-12-11	1966.94	-24.8	627.8	6.5	1.6312	0.0065	...	tray	NaOH_static
MAK	NZ	2195	1967-01-05	1967-01-12	7	1967-01-09	1967.02	-24.6	616.4	6.4	1.6197	0.0064	...	tray	NaOH_static
MAK	NZ	2196	1967-02-20	1967-02-27	7	1967-02-24	1967.15	-23	602.9	7.2	1.6062	0.0072	...	tray	NaOH_static
MAK	NZ	2197	1967-04-04	1967-04-11	7	1967-04-08	1967.27	-23.4	608.9	6.2	1.6123	0.0062	..D	tray	NaOH_static
MAK	NZ	2198	1967-05-06	NA	-999	1967-05-06	1967.34	-23.7	596.5	6.2	1.5998	0.0062	...	tray	NaOH_static
MAK	NZ	2273	1967-06-07	1967-06-13	6	1967-06-10	1967.44	-23.7	589.3	6.5	1.5927	0.0065	..D	tray	NaOH_static
MAK	NZ	2199	1967-07-13	1967-07-24	11	1967-07-19	1967.55	-24.4	571.4	6.1	1.5747	0.0061	..D	tray	NaOH_static
MAK	NZ	2200	1967-10-02	1967-10-10	8	1967-10-06	1967.76	-23.1	574.9	6.1	1.5783	0.0061	..D	tray	NaOH_static
MAK	NZ	2274	1967-11-06	1967-11-14	8	1967-11-10	1967.86	-25.7	586	8.3	1.5894	0.0083	...	tray	NaOH_static
MAK	NZ	2201	1967-12-05	1967-12-12	7	1967-12-09	1967.94	-24.4	579.6	6.1	1.5831	0.0061	...	tray	NaOH_static
MAK	NZ	2202	1968-01-08	1968-01-17	9	1968-01-13	1968.03	-23.9	583	6.1	1.5865	0.0061	...	tray	NaOH_static
MAK	NZ	2203	1968-02-07	1968-02-15	8	1968-02-11	1968.11	-24.5	582.5	6.1	1.5859	0.0061	...	tray	NaOH_static
MAK	NZ	2204	1968-03-04	1968-03-18	14	1968-03-11	1968.19	-22.5	572.8	5.7	1.5762	0.0057	...	tray	NaOH_static
MAK	NZ	2205	1968-04-04	1968-04-08	4	1968-04-06	1968.26	-23.9	547.6	5.6	1.551	0.0056	...	tray	NaOH_static
MAK	NZ	2206	1968-05-31	NA	-999	1968-05-31	1968.41	-24.8	560.4	6	1.5639	0.006	..D	tray	NaOH_static
MAK	NZ	2207	1968-06-03	1968-06-10	7	1968-06-07	1968.43	-24.6	561.6	6	1.5651	0.006	..D	tray	NaOH_static
MAK	NZ	2208	1968-07-01	1968-07-08	7	1968-07-05	1968.51	-26.3	550.5	6	1.5539	0.006	..D	tray	NaOH_static
MAK	NZ	2209	1968-08-05	1968-08-12	7	1968-08-09	1968.61	-24.7	538.2	5.9	1.5416	0.0059	..D	tray	NaOH_static
MAK	NZ	2210	1968-08-26	1968-09-02	7	1968-08-30	1968.66	-23.8	535.6	5.9	1.5391	0.0059	..D	tray	NaOH_static
MAK	NZ	2211	1968-09-02	1968-09-09	7	1968-09-06	1968.68	-23.7	531.6	5.9	1.5351	0.0059	..D	tray	NaOH_static
MAK	NZ	2212	1968-09-30	1968-10-07	7	1968-10-04	1968.76	-24.6	532.8	5.9	1.5363	0.0059	...	tray	NaOH_static
MAK	NZ	2213	1968-10-14	1968-10-21	7	1968-10-18	1968.8	-24.7	537.7	5.9	1.5412	0.0059	..D	tray	NaOH_static
MAK	NZ	3470	1968-10-30	1968-11-04	5	1968-11-02	1968.84	-25.3	541.7	6	1.5453	0.006	..D	tray	NaOH_static
MAK	NZ	2214	1968-11-04	1968-11-11	7	1968-11-08	1968.85	-26.9	541.2	5.9	1.5447	0.0059	...	tray	NaOH_static
MAK	NZ	2215	1968-12-02	1968-12-09	7	1968-12-06	1968.93	-23.8	539.6	5.9	1.5431	0.0059	...	tray	NaOH_static
MAK	NZ	2217	1969-01-06	1969-01-13	7	1969-01-10	1969.03	-24.3	539.1	5.9	1.5426	0.0059	...	tray	NaOH_static
MAK	NZ	2216	1969-02-03	1969-02-11	8	1969-02-07	1969.1	-23.1	537.7	5.9	1.5412	0.0059	...	tray	NaOH_static
MAK	NZ	2218	1969-03-03	1969-03-12	9	1969-03-08	1969.18	-23.3	550.4	6	1.554	0.006	...	tray	NaOH_static
MAK	NZ	2222	1969-04-09	1969-04-16	7	1969-04-13	1969.28	-23.4	545.4	6	1.549	0.006	...	tray	NaOH_static
MAK	NZ	2220	1969-05-02	NA	-999	1969-05-02	1969.33	-23.1	530.3	6.1	1.5339	0.0061	..D	tray	NaOH_static
MAK	NZ	2221	1969-05-09	NA	-999	1969-05-09	1969.35	-22.8	539.5	6.1	1.5431	0.0061	..D	tray	NaOH_static
MAK	NZ	2223	1969-06-03	1969-06-10	7	1969-06-07	1969.43	-23.4	525.1	6.5	1.5287	0.0065	..D	tray	NaOH_static
MAK	NZ	2219	1969-07-07	1969-07-14	7	1969-07-11	1969.52	-23.1	526.2	5.9	1.5298	0.0059	..D	tray	NaOH_static
MAK	NZ	2224	1969-08-05	1969-08-12	7	1969-08-09	1969.6	-22.9	522.7	5.9	1.5263	0.0059	..D	tray	NaOH_static
MAK	NZ	2225	1969-09-05	NA	-999	1969-09-05	1969.68	-23.5	545	6	1.5487	0.006	..D	tray	NaOH_static
MAK	NZ	2226	1969-10-10	NA	-999	1969-10-10	1969.77	-25.2	531.2	5.9	1.5349	0.0059	...	tray	NaOH_static
MAK	NZ	2228	1969-12-05	NA	-999	1969-12-05	1969.93	-22.5	510.2	5.8	1.5138	0.0058	...	tray	NaOH_static
MAK	NZ	2229	1970-01-05	1970-01-12	7	1970-01-09	1970.02	-22.5	510.2	5.8	1.5138	0.0058	...	tray	NaOH_static
MAK	NZ	2230	1970-03-06	NA	-999	1970-03-06	1970.18	-22.5	535.3	5.9	1.5391	0.0059	...	tray	NaOH_static
MAK	NZ	2232	1970-04-06	1970-04-13	7	1970-04-10	1970.27	-22.1	520.4	5.9	1.5241	0.0059	...	tray	NaOH_static
MAK	NZ	2231	1970-05-05	1970-05-12	7	1970-05-09	1970.35	-22.4	513.5	5.8	1.5172	0.0058	...	tray	NaOH_static
MAK	NZ	2233	1970-06-06	NA	-999	1970-06-06	1970.43	-23.2	516.1	5.9	1.5199	0.0059	..D	tray	NaOH_static
MAK	NZ	2234	1970-07-10	NA	-999	1970-07-10	1970.52	-23.8	506	5.8	1.5098	0.0058	..D	tray	NaOH_static
MAK	NZ	2235	1970-08-03	1970-08-10	7	1970-08-07	1970.6	-23.6	497.5	5.2	1.5012	0.0052	..D	tray	NaOH_static
MAK	NZ	2236	1970-09-07	1970-09-14	7	1970-09-11	1970.69	-24.5	508	5.8	1.5118	0.0058	...	tray	NaOH_static
MAK	NZ	2237	1970-10-06	1970-10-13	7	1970-10-10	1970.77	-24.3	498.6	5.8	1.5024	0.0058	...	tray	NaOH_static
MAK	NZ	2238	1970-11-02	1970-11-09	7	1970-11-06	1970.85	-23.3	497.5	6	1.5013	0.006	..D	tray	NaOH_static
MAK	NZ	2239	1970-12-07	1971-01-06	30	1970-12-23	1970.98	-22.7	495.6	6	1.4994	0.006	..D	tray	NaOH_static
MAK	NZ	2240	1971-01-06	1971-01-13	7	1971-01-10	1971.03	-22.3	500.6	5.8	1.5044	0.0058	...	tray	NaOH_static
MAK	NZ	2241	1971-02-01	1971-02-09	8	1971-02-05	1971.1	-23.8	494.7	5.4	1.4985	0.0054	...	tray	NaOH_static
MAK	NZ	2242	1971-03-05	NA	-999	1971-03-05	1971.17	-24.6	508.3	5.8	1.5121	0.0058	...	tray	NaOH_static
MAK	NZ	2243	1971-04-05	1971-04-13	8	1971-04-09	1971.27	-24.8	500.9	6	1.5048	0.006	..D	tray	NaOH_static
MAK	NZ	2244	1971-05-03	1971-05-10	7	1971-05-07	1971.35	-24.9	499.6	5.8	1.5035	0.0058	..D	tray	NaOH_static
MAK	NZ	2245	1971-06-08	1971-06-14	6	1971-06-11	1971.44	-24.6	498.9	5.8	1.5028	0.0058	..D	tray	NaOH_static
MAK	NZ	2246	1971-07-05	1971-07-12	7	1971-07-09	1971.52	-25.9	494.3	6.1	1.4982	0.0061	..D	tray	NaOH_static
MAK	NZ	2248	1971-08-04	1971-08-11	7	1971-08-08	1971.6	-23.5	483.4	5.9	1.4872	0.0059	..D	tray	NaOH_static
MAK	NZ	2247	1971-09-10	NA	-999	1971-09-10	1971.69	-24.5	478.8	6.6	1.4827	0.0066	..D	tray	NaOH_static
MAK	NZ	2249	1971-10-04	1971-10-18	14	1971-10-10	1971.77	-24	492.6	5.9	1.4965	0.0059	..D	tray	NaOH_static
MAK	NZ	2251	1971-12-03	NA	-999	1971-12-03	1971.92	-24.8	479.3	5.9	1.4832	0.0059	...	tray	NaOH_static
MAK	NZ	2252	1972-01-09	NA	-999	1972-01-09	1972.02	-23.9	484.5	5.4	1.4885	0.0054	...	tray	NaOH_static
MAK	NZ	2253	1972-02-02	1972-02-10	8	1972-02-06	1972.1	-24.7	491.6	5.9	1.4956	0.0059	...	tray	NaOH_static
MAK	NZ	2282	1972-03-06	1972-03-27	21	1972-03-17	1972.21	-22.5	474.8	10.8	1.4788	0.0108	...	tray	NaOH_static
MAK	NZ	2250	1972-03-27	1972-04-04	8	1972-03-31	1972.25	-23.8	482.3	5.4	1.4863	0.0054	..D	tray	NaOH_static
MAK	NZ	2254	1972-04-10	1972-05-04	24	1972-04-20	1972.3	-22.6	468.1	5.3	1.472	0.0053	...	tray	NaOH_static
MAK	NZ	2286	1972-05-01	1972-05-08	7	1972-05-04	1972.34	-22.9	469.5	7.5	1.4734	0.0075	..D	tray	NaOH_static
MAK	NZ	2287	1972-06-10	NA	-999	1972-06-10	1972.44	-24.4	470	7.5	1.474	0.0075	..D	tray	NaOH_static
MAK	NZ	2288	1972-07-07	NA	-999	1972-07-07	1972.52	-24	466	7.5	1.47	0.0075	..D	tray	NaOH_static
MAK	NZ	2289	1972-09-01	NA	-999	1972-09-01	1972.67	-24.7	450.4	7.4	1.4544	0.0074	..D	tray	NaOH_static
MAK	NZ	2283	1972-10-02	1972-10-11	9	1972-10-07	1972.77	-24.4	450	9.6	1.454	0.0096	..D	tray	NaOH_static
MAK	NZ	2284	1972-11-06	1972-11-13	7	1972-11-13	1972.87	-24.2	450	4.6	1.454	0.0046	..D	tray	NaOH_static
MAK	NZ	2285	1972-12-08	NA	-999	1972-12-08	1972.94	-24.9	447.3	6.8	1.4513	0.0068	...	tray	NaOH_static
MAK	NZ	2290	1973-01-03	1973-01-10	7	1973-01-06	1973.02	-21.4	454.1	4.6	1.4582	0.0046	..D	tray	NaOH_static
MAK	NZ	2291	1973-02-10	NA	-999	1973-02-10	1973.11	-24.3	454	7.4	1.4581	0.0074	..D	tray	NaOH_static
MAK	NZ	2255	1973-03-09	NA	-999	1973-03-09	1973.18	-23.6	442.8	4.8	1.4469	0.0048	...	tray	NaOH_static
MAK	NZ	2256	1973-07-02	1973-07-09	7	1973-07-06	1973.51	-24.7	435.1	5.4	1.4392	0.0054	..D	tray	NaOH_static
MAK	NZ	2257	1973-08-11	NA	-999	1973-08-11	1973.61	-24.5	427.2	4.8	1.4313	0.0048	..D	tray	NaOH_static
MAK	NZ	2258	1973-09-07	NA	-999	1973-09-07	1973.68	-24.4	415.8	5.3	1.4199	0.0053	..D	tray	NaOH_static
MAK	NZ	2259	1973-10-06	NA	-999	1973-10-06	1973.76	-24.1	426	4.8	1.4301	0.0048	...	tray	NaOH_static
MAK	NZ	2260	1973-11-05	1973-11-12	7	1973-11-09	1973.86	-23.4	434.3	5.2	1.4385	0.0052	...	tray	NaOH_static
MAK	NZ	2261	1973-12-07	NA	-999	1973-12-07	1973.93	-23.3	417.3	4.4	1.4214	0.0044	..D	tray	NaOH_static
MAK	NZ	3565	1974-01-11	NA	-999	1974-01-11	1974.03	-23.2	412.8	4.9	1.417	0.0049	...	tray	NaOH_static
MAK	NZ	3566	1974-02-01	NA	-999	1974-02-01	1974.09	-23	405.1	4.5	1.4092	0.0045	...	tray	NaOH_static
MAK	NZ	3567	1974-03-04	1974-03-11	7	1974-03-08	1974.18	-22.2	418.7	4.6	1.4228	0.0046	..D	tray	NaOH_static
MAK	NZ	3568	1974-04-01	1974-04-07	6	1974-04-04	1974.26	-23	417.4	4.6	1.4215	0.0046	..D	tray	NaOH_static
MAK	NZ	3572	1974-05-06	1974-05-13	7	1974-05-10	1974.35	-23.3	386.9	4.5	1.391	0.0045	..D	tray	NaOH_static
MAK	NZ	4052	1974-06-04	1974-06-10	6	1974-06-07	1974.43	-23.3	359.6	4.6	1.3636	0.0046	..D	tray	NaOH_static
MAK	NZ	4057	1974-07-06	NA	-999	1974-07-06	1974.51	-23.3	394.4	4.7	1.3986	0.0047	..D	tray	NaOH_static
MAK	NZ	4058	1974-08-07	NA	-999	1974-08-07	1974.6	-24.8	392.4	5.2	1.3965	0.0052	..D	tray	NaOH_static
MAK	NZ	4062	1974-09-06	NA	-999	1974-09-06	1974.68	-23.4	405.1	4.7	1.4093	0.0047	..D	tray	NaOH_static
MAK	NZ	3848	1974-10-05	NA	-999	1974-10-05	1974.76	-23.2	398.7	6.4	1.4029	0.0064	...	tray	NaOH_static
MAK	NZ	4065	1974-11-08	NA	-999	1974-11-08	1974.85	-22.8	401.8	4.7	1.406	0.0047	..D	tray	NaOH_static
MAK	NZ	4074	1974-12-08	NA	-999	1974-12-08	1974.94	-23.4	393.7	4.7	1.398	0.0047	...	tray	NaOH_static
MAK	NZ	4076	1975-01-10	NA	-999	1975-01-10	1975.03	-22.2	396.3	4.7	1.4005	0.0047	...	tray	NaOH_static
MAK	NZ	4078	1975-02-07	NA	-999	1975-02-07	1975.1	-23.4	399	5.2	1.4032	0.0052	...	tray	NaOH_static
MAK	NZ	4083	1975-03-07	NA	-999	1975-03-07	1975.18	-23.3	400.6	4.5	1.4048	0.0045	...	tray	NaOH_static
MAK	NZ	4088	1975-04-05	NA	-999	1975-04-05	1975.26	-23.4	397.6	4.5	1.4019	0.0045	..D	tray	NaOH_static
MAK	NZ	4090	1975-05-10	NA	-999	1975-05-10	1975.35	-23.2	389.2	5	1.3935	0.005	..D	tray	NaOH_static
MAK	NZ	4092	1975-06-09	1975-07-01	22	1975-06-20	1975.47	-23.9	384.4	4.5	1.3886	0.0045	..D	tray	NaOH_static
MAK	NZ	4094	1975-07-01	1975-07-18	17	1975-07-09	1975.52	-23.1	377.4	4.5	1.3817	0.0045	..D	tray	NaOH_static
MAK	NZ	4108	1975-08-10	NA	-999	1975-08-10	1975.61	-24.9	378.2	5.1	1.3824	0.0051	..D	tray	NaOH_static
MAK	NZ	4110	1975-09-01	1975-09-25	24	1975-09-12	1975.7	-26.2	367.6	5.1	1.3719	0.0051	..D	tray	NaOH_static
MAK	NZ	4121	1975-09-26	1975-10-06	10	1975-10-03	1975.75	-23.6	354	11.8	1.3582	0.0118	...	tray	NaOH_static
MAK	NZ	4119	1975-10-06	1975-10-13	7	1975-10-10	1975.77	-22.4	365.4	4.6	1.3697	0.0046	..D	tray	NaOH_static
MAK	NZ	4122	1975-11-11	1975-11-20	10	1975-11-15	1975.87	-23	363.9	4.9	1.3681	0.0049	..D	tray	NaOH_static
MAK	NZ	4124	1975-12-05	NA	-999	1975-12-05	1975.93	-23.6	370.8	5.1	1.3752	0.0051	...	tray	NaOH_static
MAK	NZ	4126	1976-01-05	1976-01-20	15	1976-01-13	1976.03	-23.8	373.4	5.1	1.3777	0.0051	...	tray	NaOH_static
MAK	NZ	4135	1976-02-02	1976-02-10	8	1976-02-06	1976.1	-24.3	368.1	4.6	1.3724	0.0046	...	tray	NaOH_static
MAK	NZ	4137	1976-03-02	1976-03-09	7	1976-03-06	1976.18	-23.7	366.6	4.3	1.371	0.0043	..D	tray	NaOH_static
MAK	NZ	4145	1976-04-10	NA	-999	1976-04-10	1976.27	-23	346	4.5	1.3503	0.0045	..D	tray	NaOH_static
MAK	NZ	4140	1976-05-10	NA	-999	1976-05-10	1976.36	-22.9	359.6	4.6	1.3639	0.0046	...	tray	NaOH_static
MAK	NZ	4144	1976-06-06	NA	-999	1976-06-06	1976.43	-25	361	4.6	1.3654	0.0046	..D	tray	NaOH_static
MAK	NZ	4302	1976-06-30	1976-07-07	8	1976-07-04	1976.51	-22.2	365.1	7	1.3695	0.007	..D	tray	NaOH_static
MAK	NZ	5659	1976-08-15	NA	-999	1976-08-15	1976.62	-23.9	343.3	5	1.3477	0.005	...	tray	NaOH_static
MAK	NZ	5673	1976-10-08	1976-10-15	7	1976-10-11	1976.78	-22.9	344.3	6.9	1.3486	0.0069	..D	tray	NaOH_static
MAK	NZ	5675	1976-11-04	NA	-999	1976-11-04	1976.84	-25.3	346.5	4.5	1.3509	0.0045	...	tray	NaOH_static
MAK	NZ	5678	1976-12-06	1976-12-13	7	1976-12-10	1976.94	-23.6	329.7	5	1.334	0.005	..D	tray	NaOH_static
MAK	NZ	5679	1977-01-03	NA	-999	1977-01-03	1977.01	-24.5	332.9	5	1.3373	0.005	...	tray	NaOH_static
MAK	NZ	5688	1977-02-11	NA	-999	1977-02-11	1977.11	-24.3	347.2	7.2	1.3516	0.0072	..D	tray	NaOH_static
MAK	NZ	5690	1977-03-07	1977-03-14	7	1977-03-11	1977.19	-24.7	335.5	6	1.3399	0.006	..D	tray	NaOH_static
MAK	NZ	5697	1977-05-06	NA	-999	1977-05-06	1977.34	-24.8	332.9	4.3	1.3373	0.0043	...	tray	NaOH_static
MAK	NZ	5699	1977-06-08	1977-06-15	7	1977-06-12	1977.45	-24.1	335.5	6.3	1.34	0.0063	..D	tray	NaOH_static
MAK	NZ	5700	1977-07-11	1977-07-18	7	1977-07-14	1977.53	-22.4	332.6	3.1	1.337	0.0031	..D	tray	NaOH_static
MAK	NZ	5702	1977-08-13	NA	-999	1977-08-13	1977.62	-24.1	323.7	4.4	1.3281	0.0044	..D	tray	NaOH_static
MAK	NZ	5707	1977-09-05	1977-09-12	7	1977-09-09	1977.69	-24.8	317.7	4.4	1.3221	0.0044	..D	tray	NaOH_static
MAK	NZ	5731	1977-10-07	NA	-999	1977-10-07	1977.77	-24.2	322	4.9	1.3265	0.0049	...	tray	NaOH_static
MAK	NZ	5732	1977-11-07	1977-11-15	8	1977-11-11	1977.86	-23.4	325.1	4.9	1.3295	0.0049	..D	tray	NaOH_static
MAK	NZ	5866	1978-05-02	NA	-999	1978-05-02	1978.33	-24.6	314.7	4.9	1.3192	0.0049	..D	tray	NaOH_static
MAK	NZ	5867	1978-06-11	NA	-999	1978-06-11	1978.44	-25.8	310.5	4.9	1.315	0.0049	..D	tray	NaOH_static
MAK	NZ	5868	1978-06-30	NA	-999	1978-06-30	1978.49	-25.9	314.9	4.9	1.3194	0.0049	..D	tray	NaOH_static
MAK	NZ	5869	1978-08-04	NA	-999	1978-08-04	1978.59	-25.2	308.9	4.1	1.3134	0.0041	..D	tray	NaOH_static
MAK	NZ	5870	1978-09-04	1978-09-11	7	1978-09-08	1978.69	-18	309	6.7	1.3136	0.0067	...	tray	NaOH_static
MAK	NZ	5871	1978-10-02	1978-10-12	10	1978-10-07	1978.77	-25.5	321.3	11.8	1.3259	0.0118	...	tray	NaOH_static
MAK	NZ	5872	1978-11-10	NA	-999	1978-11-10	1978.86	-25.4	308.1	4.4	1.3127	0.0044	...	tray	NaOH_static
MAK	NZ	5910	1979-01-09	1979-01-15	6	1979-01-12	1979.03	-24.9	310.4	4.2	1.315	0.0042	..D	tray	NaOH_static
MAK	NZ	5911	1979-03-14	1979-03-21	7	1979-03-17	1979.21	-24.7	302.9	4.4	1.3075	0.0044	..D	tray	NaOH_static
MAK	NZ	5912	1979-04-07	NA	-999	1979-04-07	1979.26	-25.3	304.3	4.9	1.3089	0.0049	..D	tray	NaOH_static
MAK	NZ	5913	1979-05-04	1979-05-14	10	1979-05-09	1979.35	-24.9	296.3	4.2	1.3009	0.0042	..D	tray	NaOH_static
MAK	NZ	5914	1979-06-03	NA	-999	1979-06-03	1979.42	-24.5	292.4	4.3	1.297	0.0043	..D	tray	NaOH_static
MAK	NZ	5915	1979-07-10	NA	-999	1979-07-10	1979.52	-24.9	298.7	4.8	1.3033	0.0048	..D	tray	NaOH_static
MAK	NZ	5916	1979-08-12	NA	-999	1979-08-12	1979.61	-25.4	284	5	1.2886	0.005	...	tray	NaOH_static
MAK	NZ	5956	1979-10-05	NA	-999	1979-10-05	1979.76	-25.3	282.9	4.8	1.2875	0.0048	...	tray	NaOH_static
MAK	NZ	5957	1979-11-03	NA	-999	1979-11-03	1979.84	-25.2	303.7	5	1.3084	0.005	..D	tray	NaOH_static
MAK	NZ	5958	1979-12-09	NA	-999	1979-12-09	1979.94	-24.3	276.6	4.3	1.2812	0.0043	..D	tray	NaOH_static
MAK	NZ	5959	1980-02-12	NA	-999	1980-02-12	1980.12	-25.3	282.5	4.3	1.2872	0.0043	..D	tray	NaOH_static
MAK	NZ	5960	1980-03-08	NA	-999	1980-03-08	1980.18	-25.1	289.1	5	1.2938	0.005	..D	tray	NaOH_static
MAK	NZ	5961	1980-04-04	NA	-999	1980-04-04	1980.26	-24.8	277.7	4.3	1.2824	0.0043	..D	tray	NaOH_static
MAK	NZ	5969	1980-05-05	1980-05-12	7	1980-05-08	1980.35	-23.7	279.5	4.3	1.2842	0.0043	..D	tray	NaOH_static
MAK	NZ	6008	1980-07-06	NA	-999	1980-07-06	1980.51	-25.4	281.5	4.8	1.2863	0.0048	...	tray	NaOH_static
MAK	NZ	6009	1980-08-01	NA	-999	1980-08-01	1980.58	-25	274.4	4.8	1.2791	0.0048	..D	tray	NaOH_static
MAK	NZ	6010	1980-09-05	NA	-999	1980-09-05	1980.68	-24.8	278.2	4.3	1.2829	0.0043	..D	tray	NaOH_static
MAK	NZ	6011	1980-10-09	NA	-999	1980-10-09	1980.77	-25.5	282.7	4.8	1.2875	0.0048	...	tray	NaOH_static
MAK	NZ	6012	1980-11-11	NA	-999	1980-11-11	1980.86	-25.6	272.9	4.1	1.2777	0.0041	...	tray	NaOH_static
MAK	NZ	6013	1980-12-04	NA	-999	1980-12-04	1980.92	-25.4	268.6	4.4	1.2733	0.0044	...	tray	NaOH_static
MAK	NZ	6014	1981-01-06	1981-01-13	7	1981-01-10	1981.03	-24.7	266	4.7	1.2708	0.0047	...	tray	NaOH_static
MAK	NZ	6015	1981-02-02	1981-02-09	7	1981-02-06	1981.1	-25.4	260.9	4.7	1.2657	0.0047	...	tray	NaOH_static
MAK	NZ	6016	1981-03-12	NA	-999	1981-03-12	1981.19	-24	264.1	6	1.2689	0.006	...	tray	NaOH_static
MAK	NZ	6017	1981-04-10	NA	-999	1981-04-10	1981.27	-25.2	271	4.3	1.2758	0.0043	..D	tray	NaOH_static
MAK	NZ	6062	1981-06-06	NA	-999	1981-06-06	1981.43	-26.2	263.4	4.7	1.2682	0.0047	..D	tray	NaOH_static
MAK	NZ	6063	1981-08-09	NA	-999	1981-08-09	1981.6	-26.1	259.6	4.2	1.2644	0.0042	..D	tray	NaOH_static
MAK	NZ	6064	1981-09-04	NA	-999	1981-09-04	1981.68	-25.1	258	6.4	1.2629	0.0064	...	tray	NaOH_static
MAK	NZ	6065	1981-09-28	1981-10-05	8	1981-10-02	1981.75	-26	256.9	4.2	1.2617	0.0042	..D	tray	NaOH_static
MAK	NZ	6066	1981-10-28	1981-11-05	7	1981-11-01	1981.83	-25.4	254.7	4.7	1.2596	0.0047	...	tray	NaOH_static
MAK	NZ	6067	1981-11-29	1981-12-07	9	1981-12-03	1981.92	-25.4	254.8	3.9	1.2597	0.0039	...	tray	NaOH_static
MAK	NZ	6449	1982-05-09	NA	-999	1982-05-09	1982.35	-23.5	245.2	4	1.2501	0.004	...	tray	NaOH_static
MAK	NZ	6450	1982-06-05	NA	-999	1982-06-05	1982.43	-25	248.5	4	1.2534	0.004	...	tray	NaOH_static
MAK	NZ	6451	1982-07-08	NA	-999	1982-07-08	1982.52	-23.3	249.1	4.7	1.2541	0.0047	..D	tray	NaOH_static
MAK	NZ	6459	1982-09-02	NA	-999	1982-09-02	1982.67	-25.8	241.2	4	1.2461	0.004	..D	tray	NaOH_static
MAK	NZ	6535	1982-10-07	1982-11-11	35	1982-10-24	1982.81	-25.9	244.1	6.2	1.249	0.0062	..D	tray	NaOH_static
MAK	NZ	6523	1982-12-06	NA	-999	1982-12-06	1982.93	-25.1	235.6	4.2	1.2405	0.0042	..D	tray	NaOH_static
MAK	NZ	6527	1983-01-17	NA	-999	1983-01-17	1983.05	-24.1	233.6	4.6	1.2385	0.0046	...	tray	NaOH_static
MAK	NZ	6528	1983-02-07	NA	-999	1983-02-07	1983.1	-24.9	227.4	4.6	1.2324	0.0046	...	tray	NaOH_static
MAK	NZ	6529	1983-03-06	NA	-999	1983-03-06	1983.18	-25.8	233.9	4.1	1.2389	0.0041	...	tray	NaOH_static
MAK	NZ	6530	1983-06-07	NA	-999	1983-06-07	1983.43	-25.2	235.6	4.6	1.2406	0.0046	...	tray	NaOH_static
MAK	NZ	6538	1983-08-19	NA	-999	1983-08-19	1983.63	-25	234.9	4.6	1.2399	0.0046	..D	tray	NaOH_static
MAK	NZ	6539	1983-10-15	NA	-999	1983-10-15	1983.79	-24.9	221.1	4.6	1.2261	0.0046	..D	tray	NaOH_static
MAK	NZ	6540	1984-01-15	NA	-999	1984-01-15	1984.04	-25	217.5	4.1	1.2225	0.0041	...	tray	NaOH_static
MAK	NZ	6549	1984-02-05	NA	-999	1984-02-05	1984.1	-24.2	230.3	4.6	1.2354	0.0046	...	tray	NaOH_static
MAK	NZ	6816	1984-05-08	NA	-999	1984-05-08	1984.35	-25.3	214.1	4.5	1.2191	0.0045	..D	tray	NaOH_static
MAK	NZ	6817	1984-07-09	NA	-999	1984-07-09	1984.52	-25.3	214.6	4.5	1.2197	0.0045	..D	tray	NaOH_static
MAK	NZ	6807	1984-08-03	NA	-999	1984-08-03	1984.59	-26.4	238.1	5.4	1.2433	0.0054	..D	tray	NaOH_static
MAK	NZ	6820	1984-09-10	NA	-999	1984-09-10	1984.69	-25.4	208.1	4.2	1.2132	0.0042	..D	tray	NaOH_static
MAK	NZ	6821	1984-11-11	NA	-999	1984-11-11	1984.86	-25.4	206.9	3.3	1.212	0.0033	...	tray	NaOH_static
BHD	NZA	56741	1984-11-20	1984-11-20	-999	1984-11-20	1984.89	-7.9	202.6	2	1.2077	0.002	...	flask	Whole_air
MAK	NZ	6831	1984-12-02	NA	-999	1984-12-02	1984.92	-26.4	216.8	4.1	1.2219	0.0041	...	tray	NaOH_static
MAK	NZ	6847	1985-02-02	NA	-999	1985-02-02	1985.09	-26.5	207.1	4.1	1.2122	0.0041	..D	tray	NaOH_static
MAK	NZ	6858	1985-03-24	NA	-999	1985-03-24	1985.23	-25.4	210	4.5	1.2151	0.0045	..D	tray	NaOH_static
BHD	NZA	56750	1985-05-14	1985-05-14	-999	1985-05-14	1985.37	-7.9	201.4	2	1.2066	0.002	...	flask	Whole_air
MAK	NZ	7257	1985-07-02	1985-07-09	7	1985-07-05	1985.51	-27.2	216.2	9.4	1.2214	0.0094	..D	tray	NaOH_static
MAK	NZ	7277	1985-08-05	1985-08-12	7	1985-08-08	1985.6	-25.7	212.5	6.4	1.2177	0.0064	..D	tray	NaOH_static
MAK	NZ	7272	1985-09-05	1985-09-13	8	1985-09-09	1985.69	-25.8	202.8	6.4	1.208	0.0064	..D	tray	NaOH_static
BHD	NZA	56758	1985-10-17	1985-10-17	-999	1985-10-17	1985.79	-7.9	191.9	2	1.1971	0.002	...	flask	Whole_air
MAK	NZ	7408	1985-10-29	1985-11-04	6	1985-11-01	1985.83	-25.9	203.7	4.8	1.2089	0.0048	..D	tray	NaOH_static
MAK	NZ	7409	1985-11-28	1985-12-06	8	1985-12-02	1985.92	-26.6	205.3	4.8	1.2105	0.0048	..D	tray	NaOH_static
BHD	NZA	56759	1985-12-02	1985-12-02	-999	1985-12-02	1985.92	-8	194.8	2	1.2	0.002	...	flask	Whole_air
MAK	NZ	7264	1986-01-06	1986-02-03	28	1986-01-20	1986.05	-23.7	204.6	3.8	1.2099	0.0038	..D	tray	NaOH_static
MAK	NZ	7286	1986-02-10	1986-02-26	16	1986-02-18	1986.13	-26	203.4	6.4	1.2087	0.0064	..D	tray	NaOH_static
BHD	NZA	56760	1986-03-25	1986-03-25	-999	1986-03-25	1986.23	-8	190.9	2.2	1.1962	0.0022	...	flask	Whole_air
MAK	NZ	7382	1986-03-27	1986-04-03	7	1986-03-30	1986.24	-25.9	199.5	5.5	1.2048	0.0055	..D	tray	NaOH_static
MAK	NZ	7395	1986-04-01	1986-04-08	7	1986-04-04	1986.26	-25.6	189.2	6.3	1.1944	0.0063	..D	tray	NaOH_static
MAK	NZ	7417	1986-04-28	1986-05-09	11	1986-05-03	1986.34	-23.5	183.6	7.2	1.1888	0.0072	..D	tray	NaOH_static
BHD	NZA	56761	1986-05-14	1986-05-14	-999	1986-05-14	1986.37	-7.9	195.6	2	1.2009	0.002	...	flask	Whole_air
MAK	NZ	7410	1986-07-08	1986-07-16	8	1986-07-12	1986.53	-25.8	194.6	4.9	1.1999	0.0049	..D	tray	NaOH_static
MAK	NZ	7412	1986-08-06	1986-08-13	7	1986-08-09	1986.6	-26.5	188.4	4.1	1.1937	0.0041	..D	tray	NaOH_static
BHD	NZA	56762	1986-08-12	1986-08-12	-999	1986-08-12	1986.61	-8	186.9	2.1	1.1922	0.0021	...	flask	Whole_air
MAK	NZ	7413	1986-09-03	1986-09-10	7	1986-09-06	1986.68	-26.1	200.6	4.1	1.2059	0.0041	..D	tray	NaOH_static
MAK	NZ	7430	1986-10-01	1986-10-08	7	1986-10-04	1986.76	-26	193.9	4.8	1.1992	0.0048	..D	tray	NaOH_static
MAK	NZ	7431	1986-11-04	1986-11-10	6	1986-11-07	1986.85	-25.5	190.9	4.8	1.1962	0.0048	..D	tray	NaOH_static
MAK	NZ	7432	1986-12-03	1986-12-11	8	1986-12-07	1986.93	-25.6	189.3	4.8	1.1946	0.0048	..D	tray	NaOH_static
MAK	NZ	7454	1986-12-31	1987-01-07	7	1987-01-03	1987.01	-25.4	186.5	4.8	1.1918	0.0048	..D	tray	NaOH_static
BHD	NZA	56763	1987-02-08	1987-02-08	-999	1987-02-08	1987.11	-8	180.7	2	1.186	0.002	...	flask	Whole_air
BHD	NZA	56764	1987-03-12	1987-03-12	-999	1987-03-12	1987.19	-7.9	187	2	1.1924	0.002	...	flask	Whole_air
MAK	NZ	7455	1987-05-06	1987-05-15	9	1987-05-10	1987.35	-25.5	185.8	4.8	1.1912	0.0048	..D	tray	NaOH_static
MAK	NZ	7456	1987-06-05	1987-06-18	13	1987-06-11	1987.44	-25.8	176.2	5.4	1.1815	0.0054	..D	tray	NaOH_static
BHD	NZA	56742	1987-08-18	1987-08-18	-999	1987-08-18	1987.63	-8	181.3	2	1.1867	0.002	...	flask	Whole_air
BHD	NZA	56743	1987-12-22	1987-12-22	-999	1987-12-22	1987.97	-8.1	176.8	2.1	1.1822	0.0022	...	flask	Whole_air
BHD	NZA	54948	1988-05-31	1988-05-31	-999	1988-05-31	1988.41	-7.8	173.4	1.8	1.1788	0.0018	...	flask	Whole_air
BHD	NZA	52871	1988-07-03	1988-07-03	-999	1988-07-03	1988.5	-7.7	172.1	2.3	1.1776	0.0023	...	flask	Whole_air
BHD	NZ	7582	1988-07-08	1988-07-22	14	1988-07-15	1988.54	-25.4	175.7	6.4	1.1812	0.0064	..D	tray	NaOH_static
BHD	NZ	7583	1988-08-12	1988-08-19	7	1988-08-15	1988.62	-25.6	176	6.7	1.1815	0.0067	..D	tray	NaOH_static
BHD	NZA	54956	1988-09-01	1988-09-01	-999	1988-09-01	1988.67	-7.5	168	1.9	1.1735	0.0019	...	flask	Whole_air
BHD	NZ	7650	1988-09-16	1988-09-23	7	1988-09-19	1988.72	-26.5	167.3	5.9	1.1728	0.0059	..D	tray	NaOH_static
BHD	NZ	7651	1988-10-20	1988-10-26	6	1988-10-23	1988.81	-26.3	178.5	7.9	1.184	0.0079	..D	tray	NaOH_static
BHD	NZA	52870	1988-11-21	1988-11-21	-999	1988-11-21	1988.89	-7.8	171.7	2.2	1.1772	0.0022	...	flask	Whole_air
BHD	NZ	7816	1988-11-22	1988-11-29	7	1988-11-25	1988.9	-24.9	178.7	3.2	1.1843	0.0032	..D	tray	NaOH_static
BHD	NZ	7817	1988-12-13	1988-12-19	6	1988-12-16	1988.96	-24.6	169.4	3.5	1.1749	0.0035	..D	tray	NaOH_static
BHD	NZ	7818	1989-01-25	1989-02-01	7	1989-01-28	1989.08	-23.5	175.7	3.6	1.1813	0.0036	..D	tray	NaOH_static
BHD	NZ	7819	1989-02-14	1989-02-24	10	1989-02-19	1989.14	-24.7	167.5	3.8	1.173	0.0038	..D	tray	NaOH_static
BHD	NZA	54957	1989-02-24	1989-02-24	-999	1989-02-24	1989.15	-7.7	162.4	1.8	1.168	0.0018	...	flask	Whole_air
BHD	NZA	56744	1989-04-03	1989-04-03	-999	1989-04-03	1989.25	-8	164.7	2	1.1702	0.002	...	flask	Whole_air
BHD	NZ	7821	1989-05-17	1989-05-25	8	1989-05-21	1989.38	-25	163	3.5	1.1686	0.0035	..D	tray	NaOH_static
BHD	NZA	54958	1989-05-25	1989-05-25	-999	1989-05-25	1989.4	-7.7	160.6	1.8	1.1661	0.0018	...	flask	Whole_air
BHD	NZ	7822	1989-06-21	1989-06-28	7	1989-06-24	1989.48	-24.8	164.7	3.5	1.1703	0.0035	..D	tray	NaOH_static
BHD	NZA	54959	1989-07-20	1989-07-20	-999	1989-07-20	1989.55	-7.7	160.7	1.8	1.1662	0.0018	...	flask	Whole_air
BHD	NZ	7823	1989-07-28	1989-08-09	12	1989-08-03	1989.59	-22.5	164.8	3.8	1.1704	0.0038	..D	tray	NaOH_static
BHD	NZ	7824	1989-08-21	1989-08-31	10	1989-08-26	1989.65	-24.2	160.6	3.8	1.1662	0.0038	..D	tray	NaOH_static
BHD	NZ	7825	1989-09-21	1989-10-04	13	1989-09-27	1989.74	-17.8	145.9	3.7	1.1514	0.0037	..D	tray	NaOH_static
BHD	NZA	56745	1989-10-05	1989-10-05	-999	1989-10-05	1989.76	-8.1	156	1.9	1.1616	0.002	...	flask	Whole_air
BHD	NZA	54960	1989-10-18	1989-10-18	-999	1989-10-18	1989.8	-1000	156.6	1.8	1.1622	0.0018	...	flask	Whole_air
BHD	NZA	56746	1989-11-27	1989-11-27	-999	1989-11-27	1989.91	-8.1	156.1	2	1.1617	0.002	...	flask	Whole_air
BHD	NZ	7827	1989-12-07	1989-12-18	11	1989-12-12	1989.95	-24.8	161.2	3.8	1.1668	0.0038	..D	tray	NaOH_static
BHD	NZA	52872	1989-12-18	1989-12-18	-999	1989-12-18	1989.96	-7.8	154.3	2	1.1599	0.002	...	flask	Whole_air
BHD	NZ	7828	1990-01-16	1990-01-25	9	1990-01-20	1990.05	-24.5	154.1	3.9	1.1597	0.0039	..D	tray	NaOH_static
BHD	NZA	56747	1990-01-24	1990-01-24	-999	1990-01-24	1990.06	-8	159	2	1.1646	0.002	...	flask	Whole_air
BHD	NZA	54949	1990-03-14	1990-03-14	-999	1990-03-14	1990.2	-7.8	154.5	1.8	1.1602	0.0019	...	flask	Whole_air
BHD	NZA	56748	1990-06-06	1990-06-06	-999	1990-06-06	1990.43	-8.1	148.8	1.9	1.1545	0.0019	...	flask	Whole_air
BHD	NZA	56749	1990-09-07	1990-09-07	-999	1990-09-07	1990.68	-8.1	147.3	1.9	1.153	0.0019	...	flask	Whole_air
BHD	NZA	54950	1990-09-24	1990-09-24	-999	1990-09-24	1990.73	-7.8	149.2	1.8	1.1549	0.0018	...	flask	Whole_air
BHD	NZA	54951	1990-11-20	1990-11-20	-999	1990-11-20	1990.89	-7.8	148.2	1.9	1.1539	0.0019	...	flask	Whole_air
BHD	NZA	56751	1990-12-28	1990-12-28	-999	1990-12-28	1990.99	-8	148.2	1.9	1.1539	0.002	...	flask	Whole_air
BHD	NZA	54952	1991-01-17	1991-01-17	-999	1991-01-17	1991.05	-7.8	148.8	1.8	1.1545	0.0018	...	flask	Whole_air
BHD	NZA	56752	1991-02-19	1991-02-19	-999	1991-02-19	1991.14	-8	140.8	1.9	1.1465	0.0019	...	flask	Whole_air
BHD	NZA	52868	1991-03-15	1991-03-15	-999	1991-03-15	1991.2	-7.7	150.8	2	1.1566	0.0021	...	flask	Whole_air
BHD	NZA	56753	1991-05-01	1991-05-01	-999	1991-05-01	1991.33	-8.1	145.6	1.9	1.1513	0.0019	...	flask	Whole_air
BHD	NZA	56754	1991-05-06	1991-05-06	-999	1991-05-06	1991.34	-8.2	145.2	2	1.1509	0.002	...	flask	Whole_air
BHD	NZA	54953	1991-05-29	1991-05-29	-999	1991-05-29	1991.41	-7.7	143.9	1.8	1.1497	0.0018	...	flask	Whole_air
BHD	NZA	56755	1991-09-25	1991-09-25	-999	1991-09-25	1991.73	-8.1	138	2	1.1438	0.002	...	flask	Whole_air
BHD	NZA	52860	1991-09-28	1991-09-28	-999	1991-09-28	1991.74	-7.7	144.7	2.1	1.1505	0.0021	...	flask	Whole_air
BHD	NZA	56756	1991-10-24	1991-10-24	-999	1991-10-24	1991.81	-8.1	138.3	1.9	1.1441	0.0019	...	flask	Whole_air
BHD	NZA	54954	1991-11-29	1991-11-29	-999	1991-11-29	1991.91	-7.7	140.7	1.8	1.1465	0.0018	...	flask	Whole_air
BHD	NZA	54955	1992-03-13	1992-03-13	-999	1992-03-13	1992.2	-7.8	140	1.8	1.1458	0.0018	...	flask	Whole_air
BHD	NZA	52867	1992-06-19	1992-06-19	-999	1992-06-19	1992.47	-7.9	134.7	2	1.1405	0.002	...	flask	Whole_air
BHD	NZ	8008	1993-03-23	1993-04-08	16	1993-03-31	1993.25	-20.5	132.6	3.5	1.1385	0.0035	..D	tray	NaOH_static
BHD	NZ	8071	1993-05-05	1993-05-13	8	1993-05-09	1993.35	-25.1	134.9	3.7	1.1409	0.0037	..D	tray	NaOH_static
BHD	NZ	8072	1993-06-29	1993-07-21	22	1993-07-10	1993.52	-22.4	125.6	3.1	1.1315	0.0031	..D	tray	NaOH_static
BHD	NZ	8073	1993-07-27	1993-08-09	13	1993-08-02	1993.58	-21.2	129.1	3.2	1.1351	0.0032	..D	tray	NaOH_static
BHD	NZ	8074	1993-09-14	1993-09-23	9	1993-09-18	1993.71	-23.7	133.5	3.5	1.1395	0.0035	..D	tray	NaOH_static
BHD	NZ	8149	1994-01-12	1994-01-27	15	1994-01-19	1994.05	-19.1	118.9	4.8	1.1249	0.0048	...	tray	NaOH_static
BHD	NZ	8150	1994-02-11	1994-02-25	14	1994-02-18	1994.13	-20.7	132.5	4.9	1.1386	0.0049	..D	tray	NaOH_static
BHD	NZ	8151	1994-03-28	1994-04-10	13	1994-04-03	1994.25	-24.1	127.1	3.9	1.1331	0.0039	..D	tray	NaOH_static
BHD	NZ	8152	1994-06-04	1994-06-10	6	1994-06-07	1994.43	-22.8	131.5	3.7	1.1376	0.0037	...	tray	NaOH_static
BHD	NZ	8153	1994-07-07	1994-07-24	17	1994-07-15	1994.54	-24.2	125.6	3.9	1.1317	0.0039	..D	tray	NaOH_static
BHD	NZ	8154	1994-08-20	1994-09-09	20	1994-08-30	1994.66	-24.4	121.3	3.6	1.1274	0.0036	..D	tray	NaOH_static
BHD	NZ	8155	1994-10-07	1994-11-16	40	1994-10-27	1994.82	-15.6	128.5	6.3	1.1346	0.0063	..D	tray	NaOH_static
BHD	NZ	8156	1994-11-17	1994-11-29	12	1994-11-23	1994.89	-25.7	124.7	3.9	1.1308	0.0039	...	tray	NaOH_static
BHD	NZ	8157	1994-12-19	1995-01-01	13	1994-12-25	1994.98	-23.7	128.4	3.6	1.1346	0.0036	..D	tray	NaOH_static
BHD	NZ	8158	1995-01-19	1995-02-01	13	1995-01-25	1995.07	-24.1	127.4	3.4	1.1336	0.0034	...	tray	NaOH_static
BHD	NZ	8312	1995-02-28	1995-03-09	9	1995-03-04	1995.17	-24.4	115.7	3.5	1.1218	0.0035	...	tray	NaOH_static
BHD	NZ	8321	1995-03-28	1995-04-18	21	1995-04-07	1995.26	-21.5	118.1	3.6	1.1242	0.0036	..D	tray	NaOH_static
BHD	NZ	8322	1995-05-01	1995-05-18	17	1995-05-09	1995.35	-22.1	113.7	3.5	1.1198	0.0035	..D	tray	NaOH_static
BHD	NZA	59296	1995-06-14	1995-06-26	12	1995-06-20	1995.47	-23.6	119.3	1.9	1.1254	0.0019	...	bottle	NaOH_static
BHD	NZA	9102	1995-06-14	1995-06-26	12	1995-06-20	1995.47	-23.5	107.3	4.2	1.1134	0.0042	.TD	bottle	NaOH_static
BHD	NZA	60930	1995-07-04	1995-07-23	19	1995-07-13	1995.53	-25	113.2	2.1	1.1193	0.0021	...	bottle	NaOH_static
BHD	NZA	9133	1995-07-04	1995-07-23	19	1995-07-13	1995.53	-25.1	111.7	4.3	1.1178	0.0043	.TD	bottle	NaOH_static
BHD	NZA	59816	1995-08-25	1995-09-07	13	1995-08-31	1995.66	-23.2	118.7	2.4	1.1249	0.0024	...	bottle	NaOH_static
BHD	NZA	9079	1995-08-25	1995-09-07	13	1995-08-31	1995.66	-23.3	113.7	4	1.1199	0.004	.TD	bottle	NaOH_static
BHD	NZA	9080	1995-09-12	1995-09-21	9	1995-09-16	1995.71	-24.4	118	4.3	1.1242	0.0043	.TD	bottle	NaOH_static
BHD	NZA	60931	1995-09-26	1995-10-09	13	1995-10-02	1995.75	-22.4	122.5	2	1.1287	0.002	...	bottle	NaOH_static
BHD	NZA	9101	1995-09-26	1995-10-09	13	1995-10-02	1995.75	-22.7	116.8	4.1	1.123	0.0041	.TD	bottle	NaOH_static
BHD	NZA	9175	1995-11-16	1995-12-12	26	1995-11-29	1995.91	-19.3	108.5	4.1	1.1147	0.0041	.TD	bottle	NaOH_static
BHD	NZA	59297	1995-11-16	1995-12-12	26	1995-11-29	1995.91	-19.3	116	1.9	1.1222	0.0019	...	bottle	NaOH_static
BHD	NZA	60932	1995-12-18	1996-01-05	18	1995-12-27	1995.99	-21	108.8	2	1.115	0.002	...	bottle	NaOH_static
BHD	NZA	9134	1995-12-18	1996-01-05	18	1995-12-27	1995.99	-21	107.1	4.1	1.1133	0.0041	.TD	bottle	NaOH_static
BHD	NZA	9155	1996-01-09	1996-01-18	9	1996-01-13	1996.03	-22	110.9	3.9	1.1171	0.0039	.TD	bottle	NaOH_static
BHD	NZA	60933	1996-01-24	1996-02-07	14	1996-01-31	1996.08	-22	116.2	2	1.1225	0.002	...	bottle	NaOH_static
BHD	NZA	9081	1996-01-24	1996-02-07	14	1996-01-31	1996.08	-22	115.7	4.1	1.1219	0.0041	.TD	bottle	NaOH_static
BHD	NZA	9135	1996-02-02	1996-03-22	49	1996-02-26	1996.15	-16.4	111.8	4.1	1.118	0.0041	.TD	bottle	NaOH_static
BHD	NZA	60934	1996-02-02	1996-03-22	49	1996-02-26	1996.15	-16.3	108.4	2	1.1146	0.002	...	bottle	NaOH_static
BHD	NZA	9240	1996-04-01	NA	-999	1996-04-08	1996.27	-23	109.7	4	1.1159	0.004	.TA	bottle	NaOH_static
BHD	NZA	59805	1996-04-24	1996-05-17	23	1996-05-05	1996.34	-19.1	108.6	1.9	1.1148	0.0019	...	bottle	NaOH_static
BHD	NZA	11523	1996-06-15	NA	-999	1996-06-22	1996.47	-20.9	123.5	3.3	1.1298	0.0033	.TD	bottle	NaOH_static
BHD	NZA	11084	1996-09-13	1996-09-26	13	1996-09-19	1996.72	-21.3	116.1	3.6	1.1224	0.0036	.TD	bottle	NaOH_static
BHD	NZA	11085	1996-10-11	1996-10-21	10	1996-10-16	1996.79	-21.6	118.5	3.5	1.1249	0.0035	.TD	bottle	NaOH_static
BHD	NZA	59812	1996-10-11	1996-10-21	10	1996-10-16	1996.79	-21.6	113.1	1.9	1.1194	0.0019	...	bottle	NaOH_static
BHD	NZA	11086	1997-01-23	1997-02-04	12	1997-01-29	1997.08	-23.5	111.9	3.5	1.1182	0.0035	.TD	bottle	NaOH_static
BHD	NZA	60285	1997-01-23	1997-02-04	12	1997-01-29	1997.08	-23.4	114.3	2.3	1.1207	0.0023	...	bottle	NaOH_static
BHD	NZA	11087	1997-03-03	1997-03-14	11	1997-03-08	1997.18	-18.8	100.7	3.4	1.107	0.0034	.TA	bottle	NaOH_static
BHD	NZA	8463	1997-05-02	1997-05-27	25	1997-05-14	1997.37	-15.4	110.9	3.3	1.1172	0.0033	.TD	bottle	NaOH_static
BHD	NZA	22299	1997-07-08	1997-07-21	13	1997-07-14	1997.53	-20.6	114.2	2.1	1.1207	0.0021	.T.	bottle	NaOH_static
BHD	NZA	22300	1999-06-30	1999-07-13	14	1999-07-06	1999.51	-24.3	103	2.1	1.1096	0.0021	.TD	bottle	NaOH_static
BHD	NZA	60288	1999-06-30	1999-07-13	13	1999-07-06	1999.51	-24.2	101.1	2	1.1077	0.002	...	bottle	NaOH_static
BHD	NZA	59817	1999-07-13	1999-07-20	-999	1999-07-16	1999.54	-21	103.1	2	1.1097	0.002	...	bottle	NaOH_static
BHD	NZA	22301	1999-07-13	1999-07-20	8	1999-07-16	1999.54	-21.1	96.1	2.1	1.1027	0.0021	.TD	bottle	NaOH_static
BHD	NZA	11193	1999-08-06	1999-08-16	10	1999-08-11	1999.61	-22.8	78.2	3.4	1.0847	0.0034	.T.	bottle	NaOH_static
BHD	NZA	11277	1999-09-21	1999-10-11	20	1999-10-01	1999.75	-20.6	89.3	4	1.0959	0.004	.TD	bottle	NaOH_static
BHD	NZA	60286	1999-09-21	1999-10-11	20	1999-10-01	1999.75	-20.5	99.9	2.1	1.1066	0.0021	...	bottle	NaOH_static
BHD	NZA	59822	1999-10-11	1999-11-02	22	1999-10-22	1999.81	-17.4	94.8	2.2	1.1014	0.0022	...	bottle	NaOH_static
BHD	NZA	39471	1999-12-01	2000-01-11	-999	1999-12-21	1999.97	-12.2	94.2	2.1	1.1024	0.0021	...	bottle	NaOH_static
BHD	NZA	22302	1999-12-01	2000-01-11	41	1999-12-21	1999.97	-12.1	92.3	2.1	1.0989	0.0021	.TD	bottle	NaOH_static
BHD	NZA	11524	1999-12-01	2000-01-11	41	1999-12-21	1999.97	-12.6	101.2	3.9	1.1079	0.0039	.TD	bottle	NaOH_static
BHD	NZA	14564	2000-01-11	2000-01-30	19	2000-01-20	2000.05	-16.7	87.4	3.4	1.094	0.0034	.TD	bottle	NaOH_static
BHD	NZA	39530	2000-01-11	2000-01-30	19	2000-01-20	2000.05	-18.5	92.9	0.3	1.0995	0.0003	...	bottle	NaOH_static
BHD	NZA	39468	2000-01-22	2000-02-05	14	2000-01-29	2000.08	-21.9	91	2.2	1.0991	0.0022	...	bottle	NaOH_static
BHD	NZA	14566	2000-01-27	2000-02-15	19	2000-02-05	2000.1	-16.9	86.7	3.3	1.0933	0.0033	.TD	bottle	NaOH_static
BHD	NZA	39453	2000-01-27	2000-02-15	19	2000-02-06	2000.1	-22.7	95.5	1.4	1.1022	0.0014	..D	bottle	NaOH_static
BHD	NZA	14565	2000-03-22	2000-03-30	8	2000-03-26	2000.23	-21.1	76.4	3.7	1.083	0.0037	.TA	bottle	NaOH_static
BHD	NZA	59818	2000-03-22	2000-03-30	-999	2000-03-26	2000.23	-22.8	94	1.9	1.1006	0.0019	...	bottle	NaOH_static
BHD	NZA	14568	2000-04-05	2000-05-01	26	2000-04-18	2000.3	-16.8	85	3.2	1.0917	0.0032	.TD	bottle	NaOH_static
BHD	NZA	60290	2000-04-05	2000-05-01	26	2000-04-18	2000.3	-16.4	87.7	1.9	1.0944	0.0019	...	bottle	NaOH_static
BHD	NZA	60287	2000-05-01	2000-05-19	18	2000-05-10	2000.36	-20.2	89.3	2.4	1.0959	0.0024	...	bottle	NaOH_static
BHD	NZA	14569	2000-05-01	2000-05-19	18	2000-05-10	2000.36	-18.5	80.7	3.2	1.0873	0.0032	.TD	bottle	NaOH_static
BHD	NZA	14570	2000-05-26	2000-06-06	11	2000-05-31	2000.41	-22.5	82	3.2	1.0886	0.0032	.TD	bottle	NaOH_static
BHD	NZA	39188	2000-05-26	2000-06-06	11	2000-05-31	2000.41	-22.4	90.8	1.4	1.0975	0.0014	...	bottle	NaOH_static
BHD	NZA	59819	2000-05-26	2000-06-06	11	2000-05-31	2000.41	-22.6	80.1	1.9	1.0867	0.0019	...	bottle	NaOH_static
BHD	NZA	14571	2000-06-12	2000-06-28	16	2000-06-20	2000.47	-22	75.9	3.3	1.0825	0.0033	.TD	bottle	NaOH_static
BHD	NZA	14572	2000-09-11	2000-09-22	11	2000-09-17	2000.71	-24.4	90.1	3.2	1.0968	0.0032	.TA	bottle	NaOH_static
BHD	NZA	14573	2000-09-22	2000-10-10	18	2000-10-01	2000.75	-22.5	93.8	3.5	1.1006	0.0035	.TA	bottle	NaOH_static
BHD	NZA	59820	2000-10-10	2000-10-18	-999	2000-10-14	2000.79	-25.3	88.8	1.9	1.0955	0.002	...	bottle	NaOH_static
BHD	NZA	14574	2000-10-10	2000-10-18	8	2000-10-14	2000.79	-25.5	91.1	3.2	1.0978	0.0032	.TN	bottle	NaOH_static
BHD	NZA	14575	2000-10-18	2000-12-21	64	2000-11-19	2000.88	-12	96.4	3.2	1.1032	0.0032	.TN	bottle	NaOH_static
BHD	NZA	59824	2001-01-03	2001-01-21	16	2001-01-12	2001.03	-22.2	78.2	1.9	1.0849	0.0019	...	bottle	NaOH_static
BHD	NZA	15532	2001-01-03	2001-01-21	18	2001-01-12	2001.03	-22.3	92.3	3.1	1.0991	0.0031	.TD	bottle	NaOH_static
BHD	NZA	15533	2001-03-07	2001-03-16	9	2001-03-11	2001.19	-24.8	86	3.2	1.0927	0.0032	.TD	bottle	NaOH_static
BHD	NZA	39527	2001-03-07	2001-03-16	9	2001-03-11	2001.19	-24.5	85.5	0.5	1.0923	0.0005	...	bottle	NaOH_static
BHD	NZA	15534	2001-03-16	2001-04-04	19	2001-03-25	2001.23	-22.3	92.8	3.1	1.0996	0.0031	.TD	bottle	NaOH_static
BHD	NZA	60289	2001-09-18	2001-10-03	15	2001-09-25	2001.73	-19.7	91.5	2.1	1.0984	0.0022	...	bottle	NaOH_static
BHD	NZA	16594	2001-09-18	2001-10-03	15	2001-09-25	2001.73	-19.7	77.5	2.6	1.0842	0.0026	.T.	bottle	NaOH_static
BHD	NZA	16595	2001-10-03	2001-10-18	15	2001-10-10	2001.77	-20.2	77.3	2.5	1.0841	0.0025	.TD	bottle	NaOH_static
BHD	NZA	16596	2001-10-18	2001-10-31	13	2001-10-24	2001.81	-19.6	83.1	2.5	1.0899	0.0025	.TA	bottle	NaOH_static
BHD	NZA	16597	2001-10-31	2001-11-14	14	2001-11-07	2001.85	-20.7	75.7	3.6	1.0824	0.0036	.T.	bottle	NaOH_static
BHD	NZA	16773	2001-11-26	2001-12-10	14	2001-12-03	2001.92	-19.1	85	2.9	1.0918	0.0029	.T.	bottle	NaOH_static
BHD	NZA	39532	2001-11-26	2001-12-10	14	2001-12-03	2001.92	-19.2	85.6	1.4	1.0925	0.0014	...	bottle	NaOH_static
BHD	NZA	16774	2001-12-10	2001-12-21	11	2001-12-15	2001.95	-17	80	2.9	1.0868	0.0029	.TA	bottle	NaOH_static
BHD	NZA	16775	2001-12-21	2002-01-07	17	2001-12-29	2001.99	-17.6	80.5	2.8	1.0874	0.0028	.TD	bottle	NaOH_static
BHD	NZA	59821	2001-12-21	2002-01-07	17	2001-12-29	2001.99	-17.6	91	2	1.0978	0.002	...	bottle	NaOH_static
BHD	NZA	19527	2002-01-07	2002-01-14	7	2002-01-10	2002.03	-15	78.7	2.3	1.0856	0.0023	.TD	bottle	NaOH_static
BHD	NZA	22303	2002-01-14	2002-02-04	21	2002-01-24	2002.06	-18	94.9	2.2	1.1018	0.0022	.TD	bottle	NaOH_static
BHD	NZA	22304	2002-02-04	2002-02-18	14	2002-02-11	2002.11	-19.3	91.3	2.1	1.0982	0.0021	.TD	bottle	NaOH_static
BHD	NZA	16776	2002-02-18	2002-03-26	36	2002-03-08	2002.18	-12.7	79	2.7	1.0859	0.0027	.TD	bottle	NaOH_static
BHD	NZA	60291	2002-02-18	2002-03-26	36	2002-03-08	2002.18	-12.7	91.7	2	1.0987	0.002	...	bottle	NaOH_static
BHD	NZA	22369	2002-03-26	2002-04-08	13	2002-04-01	2002.25	-21.3	89.8	2	1.0967	0.002	.TN	bottle	NaOH_static
BHD	NZA	22370	2002-04-09	2002-04-24	15	2002-04-17	2002.29	-17.7	94.1	2.3	1.101	0.0023	.TD	bottle	NaOH_static
BHD	NZA	17010	2002-04-24	2002-05-09	15	2002-05-01	2002.33	-20	88	2.3	1.095	0.0023	.TD	bottle	NaOH_static
BHD	NZA	17011	2002-05-09	2002-05-24	15	2002-05-16	2002.37	-19	85.1	2.3	1.092	0.0023	.TD	bottle	NaOH_static
BHD	NZA	60926	2002-05-24	2002-06-06	13	2002-05-30	2002.41	-19.2	78.6	1.9	1.0855	0.0019	...	bottle	NaOH_static
BHD	NZA	17012	2002-05-24	2002-06-06	13	2002-05-30	2002.41	-19.3	83.1	2.3	1.09	0.0023	.TD	bottle	NaOH_static
BHD	NZA	19528	2002-06-06	2002-06-25	19	2002-06-15	2002.45	-19.8	80.6	2.5	1.0875	0.0025	.TA	bottle	NaOH_static
BHD	NZA	18291	2002-06-25	2002-07-15	20	2002-07-05	2002.51	-19	84.4	2.4	1.0913	0.0024	.TD	bottle	NaOH_static
BHD	NZA	19529	2002-07-15	2002-07-24	9	2002-07-19	2002.55	-19	79.6	2.4	1.0865	0.0024	.TD	bottle	NaOH_static
BHD	NZA	18344	2002-07-24	2002-08-07	14	2002-07-31	2002.58	-19	87.2	2.3	1.0941	0.0023	.TD	bottle	NaOH_static
BHD	NZA	59825	2002-07-24	2002-08-08	15	2002-07-31	2002.58	-19	82.5	1.9	1.0894	0.0019	...	bottle	NaOH_static
BHD	NZA	19530	2002-08-08	2002-08-21	13	2002-08-14	2002.62	-19.4	83	2.4	1.0899	0.0024	.T.	bottle	NaOH_static
BHD	NZA	18345	2002-08-29	2002-09-10	12	2002-09-04	2002.68	-24.2	84.8	2.3	1.0917	0.0023	.TA	bottle	NaOH_static
BHD	NZA	19531	2002-09-10	2002-10-02	22	2002-09-21	2002.72	-19.1	81	2.6	1.0879	0.0026	.TA	bottle	NaOH_static
BHD	NZA	18294	2002-10-02	2002-10-17	15	2002-10-09	2002.77	-19.9	86.3	2.3	1.0933	0.0023	.TD	bottle	NaOH_static
BHD	NZA	19532	2002-10-17	2002-11-15	29	2002-10-31	2002.83	-16.8	80.8	3	1.0878	0.003	.TA	bottle	NaOH_static
BHD	NZA	18347	2002-11-15	2002-12-13	28	2002-11-29	2002.91	-18.4	82.7	2.3	1.0896	0.0023	.TA	bottle	NaOH_static
BHD	NZA	60935	2002-12-13	2003-01-08	26	2002-12-26	2002.98	-17.1	76.6	1.9	1.0835	0.002	...	bottle	NaOH_static
BHD	NZA	19599	2002-12-13	2003-01-08	26	2002-12-26	2002.98	-17.1	82.5	2.4	1.0894	0.0024	.TD	bottle	NaOH_static
BHD	NZA	18296	2003-01-08	2003-01-23	15	2003-01-15	2003.04	-18.8	86	2.5	1.093	0.0025	.T.	bottle	NaOH_static
BHD	NZA	59806	2003-01-23	2003-02-10	13	2003-02-01	2003.09	-18.6	75.3	1.9	1.0823	0.0019	...	bottle	NaOH_static
BHD	NZA	19605	2003-01-23	2003-02-10	18	2003-02-01	2003.09	-18.7	81.2	2.6	1.0882	0.0026	.TD	bottle	NaOH_static
BHD	NZA	18349	2003-02-10	2003-03-27	45	2003-03-04	2003.17	-14.2	81.8	2.3	1.0888	0.0023	.TD	bottle	NaOH_static
BHD	NZA	60936	2003-03-27	2003-04-11	15	2003-04-03	2003.25	-17.9	79.3	1.9	1.0863	0.0019	...	bottle	NaOH_static
BHD	NZA	19706	2003-03-27	2003-04-11	15	2003-04-03	2003.25	-18	81.2	2.7	1.0882	0.0027	.T.	bottle	NaOH_static
BHD	NZA	18350	2003-04-11	2003-04-28	17	2003-04-19	2003.3	-17.6	89.3	3.3	1.0964	0.0033	.TD	bottle	NaOH_static
BHD	NZA	19708	2003-04-28	2003-05-23	25	2003-05-10	2003.35	-19.1	86.9	2.6	1.0939	0.0026	.TD	bottle	NaOH_static
BHD	NZA	18299	2003-05-23	2003-06-11	19	2003-06-01	2003.42	-18.3	82.2	2.5	1.0892	0.0025	.T.	bottle	NaOH_static
BHD	NZA	39190	2003-06-11	2003-07-12	31	2003-06-26	2003.48	-19.2	78.6	1.3	1.0856	0.0013	...	bottle	NaOH_static
BHD	NZA	19713	2003-06-11	2003-07-12	31	2003-06-26	2003.48	-19.3	91.1	2.5	1.0982	0.0025	.TA	bottle	NaOH_static
BHD	NZA	18352	2003-07-02	2003-07-14	12	2003-07-08	2003.52	-19.6	87.7	2.6	1.0947	0.0026	.TA	bottle	NaOH_static
BHD	NZA	22371	2003-07-14	2003-07-28	14	2003-07-21	2003.55	-18.5	80.1	2	1.0871	0.002	.TD	bottle	NaOH_static
BHD	NZA	60937	2003-07-28	2003-08-25	28	2003-08-11	2003.61	-18.2	84.2	1.9	1.0912	0.002	...	bottle	NaOH_static
BHD	NZA	22372	2003-08-25	2003-09-17	23	2003-09-05	2003.68	-19.4	77.1	1.9	1.0841	0.0019	.TD	bottle	NaOH_static
BHD	NZA	22373	2003-10-01	2003-10-15	14	2003-10-08	2003.77	-18.9	80.1	2	1.0871	0.002	.T.	bottle	NaOH_static
BHD	NZA	39191	2003-10-01	2003-10-15	14	2003-10-08	2003.77	-18.9	73.5	1.4	1.0805	0.0014	...	bottle	NaOH_static
BHD	NZA	22374	2003-11-05	2003-12-04	29	2003-11-19	2003.88	-18	78.7	2	1.0857	0.002	.TD	bottle	NaOH_static
BHD	NZA	60938	2003-12-04	2003-12-17	13	2003-12-10	2003.94	-20.3	73.5	1.9	1.0805	0.0019	...	bottle	NaOH_static
BHD	NZA	22522	2003-12-17	2004-01-06	20	2003-12-27	2003.99	-19.4	74.8	2.2	1.0818	0.0022	.TN	bottle	NaOH_static
BHD	NZA	53841	2003-12-17	2004-01-06	20	2003-12-27	2003.99	-19.5	74.1	0.7	1.0812	0.0007	..D	bottle	NaOH_static
BHD	NZA	60281	2004-01-06	2004-01-22	16	2004-01-14	2004.04	-19.4	81.2	1.9	1.0883	0.0019	...	bottle	NaOH_static
BHD	NZA	22523	2004-01-22	2004-02-12	21	2004-02-01	2004.09	-17.5	70	2.1	1.077	0.0021	.TD	bottle	NaOH_static
BHD	NZA	22524	2004-02-26	2004-03-15	18	2004-03-06	2004.18	-18.5	72.8	2.2	1.0798	0.0022	.TD	bottle	NaOH_static
BHD	NZA	60939	2004-03-15	2004-03-30	15	2004-03-22	2004.22	-18.4	72	1.9	1.0791	0.0019	...	bottle	NaOH_static
BHD	NZA	22525	2004-03-30	2004-04-19	20	2004-04-09	2004.27	-19.2	66.7	2.1	1.0737	0.0021	.TD	bottle	NaOH_static
BHD	NZA	59807	2004-04-19	2004-05-17	28	2004-05-03	2004.34	-18.1	85.4	1.9	1.0926	0.0019	...	bottle	NaOH_static
BHD	NZA	22589	2004-05-17	2004-06-03	17	2004-05-25	2004.4	-18.2	71.2	1.9	1.0783	0.0019	.T.	bottle	NaOH_static
BHD	NZA	60940	2004-06-03	2004-06-18	15	2004-06-10	2004.44	-20.7	69.1	1.9	1.0761	0.0019	...	bottle	NaOH_static
BHD	NZA	22590	2004-06-18	2004-06-30	12	2004-06-24	2004.48	-20.8	69.1	1.9	1.0762	0.0019	.TA	bottle	NaOH_static
BHD	NZA	26053	2004-06-30	2004-07-23	23	2004-07-11	2004.53	-18.2	71.1	2	1.0782	0.002	..D	bottle	NaOH_static
BHD	NZA	22652	2004-07-23	2004-09-15	54	2004-08-19	2004.63	-10.8	82.1	2.4	1.0893	0.0024	.TD	bottle	NaOH_static
BHD	NZA	39447	2004-11-01	2004-11-17	16	2004-11-09	2004.86	-19.2	71.5	2	1.0802	0.0021	...	bottle	NaOH_static
BHD	NZA	22653	2004-11-01	2004-11-17	16	2004-11-09	2004.86	-19.4	73.8	2.4	1.081	0.0024	.TD	bottle	NaOH_static
BHD	NZA	26054	2004-11-17	2004-12-06	19	2004-11-26	2004.9	-19.1	69.5	1.8	1.0766	0.0018	..D	bottle	NaOH_static
BHD	NZA	22719	2004-12-06	2004-12-21	15	2004-12-13	2004.95	-18.6	71	2.1	1.0782	0.0021	.TD	bottle	NaOH_static
BHD	NZA	59808	2004-12-06	2004-12-21	15	2004-12-13	2004.95	-18.6	63.8	1.9	1.0709	0.0019	...	bottle	NaOH_static
BHD	NZA	26055	2004-12-21	2005-01-10	20	2004-12-31	2005	-18.1	65.5	1.9	1.0726	0.0019	...	bottle	NaOH_static
BHD	NZA	22720	2005-01-10	2005-01-28	18	2005-01-19	2005.05	-19.2	73.2	2.2	1.0804	0.0022	.TD	bottle	NaOH_static
BHD	NZA	26056	2005-01-28	2005-02-23	26	2005-02-10	2005.11	-16.6	68.9	2	1.076	0.002	...	bottle	NaOH_static
BHD	NZA	22721	2005-02-23	2005-03-21	26	2005-03-08	2005.18	-17	63	2.1	1.0702	0.0021	.TA	bottle	NaOH_static
BHD	NZA	60941	2005-02-23	2005-03-21	26	2005-03-08	2005.18	-16.9	68.9	1.9	1.076	0.0019	...	bottle	NaOH_static
BHD	NZA	22551	2005-03-21	2005-04-06	16	2005-03-29	2005.24	-19.9	69.4	2.1	1.0766	0.0021	.TA	bottle	NaOH_static
BHD	NZA	22552	2005-03-21	2005-04-06	16	2005-03-29	2005.24	-18	76.3	2.1	1.0835	0.0021	.TA	tray	NaOH_static
BHD	NZA	39452	2005-04-06	2005-04-26	20	2005-04-16	2005.29	-18.3	65.1	1.6	1.0722	0.0016	...	bottle	NaOH_static
BHD	NZA	22553	2005-04-06	2005-04-26	20	2005-04-16	2005.29	-18.4	80.3	2.1	1.0876	0.0021	.TD	bottle	NaOH_static
BHD	NZA	22554	2005-04-06	2005-04-26	20	2005-04-16	2005.29	-19.1	77.2	2	1.0844	0.002	.TD	tray	NaOH_static
BHD	NZA	26057	2005-04-26	2005-05-13	17	2005-05-04	2005.34	-19.2	72.2	1.9	1.0794	0.0019	..D	bottle	NaOH_static
BHD	NZA	26058	2005-05-13	2005-05-24	11	2005-05-18	2005.38	-18.4	70.2	2	1.0774	0.002	..D	bottle	NaOH_static
BHD	NZA	30011	2005-05-24	2005-06-22	29	2005-06-07	2005.43	-18.9	65.4	1.2	1.0726	0.0012	...	bottle	NaOH_static
BHD	NZA	59809	2005-06-22	2005-07-13	21	2005-07-02	2005.5	-20.1	67	1.9	1.0742	0.0019	...	bottle	NaOH_static
BHD	NZA	30012	2005-07-13	2005-07-29	16	2005-07-21	2005.55	-20.9	64	1.2	1.0712	0.0012	...	bottle	NaOH_static
BHD	NZA	30013	2005-08-18	2005-09-08	21	2005-08-28	2005.66	-19.9	66.8	1.2	1.074	0.0012	...	bottle	NaOH_static
BHD	NZA	30014	2005-09-19	2005-10-26	37	2005-10-07	2005.77	-19	65	1.3	1.0723	0.0013	...	bottle	NaOH_static
BHD	NZA	30027	2005-11-17	2005-12-11	24	2005-11-29	2005.91	-19.3	61.2	1.6	1.0684	0.0016	...	bottle	NaOH_static
BHD	NZA	30035	2006-01-04	2006-01-26	22	2006-01-15	2006.04	-18.8	62.1	1.5	1.0694	0.0015	...	bottle	NaOH_static
BHD	NZA	30036	2006-02-10	2006-03-10	28	2006-02-24	2006.15	-17.2	59.2	1.6	1.0664	0.0016	...	bottle	NaOH_static
BHD	NZA	30037	2006-04-06	2006-05-03	27	2006-04-19	2006.3	-17.3	60.4	1.6	1.0676	0.0016	...	bottle	NaOH_static
BHD	NZA	32477	2006-05-18	2006-06-09	22	2006-05-29	2006.41	-18.3	58.4	1.4	1.0656	0.0014	...	bottle	NaOH_static
BHD	NZA	32478	2006-06-22	2006-07-19	27	2006-07-05	2006.51	-18.3	57.3	1.7	1.0645	0.0017	...	bottle	NaOH_static
BHD	NZA	32479	2006-08-09	2006-08-24	15	2006-08-16	2006.62	-22.6	60.7	1.5	1.068	0.0015	...	bottle	NaOH_static
BHD	NZA	39543	2006-08-09	2006-08-24	15	2006-08-16	2006.62	-22.8	55.5	2.1	1.0642	0.0021	...	bottle	NaOH_static
BHD	NZA	30038	2006-09-08	2006-10-03	25	2006-09-20	2006.72	-18.7	59.5	1.6	1.0668	0.0016	...	bottle	NaOH_static
BHD	NZA	60282	2006-10-03	2006-10-18	15	2006-10-10	2006.77	-20.6	64.3	1.9	1.0717	0.002	...	bottle	NaOH_static
BHD	NZA	32480	2006-10-18	2006-11-01	14	2006-10-25	2006.82	-20.9	60.7	1.5	1.068	0.0015	...	bottle	NaOH_static
BHD	NZA	60942	2006-11-01	2007-04-13	163	2007-01-21	2007.06	-15.2	55.8	1.9	1.0631	0.0019	...	bottle	NaOH_static
BHD	NZA	59810	2007-05-09	2007-05-25	16	2007-05-17	2007.37	-16.1	57.1	1.9	1.0645	0.0019	...	bottle	NaOH_static
BHD	NZA	32482	2007-05-25	2007-06-27	33	2007-06-10	2007.44	-16.7	59.4	1.5	1.0667	0.0015	...	bottle	NaOH_static
BHD	NZA	32483	2007-07-12	2007-07-25	13	2007-07-18	2007.54	-15.5	54.6	1.4	1.062	0.0014	...	bottle	NaOH_static
BHD	NZA	32511	2007-08-02	2007-08-20	18	2007-08-11	2007.61	-16	57.8	1.5	1.0652	0.0015	...	bottle	NaOH_static
BHD	NZA	32512	2007-09-12	2007-10-03	21	2007-09-22	2007.72	-16.1	57.5	1.6	1.0649	0.0016	...	bottle	NaOH_static
BHD	NZA	32522	2007-10-19	2007-11-08	20	2007-10-29	2007.83	-16.2	57.1	1.5	1.0645	0.0015	...	bottle	NaOH_static
BHD	NZA	32523	2007-11-28	2007-12-19	21	2007-12-08	2007.94	-16.8	58.1	1.5	1.0655	0.0015	...	bottle	NaOH_static
BHD	NZA	32524	2008-01-10	2008-01-24	14	2008-01-17	2008.05	-15.2	54	1.2	1.0614	0.0012	...	bottle	NaOH_static
BHD	NZA	32561	2008-02-20	2008-03-13	22	2008-03-02	2008.17	-17.2	56.6	1.4	1.064	0.0014	...	bottle	NaOH_static
BHD	NZA	32562	2008-04-01	2008-04-17	16	2008-04-09	2008.27	-15.3	51	1.3	1.0584	0.0013	...	bottle	NaOH_static
BHD	NZA	32579	2008-05-08	2008-05-29	21	2008-05-18	2008.38	-16	52.4	1.5	1.0599	0.0015	...	bottle	NaOH_static
BHD	NZA	32580	2008-06-17	2008-07-04	17	2008-06-25	2008.48	-16.4	50.7	1.2	1.0582	0.0012	...	bottle	NaOH_static
BHD	NZA	32660	2008-07-22	2008-08-06	15	2008-07-29	2008.58	-16.5	54.9	1.5	1.0624	0.0015	...	bottle	NaOH_static
BHD	NZA	32661	2008-08-20	2008-09-04	15	2008-08-27	2008.65	-16.2	53.3	1.3	1.0608	0.0013	...	bottle	NaOH_static
BHD	NZA	34032	2008-10-16	2008-10-29	13	2008-10-22	2008.81	-15.4	49.9	1.5	1.0574	0.0015	...	bottle	NaOH_static
BHD	NZA	34033	2008-11-20	2008-12-18	28	2008-12-04	2008.92	-15.7	51.1	2.1	1.0586	0.0021	...	bottle	NaOH_static
BHD	NZA	34034	2009-01-05	2009-01-22	17	2009-01-13	2009.03	-15.4	50.5	2.1	1.058	0.0021	...	bottle	NaOH_static
BHD	NZA	34052	2009-02-02	2009-02-23	21	2009-02-12	2009.12	-14.7	51.6	1.1	1.0592	0.0011	..O	bottle	NaOH_static
BHD	NZA	32662	2009-03-20	2009-04-01	12	2009-03-26	2009.23	-15.2	51.9	1.3	1.0595	0.0013	...	bottle	NaOH_static
BHD	NZA	34053	2009-04-30	2009-05-13	13	2009-05-06	2009.34	-15.2	48.6	1.1	1.0562	0.0011	...	bottle	NaOH_static
BHD	NZA	60283	2009-05-13	2009-05-26	13	2009-05-19	2009.38	-18.3	51	1.9	1.0586	0.0019	...	bottle	NaOH_static
BHD	NZA	39192	2009-05-26	2009-06-11	16	2009-06-03	2009.42	-15.1	52.1	1.3	1.0597	0.0013	...	bottle	NaOH_static
BHD	NZA	54542	2009-07-03	2009-07-31	28	2009-07-17	2009.54	-15.9	49.5	0.8	1.0571	0.0008	..D	bottle	NaOH_static
BHD	NZA	60927	2009-07-31	2009-08-12	12	2009-08-06	2009.6	-14	46.6	1.8	1.0541	0.0018	...	bottle	NaOH_static
BHD	NZA	59811	2009-08-28	2009-09-07	10	2009-09-02	2009.67	-16.6	48.3	1.9	1.0559	0.0019	...	bottle	NaOH_static
BHD	NZA	39448	2009-09-07	2009-09-24	17	2009-09-15	2009.71	-15.4	49.4	1.5	1.057	0.0015	...	bottle	NaOH_static
BHD	NZA	39456	2009-10-16	2009-11-05	20	2009-10-26	2009.82	-16.4	52.4	1.5	1.06	0.0015	...	bottle	NaOH_static
BHD	NZA	60928	2009-11-05	2009-11-17	12	2009-11-11	2009.86	-15.5	50.3	1.9	1.0579	0.0019	...	bottle	NaOH_static
BHD	NZA	53625	2009-11-17	2009-12-02	15	2009-11-24	2009.9	-14.9	51.2	0.7	1.0588	0.0007	..D	bottle	NaOH_static
BHD	NZA	59813	2010-01-19	2010-02-01	13	2010-01-25	2010.07	-15.2	46.1	1.9	1.0537	0.0019	...	bottle	NaOH_static
BHD	NZA	60929	2010-04-16	2010-04-27	11	2010-04-21	2010.3	-14.2	47	1.8	1.0547	0.0018	...	bottle	NaOH_static
BHD	NZA	39195	2010-04-27	2010-05-12	15	2010-05-04	2010.34	-15.1	49.8	1.7	1.0575	0.0018	...	bottle	NaOH_static
BHD	NZA	39198	2010-06-01	2010-06-15	14	2010-06-08	2010.43	-15.7	48.8	1.4	1.0565	0.0014	...	bottle	NaOH_static
BHD	NZA	39450	2010-07-20	2010-08-13	24	2010-08-01	2010.58	-16.8	49.1	2.6	1.0583	0.0026	...	bottle	NaOH_static
BHD	NZA	39193	2010-08-31	2010-09-08	8	2010-09-04	2010.68	-14.7	49.7	1.7	1.0574	0.0017	...	bottle	NaOH_static
BHD	NZA	39451	2010-10-08	2010-10-20	12	2010-10-14	2010.78	-14.4	48.4	1.5	1.0561	0.0015	...	bottle	NaOH_static
BHD	NZA	53627	2010-11-12	2010-11-25	13	2010-11-18	2010.88	-12.7	51.9	0.5	1.0597	0.0005	..D	bottle	NaOH_static
BHD	NZA	60284	2010-11-25	2010-12-09	14	2010-12-02	2010.92	-13.5	46.8	1.9	1.0545	0.0019	...	bottle	NaOH_static
BHD	NZA	59815	2010-12-29	2011-01-12	14	2011-01-05	2011.01	-13.3	50	1.9	1.0577	0.0019	...	bottle	NaOH_static
BHD	NZA	39209	2011-01-12	2011-01-26	14	2011-01-19	2011.05	-13.5	45	1.2	1.0527	0.0012	...	bottle	NaOH_static
BHD	NZA	39201	2011-02-15	2011-03-11	24	2011-02-27	2011.16	-13.9	43.4	1.7	1.0511	0.0018	...	bottle	NaOH_static
BHD	NZA	39210	2011-03-23	2011-04-06	14	2011-03-30	2011.24	-13.1	41.1	1.7	1.0489	0.0017	...	bottle	NaOH_static
BHD	NZA	54545	2011-04-21	2011-05-05	14	2011-04-28	2011.32	-15.8	41.1	1.9	1.0503	0.0019	..D	bottle	NaOH_static
BHD	NZA	54546	2011-05-24	2011-06-08	15	2011-05-31	2011.41	-13.3	38.2	2	1.0475	0.002	..D	bottle	NaOH_static
BHD	NZA	54547	2011-07-06	2011-07-19	13	2011-07-12	2011.53	-15.1	39.6	1.9	1.0489	0.002	..D	bottle	NaOH_static
BHD	NZA	54548	2011-08-10	2011-08-30	20	2011-08-20	2011.63	-16.7	38.3	1.9	1.0476	0.0019	..D	bottle	NaOH_static
BHD	NZA	54549	2011-09-14	2011-10-07	23	2011-09-25	2011.73	-14.7	38.6	1.9	1.0479	0.0019	..D	bottle	NaOH_static
BHD	NZA	54550	2011-10-27	2011-11-22	26	2011-11-09	2011.86	-14.3	39.3	2	1.0486	0.002	..D	bottle	NaOH_static
BHD	NZA	54551	2011-12-08	2012-01-05	28	2011-12-22	2011.97	-14	36.8	2	1.0461	0.002	..D	bottle	NaOH_static
BHD	NZA	54552	2012-01-24	2012-02-16	23	2012-02-04	2012.09	-13.8	37.8	1.9	1.0471	0.002	..D	bottle	NaOH_static
BHD	NZA	54553	2012-03-07	2012-03-28	21	2012-03-17	2012.21	-14.7	38.5	1.9	1.0479	0.002	..D	bottle	NaOH_static
BHD	NZA	54554	2012-04-17	2012-05-03	16	2012-04-25	2012.32	-14.1	34.5	1.9	1.0438	0.002	..D	bottle	NaOH_static
BHD	NZA	54555	2012-05-29	2012-06-13	15	2012-06-05	2012.43	-13.9	34.5	1.9	1.0439	0.002	..D	bottle	NaOH_static
BHD	NZA	56624	2012-06-07	2012-06-07	-999	2012-06-07	2012.43	-8.2	38.6	1.8	1.0465	0.0018	...	flask	Whole_air
BHD	NZA	59269	2012-06-20	2012-06-20	-999	2012-06-20	2012.47	-8.3	38.9	1.8	1.0468	0.0018	...	flask	Whole_air
BHD	NZA	54556	2012-06-27	2012-07-10	13	2012-07-03	2012.5	-14.8	31.8	1.9	1.0411	0.0019	..D	bottle	NaOH_static
BHD	NZA	54557	2012-07-26	2012-08-22	27	2012-08-08	2012.6	-14.4	35.4	2.5	1.0448	0.0025	..D	bottle	NaOH_static
BHD	NZA	56625	2012-09-12	2012-09-12	-999	2012-09-12	2012.7	-8.3	36.4	1.8	1.0443	0.0019	...	flask	Whole_air
BHD	NZA	54558	2012-09-14	2012-10-11	27	2012-09-27	2012.74	-14.7	33	1.9	1.0424	0.0019	..D	bottle	NaOH_static
BHD	NZA	59270	2012-09-29	2012-09-29	-999	2012-09-29	2012.74	-8.2	34.1	1.8	1.042	0.0018	...	flask	Whole_air
BHD	NZA	54559	2012-10-23	2012-11-26	34	2012-11-09	2012.86	-15.6	33.5	1.9	1.0429	0.002	..D	bottle	NaOH_static
BHD	NZA	56626	2012-11-29	2012-11-29	-999	2012-11-29	2012.91	-8.3	34	1.8	1.0419	0.0019	...	flask	Whole_air
BHD	NZA	56825	2012-12-12	2013-01-17	36	2012-12-30	2013	-15.4	30.8	1.9	1.0387	0.0019	..D	bottle	NaOH_static
BHD	NZA	54560	2012-12-12	2013-01-17	36	2012-12-30	2013	-15.4	37.6	2	1.0471	0.002	..D	bottle	NaOH_static
BHD	NZA	54561	2013-02-04	2013-02-19	15	2013-02-11	2013.11	-14	31.9	1.9	1.0413	0.002	..D	bottle	NaOH_static
BHD	NZA	59271	2013-02-17	2013-02-17	-999	2013-02-17	2013.13	-8.3	34.8	1.8	1.0428	0.0018	...	flask	Whole_air
BHD	NZA	59272	2013-03-02	2013-03-02	-999	2013-03-02	2013.17	-8.3	38.9	1.8	1.0469	0.0018	...	flask	Whole_air
BHD	NZA	54562	2013-03-05	2013-03-22	17	2013-03-13	2013.2	-14.1	33.2	1.9	1.0427	0.002	..D	bottle	NaOH_static
BHD	NZA	59273	2013-03-26	2013-03-26	-999	2013-03-26	2013.23	-8.3	37.6	1.8	1.0455	0.0018	...	flask	Whole_air
BHD	NZA	54563	2013-04-09	2013-04-23	14	2013-04-16	2013.29	-13.8	31.1	1.9	1.0406	0.0019	..D	bottle	NaOH_static
BHD	NZA	54564	2013-05-08	2013-05-22	14	2013-05-15	2013.37	-13.8	30.6	1.9	1.0401	0.0019	..D	bottle	NaOH_static
BHD	NZA	59274	2013-05-19	2013-05-19	-999	2013-05-19	2013.38	-8.3	31.3	1.7	1.0392	0.0018	...	flask	Whole_air
BHD	NZA	56822	2013-06-06	2013-07-05	29	2013-06-20	2013.47	-16.1	32.8	1.9	1.0408	0.0019	..D	bottle	NaOH_static
BHD	NZA	59275	2013-06-28	2013-06-28	-999	2013-06-28	2013.49	-8.3	34.2	1.7	1.0422	0.0017	...	flask	Whole_air
BHD	NZA	56827	2013-08-23	2013-09-03	11	2013-08-28	2013.66	-15.3	27.9	1.9	1.0358	0.0019	..D	bottle	NaOH_static
BHD	NZA	56828	2013-09-17	2013-10-02	15	2013-09-24	2013.73	-15.1	31.3	1.9	1.0393	0.0019	..D	bottle	NaOH_static
BHD	NZA	59276	2013-09-27	2013-09-27	-999	2013-09-27	2013.74	-8.4	29.4	1.7	1.0373	0.0018	...	flask	Whole_air
BHD	NZA	60912	2013-10-04	2013-10-04	-999	2013-10-04	2013.76	-8.6	31.1	0.2	1.0391	0.0002	...	cylinder	Whole_air
BHD	NZA	56829	2013-10-17	2013-11-14	28	2013-10-31	2013.83	-13.5	28.2	1.9	1.0361	0.0019	..D	bottle	NaOH_static
BHD	NZA	56830	2013-11-27	2013-12-12	15	2013-12-04	2013.92	-13.3	29.6	1.9	1.0376	0.0019	..D	bottle	NaOH_static
BHD	NZA	56831	2014-01-06	2014-01-27	21	2014-01-16	2014.04	-13.1	25	1.9	1.033	0.0019	..D	bottle	NaOH_static
BHD	NZA	56820	2014-03-17	2014-03-31	-999	2014-03-24	2014.23	-12.3	29.1	1.8	1.0371	0.0018	...	bottle	NaOH_pumped
BHD	NZA	56833	2014-03-17	2014-03-31	14	2014-03-24	2014.23	-13.9	29.1	1.9	1.0372	0.0019	..D	bottle	NaOH_static
BHD	NZA	56823	2014-03-31	2014-04-15	15	2014-04-07	2014.26	-13.1	24.4	1.9	1.0324	0.0019	..D	bottle	NaOH_static
BHD	NZA	56821	2014-03-31	2014-04-15	-999	2014-04-07	2014.26	-11.5	30.6	1.9	1.0386	0.0019	...	bottle	NaOH_pumped
BHD	NZA	56824	2014-04-15	2014-05-06	21	2014-04-25	2014.31	-13.4	26	1.9	1.034	0.0019	..D	bottle	NaOH_static
BHD	NZA	59290	2014-05-19	2014-06-12	24	2014-05-31	2014.41	-13.5	24.3	1.8	1.0323	0.0018	...	bottle	NaOH_static
BHD	NZA	59291	2014-07-15	2014-07-29	14	2014-07-22	2014.55	-13.4	23.2	1.7	1.0312	0.0018	...	bottle	NaOH_static
BHD	NZA	59292	2014-08-18	2014-09-05	18	2014-08-27	2014.65	-13.2	24.7	1.7	1.0328	0.0017	...	bottle	NaOH_static
BHD	NZA	59293	2014-09-22	2014-10-15	23	2014-10-03	2014.75	-13.4	27.4	1.8	1.0354	0.0018	...	bottle	NaOH_static
BHD	NZA	59294	2014-10-31	2014-11-18	18	2014-11-09	2014.86	-13.3	24.4	1.7	1.0324	0.0018	...	bottle	NaOH_static
BHD	NZA	59295	2014-12-03	2014-12-15	12	2014-12-09	2014.94	-12.9	23.2	1.7	1.0312	0.0018	...	bottle	NaOH_static
BHD	NZA	59298	2014-12-15	2014-12-15	-999	2014-12-15	2014.95	-8.4	26	1.8	1.0341	0.0019	...	flask	Whole_air
BHD	NZA	59827	2015-07-22	2015-08-05	-999	2015-07-29	2015.57	-14.4	19.1	1.8	1.0272	0.0018	...	bottle	NaOH_static
BHD	NZA	59826	2015-07-22	2015-08-05	14	2015-07-29	2015.57	-13.2	19.5	1.8	1.0276	0.0019	...	bottle	NaOH_static

## Sheet: WLG_TREERING_DATA
WLG 14C TREERING DATA
This sheet contains WLG tree ring measurements and sampling information
These data are not included in the WLG final screened dataset as the temproal resolution differs from the main dataset, but have been validated and are deemed to be appropriate for use when annual mean resolution is required
Users should refer to Turnbull et al., (in press) and associated supplementary material for details of sampling methods
This work must be cited appropriately in any publication, presentation or other use or distribution of the dataset. Please contact Jocelyn Turnbull (j.turnbull@gns.cri.nz) prior to use.
SITE	NZPREFIX	NZ	DATE_ST	DATE_END	DAYS_EXP	DATE_COLL	DECIMAL_DATE	DELTA13C_IRMS	DELTA14C	DELTA14C_ERR	F14C	F14C_ERR	FLAG	METH_VESSEL	METH_COLL
NIK	NZA	59415	NA	NA	-999	1948-01-01	1948	-18.7	-26.6	2.1	0.9732	0.0021	...	tree	single_tree_ring
NIK	NZA	59626	NA	NA	-999	1951-01-01	1951	-18.9	-32.3	2.1	0.9678	0.0021	...	tree	single_tree_ring
NIK	NZA	60423	NA	NA	-999	1954-01-01	1954	-18.9	-30.6	2.1	0.9699	0.0021	...	tree	single_tree_ring
NIK	NZA	58647	NA	NA	-999	1956-01-01	1956	-20.8	-18.2	2.1	0.9825	0.0021	...	tree	single_tree_ring
NIK	NZA	58655	NA	NA	-999	1956-01-01	1956	-18.7	-12.3	2.1	0.9884	0.0021	...	tree	single_tree_ring
NIK	NZA	59414	NA	NA	-999	1957-01-01	1957	-18.2	10.3	2.2	1.0112	0.0022	...	tree	single_tree_ring
NIK	NZA	59413	NA	NA	-999	1960-01-01	1960	-20	165.1	2.5	1.1665	0.0025	...	tree	single_tree_ring
NIK	NZA	58654	NA	NA	-999	1963-01-01	1963	-19.9	238.7	2.6	1.2407	0.0026	...	tree	single_tree_ring
NIK	NZA	58646	NA	NA	-999	1963-01-01	1963	-21.4	229.6	2.6	1.2315	0.0026	...	tree	single_tree_ring
NIK	NZA	59412	NA	NA	-999	1964-01-01	1964	-18.9	412.7	3	1.4151	0.003	...	tree	single_tree_ring
NIK	NZA	58645	NA	NA	-999	1965-01-01	1965	-21.3	532.9	3.2	1.5356	0.0032	...	tree	single_tree_ring
NIK	NZA	58653	NA	NA	-999	1965-01-01	1965	-19.2	577.4	3.3	1.5802	0.0033	...	tree	single_tree_ring
NIK	NZA	59625	NA	NA	-999	1966-01-01	1966	-19.1	610.9	3.3	1.614	0.0034	...	tree	single_tree_ring
NIK	NZA	60421	NA	NA	-999	1967-01-01	1967	-20.4	598.1	3.4	1.6014	0.0034	...	tree	single_tree_ring
NIK	NZA	59411	NA	NA	-999	1968-01-01	1968	-19.7	575.1	3.3	1.5785	0.0033	...	tree	single_tree_ring
NIK	NZA	60420	NA	NA	-999	1969-01-01	1969	-19.9	531.9	3.2	1.5354	0.0032	...	tree	single_tree_ring
NIK	NZA	59400	NA	NA	-999	1970-01-01	1970	-19	532.1	2.3	1.5358	0.0023	...	tree	single_tree_ring
NIK	NZA	58652	NA	NA	-999	1971-01-01	1971	-19.4	494.8	2.2	1.4986	0.0022	...	tree	single_tree_ring
NIK	NZA	58644	NA	NA	-999	1971-01-01	1971	-21	489.9	3.1	1.4936	0.0031	...	tree	single_tree_ring
NIK	NZA	60419	NA	NA	-999	1972-01-01	1972	-19.1	479.3	3.1	1.4833	0.0031	...	tree	single_tree_ring
NIK	NZA	60418	NA	NA	-999	1973-01-01	1973	-19.2	447	3.1	1.4511	0.0031	...	tree	single_tree_ring
NIK	NZA	60417	NA	NA	-999	1974-01-01	1974	-19	422.8	3	1.427	0.003	...	tree	single_tree_ring
NIK	NZA	60416	NA	NA	-999	1975-01-01	1975	-19.6	387.2	2.9	1.3915	0.0029	...	tree	single_tree_ring
NIK	NZA	59624	NA	NA	-999	1976-01-01	1976	-19.3	366.8	2.9	1.3711	0.0029	...	tree	single_tree_ring
NIK	NZA	59623	NA	NA	-999	1978-01-01	1978	-20	316.8	2.7	1.3212	0.0027	...	tree	single_tree_ring
NIK	NZA	59409	NA	NA	-999	1980-01-01	1980	-20.9	287.1	2.7	1.2917	0.0027	...	tree	single_tree_ring
NIK	NZA	58643	NA	NA	-999	1981-01-01	1981	-21.5	272.9	2.7	1.2777	0.0027	...	tree	single_tree_ring
NIK	NZA	58651	NA	NA	-999	1981-01-01	1981	-21.4	262.7	2.6	1.2674	0.0027	...	tree	single_tree_ring
NIK	NZA	59408	NA	NA	-999	1984-01-01	1984	-20.6	223.5	2.6	1.2285	0.0026	...	tree	single_tree_ring
BHD	NZA	56916	NA	NA	-999	1985-01-01	1985	-23.7	203.4	2.4	1.2085	0.0024	...	tree	single_tree_ring
BHD	NZA	56188	NA	NA	-999	1986-01-01	1986	-24.5	196	1.7	1.2012	0.0017	...	tree	single_tree_ring
NIK	NZA	59944	NA	NA	-999	1986-01-01	1986	-19.7	199.4	2.5	1.2046	0.0026	...	tree	single_tree_ring
BHD	NZA	57195	NA	NA	-999	1987-01-01	1987	-23.9	185.2	2.5	1.1905	0.0025	...	tree	single_tree_ring
BHD	NZA	57192	NA	NA	-999	1987-01-01	1987	-23.8	182	2.8	1.1873	0.0028	...	tree	single_tree_ring
NIK	NZA	60414	NA	NA	-999	1988-01-01	1988	-20.1	179.3	2.5	1.1847	0.0025	...	tree	single_tree_ring
NIK	NZA	59943	NA	NA	-999	1989-01-01	1989	-20.6	161.7	2.5	1.1672	0.0025	...	tree	single_tree_ring
BHD	NZA	57074	NA	NA	-999	1989-01-01	1989	-26.1	167.1	2.4	1.1726	0.0024	...	tree	single_tree_ring
BHD	NZA	56914	NA	NA	-999	1990-01-01	1990	-23.6	149.1	2.3	1.1546	0.0023	...	tree	single_tree_ring
NIK	NZA	60413	NA	NA	-999	1991-01-01	1991	-19.9	151.8	2.4	1.1575	0.0024	...	tree	single_tree_ring
BHD	NZA	57073	NA	NA	-999	1991-01-01	1991	-24	147.9	2.3	1.1537	0.0023	...	tree	single_tree_ring
NIK	NZA	59407	NA	NA	-999	1992-01-01	1992	-20.1	140.6	2.4	1.1464	0.0024	...	tree	single_tree_ring
BHD	NZA	57191	NA	NA	-999	1992-01-01	1992	-23.3	137.9	2.5	1.1437	0.0025	...	tree	single_tree_ring
BHD	NZA	57072	NA	NA	-999	1993-01-01	1993	-25.8	135.5	2.3	1.1414	0.0023	...	tree	single_tree_ring
NIK	NZA	58650	NA	NA	-999	1993-01-01	1993	-20.5	133.7	2.4	1.1397	0.0024	...	tree	single_tree_ring
NIK	NZA	58642	NA	NA	-999	1993-01-01	1993	-22.7	130.1	2.4	1.136	0.0024	...	tree	single_tree_ring
BHD	NZA	57076	NA	NA	-999	1993-01-01	1993	-24.9	133.8	2.3	1.1398	0.0023	...	tree	single_tree_ring
BHD	NZA	56913	NA	NA	-999	1994-01-01	1994	-24.3	119.3	2.2	1.1253	0.0023	...	tree	single_tree_ring
BHD	NZA	57190	NA	NA	-999	1996-01-01	1996	-25	113.8	2.4	1.1201	0.0024	...	tree	single_tree_ring
NIK	NZA	59621	NA	NA	-999	1997-01-01	1997	-20.8	102.4	2.4	1.1087	0.0024	...	tree	single_tree_ring
BHD	NZA	57071	NA	NA	-999	1997-01-01	1997	-25.1	104.3	2.3	1.1106	0.0023	...	tree	single_tree_ring
BHD	NZA	56912	NA	NA	-999	1998-01-01	1998	-24.5	104	2.2	1.1104	0.0022	...	tree	single_tree_ring
BHD	NZA	57189	NA	NA	-999	1999-01-01	1999	-22.9	98.8	2.3	1.1053	0.0024	...	tree	single_tree_ring
NIK	NZA	59620	NA	NA	-999	1999-01-01	1999	-20.6	99.8	2.4	1.1063	0.0024	...	tree	single_tree_ring
BHD	NZA	57194	NA	NA	-999	1999-01-01	1999	-23.6	101.3	2.4	1.1079	0.0024	...	tree	single_tree_ring
NIK	NZA	58641	NA	NA	-999	2000-01-01	2000	-23.1	88.5	2.3	1.0951	0.0023	...	tree	single_tree_ring
NIK	NZA	58649	NA	NA	-999	2000-01-01	2000	-21.2	88.9	2.3	1.0955	0.0023	...	tree	single_tree_ring
BHD	NZA	57070	NA	NA	-999	2001-01-01	2001	-22.6	84.2	2.2	1.0909	0.0022	...	tree	single_tree_ring
NIK	NZA	59942	NA	NA	-999	2001-01-01	2001	-21.3	85.5	2.3	1.0922	0.0023	...	tree	single_tree_ring
NIK	NZA	60411	NA	NA	-999	2002-01-01	2002	-21.1	78.8	2.4	1.0856	0.0024	...	tree	single_tree_ring
BHD	NZA	56911	NA	NA	-999	2002-01-01	2002	-23.8	79.6	2.2	1.0864	0.0022	...	tree	single_tree_ring
BHD	NZA	56917	NA	NA	-999	2002-01-01	2002	-24.4	79.9	2.2	1.0867	0.0022	...	tree	single_tree_ring
NIK	NZA	59619	NA	NA	-999	2003-01-01	2003	-21.4	74.6	2.3	1.0815	0.0023	...	tree	single_tree_ring
BHD	NZA	57188	NA	NA	-999	2003-01-01	2003	-22.9	73.5	2.3	1.0804	0.0023	...	tree	single_tree_ring
BHD	NZA	57069	NA	NA	-999	2004-01-01	2004	-24.3	68.6	2.2	1.0756	0.0022	...	tree	single_tree_ring
NIK	NZA	59941	NA	NA	-999	2005-01-01	2005	-21.5	67.2	2.3	1.0744	0.0023	...	tree	single_tree_ring
BHD	NZA	56910	NA	NA	-999	2005-01-01	2005	-23.9	72.6	2.1	1.0797	0.0022	...	tree	single_tree_ring
NIK	NZA	59945	NA	NA	-999	2007-01-01	2007	-22.3	58.3	2.3	1.0656	0.0023	...	tree	single_tree_ring
BHD	NZA	57193	NA	NA	-999	2008-01-01	2008	-23.3	53	2.3	1.0604	0.0023	...	tree	single_tree_ring
NIK	NZA	58648	NA	NA	-999	2008-01-01	2008	-23.1	55.8	2.3	1.0633	0.0023	...	tree	single_tree_ring
NIK	NZA	58656	NA	NA	-999	2008-01-01	2008	-22	53.9	2.3	1.0613	0.0023	...	tree	single_tree_ring
BHD	NZA	57075	NA	NA	-999	2010-01-01	2010	-22.7	46.9	2.1	1.0546	0.0022	...	tree	single_tree_ring
NIK	NZA	60422	NA	NA	-999	2010-01-01	2010	-21.7	43.1	2.3	1.0507	0.0023	...	tree	single_tree_ring
NIK	NZA	60415	NA	NA	-999	2011-01-01	2011	-22.1	40.4	2.2	1.0481	0.0022	...	tree	single_tree_ring
BHD	NZA	56915	NA	NA	-999	2012-01-01	2012	-24.5	34.5	2.1	1.0423	0.0021	...	tree	single_tree_ring
NIK	NZA	59622	NA	NA	-999	2012-01-01	2012	-21.4	38	2.3	1.0458	0.0023	...	tree	single_tree_ring

## Sheet: WLG_REMOVED_DATA
WLG 14CO2 REMOVED DATA PROVIDED FOR INFORMATION ONLY
This sheet contains 14CO2 measurements from the WLG dataset that have been INVALIDATED
These data are included for full transparency BUT WE DO NOT RECOMMEND USE OF THESE DATA IN ANY ENVIRONMENTAL STUDY
Users should refer to Turnbull et al., (in press) and associated supplementary material for details of sampling methods and description of why these data have been removed from the main dataset
This work must be cited appropriately in any publication, presentation or other use or distribution of the dataset. Please contact Jocelyn Turnbull (j.turnbull@gns.cri.nz) prior to use.
SITE	NZPREFIX	NZ	DATE_ST	DATE_END	DAYS_EXP	DATE_COLL	DECIMAL_DATE	DELTA13C_IRMS	DELTA14C	DELTA14C_ERR	F14C	F14C_ERR	FLAG	METH_VESSEL	METH_COLL
MAK	NZ	5730	1977-10-01	NA	-999	1977-10-01	1977.75	-28.1	335.2	4.5	1.3396	0.0045	.FD	tray	NaOH_static
BHD	NZ	7820	1989-04-18	1989-04-26	8	1989-04-22	1989.31	-24.8	196.4	3.6	1.2021	0.0036	.FD	tray	NaOH_static
BHD	NZ	7826	1989-11-01	1989-11-08	7	1989-11-04	1989.84	-26.5	194.2	3.9	1.2	0.0039	.FD	tray	NaOH_static
BHD	NZ	7829	1990-02-15	1990-02-22	7	1990-02-18	1990.13	-23.7	173.9	3.5	1.1796	0.0035	.AD	tray	NaOH_static
BHD	NZ	7830	1990-03-16	1990-03-23	7	1990-03-19	1990.21	-24.6	119.4	4.4	1.1249	0.0044	.AD	tray	NaOH_static
BHD	NZ	7831	1990-04-18	1990-04-26	8	1990-04-22	1990.31	-27.5	164.2	3.8	1.1699	0.0038	.AD	tray	NaOH_static
BHD	NZ	7833	1990-07-08	1990-07-16	8	1990-07-12	1990.53	-23.4	160.5	3.9	1.1662	0.0039	.AD	tray	NaOH_static
BHD	NZ	7834	1990-08-13	1990-08-20	7	1990-08-16	1990.62	-25.4	159	4.7	1.1647	0.0047	.AD	tray	NaOH_static
BHD	NZ	7835	1990-09-14	1990-09-21	7	1990-09-17	1990.71	-24.6	162.3	3.3	1.168	0.0033	.AD	tray	NaOH_static
BHD	NZ	7842	1990-11-06	1990-11-13	7	1990-11-09	1990.86	-26.7	162.9	4.8	1.1687	0.0048	.AD	tray	NaOH_static
BHD	NZ	7843	1990-12-10	1990-12-19	9	1990-12-14	1990.95	-24.2	162.9	3.5	1.1687	0.0035	.AD	tray	NaOH_static
BHD	NZ	7844	1991-01-09	1991-01-21	12	1991-01-15	1991.04	-23.8	154.2	3.8	1.1599	0.0038	.AD	tray	NaOH_static
BHD	NZ	7845	1991-02-13	1991-02-22	9	1991-02-17	1991.13	-23	157.1	4.1	1.1629	0.0041	.AD	tray	NaOH_static
BHD	NZ	7846	1991-03-14	1991-03-22	8	1991-03-18	1991.21	-25.7	169	3.6	1.1748	0.0036	.AD	tray	NaOH_static
BHD	NZ	7847	1991-04-25	1991-05-03	8	1991-04-29	1991.32	-26	164.9	11.9	1.1707	0.0119	.AD	tray	NaOH_static
BHD	NZ	7867	1991-05-16	1991-05-29	13	1991-05-22	1991.39	-24.9	162.9	6.7	1.1687	0.0067	.AD	tray	NaOH_static
BHD	NZ	7868	1991-06-14	1991-06-26	12	1991-06-20	1991.47	-22.2	164.1	3.4	1.17	0.0034	.AD	tray	NaOH_static
BHD	NZ	7869	1991-07-13	1991-07-26	13	1991-07-19	1991.55	-22.8	162.5	5.7	1.1684	0.0057	.AD	tray	NaOH_static
BHD	NZ	7870	1991-08-26	1991-09-07	12	1991-09-01	1991.67	-21	158.3	3.3	1.1642	0.0033	.AD	tray	NaOH_static
BHD	NZ	7871	1991-09-13	1991-09-25	12	1991-09-19	1991.72	-22.7	155.4	3.5	1.1612	0.0035	.AD	tray	NaOH_static
BHD	NZ	7872	1991-10-10	1991-10-24	14	1991-10-17	1991.79	-23.4	162.6	2.9	1.1685	0.0029	.AD	tray	NaOH_static
BHD	NZ	7904	1991-11-29	1991-12-13	14	1991-12-06	1991.93	-24.4	149.9	3.6	1.1557	0.0036	.AD	tray	NaOH_static
BHD	NZ	7905	1992-01-24	1992-01-31	7	1992-01-27	1992.07	-24.2	155.9	4.5	1.1618	0.0045	.AD	tray	NaOH_static
BHD	NZ	7906	1992-02-19	1992-02-26	7	1992-02-22	1992.14	-24	156.5	3.2	1.1624	0.0032	.AD	tray	NaOH_static
BHD	NZ	7907	1992-04-01	1992-04-09	8	1992-04-05	1992.26	-22.9	161.3	2.7	1.1673	0.0027	.AD	tray	NaOH_static
BHD	NZ	7908	1992-04-24	1992-05-07	13	1992-04-30	1992.33	-21.2	165.5	3.2	1.1715	0.0032	.AD	tray	NaOH_static
BHD	NZ	7909	1992-05-21	1992-06-03	13	1992-05-27	1992.4	-22.3	142.6	5.7	1.1485	0.0057	.AD	tray	NaOH_static
BHD	NZ	7981	1992-07-15	1992-08-12	28	1992-07-29	1992.58	-24.5	161	6	1.167	0.006	.AD	tray	NaOH_static
BHD	NZ	7982	1992-08-19	1992-08-27	8	1992-08-23	1992.64	-25.6	139	4.5	1.1449	0.0045	.AD	tray	NaOH_static
BHD	NZ	7983	1992-10-03	1992-10-14	11	1992-10-08	1992.77	-21.2	149.2	4.8	1.1552	0.0048	.AD	tray	NaOH_static
BHD	NZ	8005	1992-10-16	1992-11-10	25	1992-10-28	1992.82	-18.9	143.4	3.2	1.1493	0.0032	.AD	tray	NaOH_static
BHD	NZ	8006	1992-12-18	1993-01-26	39	1993-01-06	1993.02	-18.1	146.6	3.8	1.1526	0.0038	.AD	tray	NaOH_static
BHD	NZ	8007	1993-02-15	1993-03-03	16	1993-02-23	1993.15	-21.1	140.3	2.9	1.1463	0.0029	.AD	tray	NaOH_static
BHD	NZ	8075	1993-10-21	1993-11-12	22	1993-11-01	1993.83	-22.6	96.6	4	1.1024	0.004	.F.	tray	NaOH_static
BHD	NZA	9382	1996-06-15	NA	-999	1996-06-22	1996.47	-20.9	138	4.2	1.1444	0.0042	.FD	bottle	NaOH_static
BHD	NZA	59823	1997-05-02	1997-05-27	25	1997-05-14	1997.37	-15	151.6	2	1.1582	0.002	.F.	bottle	NaOH_static
BHD	NZA	11190	1997-07-08	1997-07-21	13	1997-07-14	1997.53	-20.5	80.4	3.4	1.0866	0.0034	.FD	bottle	NaOH_static
BHD	NZA	14567	2000-01-22	2000-02-05	14	2000-01-29	2000.08	-22.1	72.8	3.3	1.0793	0.0033	.FD	bottle	NaOH_static
BHD	NZA	60280	2002-10-17	2002-11-15	29	2002-10-31	2002.83	-15.7	153.1	2	1.1605	0.0021	.F.	bottle	NaOH_static
BHD	NZA	39197	2009-08-12	2009-08-28	16	2009-08-20	2009.63	-15.6	66.9	1.9	1.0746	0.0019	.F.	bottle	NaOH_static
BHD	NZA	56826	2013-07-23	2013-08-07	15	2013-07-30	2013.58	-13.7	18.3	1.9	1.0261	0.0019	.FD	bottle	NaOH_static
BHD	NZA	56832	2014-02-11	2014-02-24	13	2014-02-17	2014.13	-12.9	53.3	1.9	1.0615	0.002	.FD	bottle	NaOH_static

## Sheet: WLG_MONTHLY_SMOOTH_CURVE
WLG_MONTHLY_SMOOTH_CURVE
ccgvu (Thoning et al., 1989) used to fit the Wellington 14CO2 record WLG_FINAL_SCREENED_DATA
curve fits have been interpolated from the raw measurements to provide monthly resolution
D14C = DELTA14C, decay corrected to the date of collection, normalised to delta13C of -25 permil
F14C = fraction modern, normalised to delta13C of -25 permil without decay correction
trend is the deseasonalised trend derived using the full Wellington 14CO2 dataset
fit is the curve fitted to the Wellington 14CO2 data, performed in five separate increments (1954-1965, 1966-1979,1980-1989,1990-2004,2005-2015) to allow the seasonal cycle to vary through time
the sections have been spliced together by interpolating across two year periods
errors for trend and fit were determined from a Monte Carlo simulation of the curve fits using the assigned measurement uncertainties for each data point
Date	D14C_trend	D14C_trend_err	D14C_fit	D14C_fit_err	F14C_trend	F14C_trend_err	F14C_fit	F14C_fit_err
1954.96	-11.5321	3.68978	-18.2589	5.28813	0.989061	0.00368978	0.98233	0.00528813
1955.04	-11.5613	3.48348	-8.68546	4.44839	0.989042	0.00348348	0.991919	0.00444839
1955.12	-11.4096	3.25923	-5.688	4.88027	0.989203	0.00325923	0.994929	0.00488027
1955.21	-11.0365	3.02874	-7.55059	5.04834	0.989587	0.00302874	0.993075	0.00504834
1955.29	-10.4069	2.80456	-8.91169	4.45737	0.990227	0.00280456	0.991723	0.00445737
1955.38	-9.49864	2.60009	-6.53717	3.9944	0.991146	0.00260009	0.994109	0.0039944
1955.46	-8.29979	2.42578	-2.57459	3.97647	0.992355	0.00242578	0.998084	0.00397647
1955.54	-6.81169	2.28842	-1.9734	3.76867	0.993854	0.00228842	0.998696	0.00376867
1955.62	-5.0559	2.18954	-6.77329	3.23757	0.995621	0.00218954	0.993903	0.00323757
1955.71	-3.06353	2.12487	-13.224	3.02283	0.997625	0.00212487	0.987458	0.00302283
1955.79	-0.87696	2.0872	-15.0012	3.66028	0.999823	0.0020872	0.985689	0.00366028
1955.88	1.4435	2.06805	-9.41444	4.44298	1.00216	0.00206805	0.99129	0.00444298
1955.96	3.83912	2.06054	-0.18455	4.47988	1.00456	0.00206054	1.00054	0.00447988
1956.04	6.24965	2.05991	6.3826	3.72961	1.00699	0.00205991	1.00712	0.00372961
1956.12	8.60916	2.06329	7.90202	3.08034	1.00936	0.00206329	1.00865	0.00308034
1956.21	10.8675	2.0691	8.30445	3.17222	1.01163	0.0020691	1.00906	0.00317222
1956.29	12.9855	2.07578	13.3048	3.61444	1.01376	0.00207578	1.01408	0.00361444
1956.38	14.9308	2.08109	23.7037	4.06819	1.01571	0.00208109	1.02449	0.00406819
1956.46	16.6955	2.08199	33.6756	4.21816	1.01749	0.00208199	1.03448	0.00421816
1956.54	18.2882	2.07498	35.9315	4.02157	1.01909	0.00207498	1.03675	0.00402157
1956.62	19.7284	2.05702	28.6692	3.7781	1.02055	0.00205702	1.02949	0.0037781
1956.71	21.0563	2.02594	17.4981	3.39435	1.02189	0.00202594	1.01832	0.00339435
1956.79	22.3235	1.98093	10.666	2.82326	1.02316	0.00198093	1.0115	0.00282326
1956.88	23.5847	1.92361	12.3863	2.63488	1.02444	0.00192361	1.01323	0.00263488
1956.96	24.9028	1.85698	20.0533	2.68569	1.02577	0.00185698	1.02091	0.00268569
1957.04	26.3397	1.78552	27.3255	2.53393	1.02721	0.00178552	1.0282	0.00253393
1957.12	27.9468	1.71449	29.6686	2.54239	1.02883	0.00171449	1.03056	0.00254239
1957.21	29.7712	1.64939	27.7792	2.66678	1.03067	0.00164939	1.02868	0.00266678
1957.29	31.8493	1.59466	26.2232	2.62797	1.03276	0.00159466	1.02713	0.00262797
1957.38	34.1965	1.55373	28.9421	2.69429	1.03512	0.00155373	1.02986	0.00269429
1957.46	36.8212	1.52851	35.6159	2.76529	1.03776	0.00152851	1.03655	0.00276529
1957.54	39.7205	1.51922	42.2838	2.62008	1.04067	0.00151922	1.04324	0.00262008
1957.62	42.8694	1.52519	45.593	2.60443	1.04383	0.00152519	1.04656	0.00260443
1957.71	46.2443	1.54457	46.5054	2.71883	1.04722	0.00154457	1.04748	0.00271883
1957.79	49.818	1.57472	49.3032	2.71868	1.05081	0.00157472	1.05029	0.00271868
1957.88	53.5482	1.61197	56.7815	3.0307	1.05455	0.00161197	1.05779	0.0030307
1957.96	57.4072	1.65218	66.7739	3.63696	1.05843	0.00165218	1.0678	0.00363696
1958.04	61.3724	1.69067	73.9674	3.76803	1.06241	0.00169067	1.07501	0.00376803
1958.12	65.4139	1.72244	75.1901	3.17594	1.06646	0.00172244	1.07625	0.00317594
1958.21	69.5246	1.74335	72.5487	2.52867	1.07059	0.00174335	1.07361	0.00252867
1958.29	73.7064	1.75005	71.0006	2.67932	1.07478	0.00175005	1.07208	0.00267932
1958.38	77.9547	1.74065	73.3779	3.08968	1.07905	0.00174065	1.07447	0.00308968
1958.46	82.2866	1.7152	78.234	3.08315	1.08339	0.0017152	1.07934	0.00308315
1958.54	86.7248	1.67537	82.4756	2.72262	1.08785	0.00167537	1.08359	0.00272262
1958.62	91.2781	1.62485	85.3031	2.39695	1.09242	0.00162485	1.08644	0.00239695
1958.71	95.9704	1.56846	89.0962	2.4057	1.09713	0.00156846	1.09024	0.0024057
1958.79	100.822	1.51187	96.5187	2.6178	1.10199	0.00151187	1.09769	0.0026178
1958.88	105.831	1.46106	107.246	2.60637	1.10702	0.00146106	1.10843	0.00260637
1958.96	111.003	1.4214	117.831	2.3179	1.11221	0.0014214	1.11904	0.0023179
1959.04	116.333	1.39669	124.6	2.29369	1.11755	0.00139669	1.12583	0.00229369
1959.12	121.789	1.38915	126.77	2.63527	1.12303	0.00138915	1.12801	0.00263527
1959.21	127.344	1.39917	127.03	2.85651	1.1286	0.00139917	1.12829	0.00285651
1959.29	132.964	1.42606	129.087	2.91884	1.13424	0.00142606	1.13036	0.00291884
1959.38	138.585	1.46772	134.52	2.90602	1.13988	0.00146772	1.13581	0.00290602
1959.46	144.158	1.52187	141.705	2.76456	1.14547	0.00152187	1.14301	0.00276456
1959.54	149.63	1.58595	147.731	2.68094	1.15096	0.00158595	1.14906	0.00268094
1959.62	154.928	1.65656	151.47	2.78525	1.15627	0.00165656	1.15281	0.00278525
1959.71	160.001	1.7305	154.86	2.94604	1.16136	0.0017305	1.15622	0.00294604
1959.79	164.804	1.8043	160.897	3.0808	1.16618	0.0018043	1.16227	0.0030808
1959.88	169.281	1.8743	170.284	3.04489	1.17068	0.0018743	1.17168	0.00304489
1959.96	173.407	1.93737	180.172	2.96634	1.17482	0.00193737	1.18159	0.00296634
1960.04	177.164	1.99046	186.371	3.17228	1.17859	0.00199046	1.18781	0.00317228
1960.12	180.533	2.03115	187.046	3.43223	1.18198	0.00203115	1.1885	0.00343223
1960.21	183.522	2.0577	184.405	3.58538	1.18498	0.0020577	1.18587	0.00358538
1960.29	186.15	2.06903	182.69	3.83705	1.18763	0.00206903	1.18416	0.00383705
1960.38	188.433	2.0651	184.521	4.11549	1.18993	0.0020651	1.18601	0.00411549
1960.46	190.408	2.04673	188.889	4.11048	1.19191	0.00204673	1.19039	0.00411048
1960.54	192.112	2.01626	192.53	3.65752	1.19363	0.00201626	1.19405	0.00365752
1960.62	193.582	1.9783	193.166	3.06714	1.19512	0.0019783	1.1947	0.00306714
1960.71	194.858	1.9389	191.639	2.936	1.19641	0.0019389	1.19318	0.002936
1960.79	195.978	1.90675	190.978	3.04753	1.19754	0.00190675	1.19253	0.00304753
1960.88	196.972	1.89097	193.395	2.95899	1.19855	0.00189097	1.19497	0.00295899
1960.96	197.867	1.9005	198.07	2.85153	1.19946	0.0019005	1.19966	0.00285153
1961.04	198.68	1.94057	201.955	2.88477	1.20028	0.00194057	1.20356	0.00288477
1961.12	199.422	2.01118	202.781	3.04074	1.20104	0.00201118	1.2044	0.00304074
1961.21	200.099	2.10671	201.16	3.2187	1.20173	0.00210671	1.20279	0.0032187
1961.29	200.713	2.21748	199.439	3.29289	1.20235	0.00221748	1.20108	0.00329289
1961.38	201.261	2.33157	198.788	4.08129	1.20292	0.00233157	1.20044	0.00408129
1961.46	201.744	2.43826	198.106	5.64665	1.20341	0.00243826	1.19977	0.00564665
1961.54	202.167	2.52912	196.237	6.37642	1.20385	0.00252912	1.19791	0.00637642
1961.62	202.539	2.59902	194.683	5.55329	1.20423	0.00259902	1.19636	0.00555329
1961.71	202.881	2.64711	196.937	4.52752	1.20459	0.00264711	1.19863	0.00452752
1961.79	203.227	2.67618	204.602	5.16788	1.20494	0.00267618	1.20632	0.00516788
1961.88	203.623	2.6923	214.515	6.1494	1.20535	0.0026923	1.21626	0.0061494
1961.96	204.128	2.70337	220.606	6.12604	1.20587	0.00270337	1.22237	0.00612604
1962.04	204.819	2.7163	218.861	5.50628	1.20658	0.0027163	1.22064	0.00550628
1962.12	205.779	2.73585	210.751	5.14366	1.20755	0.00273585	1.21253	0.00514366
1962.21	207.105	2.76207	202.04	4.93388	1.20889	0.00276207	1.20382	0.00493388
1962.29	208.9	2.79061	198.404	5.36279	1.2107	0.00279061	1.20019	0.00536279
1962.38	211.264	2.81322	201.678	6.89366	1.21308	0.00281322	1.20348	0.00689366
1962.46	214.299	2.81989	209.384	7.8496	1.21613	0.00281989	1.21121	0.0078496
1962.54	218.106	2.80116	217.544	7.17183	1.21996	0.00280116	1.21939	0.00717183
1962.62	222.761	2.74987	224.168	5.58051	1.22463	0.00274987	1.22604	0.00558051
1962.71	228.337	2.66294	230.625	4.47323	1.23023	0.00266294	1.23252	0.00447323
1962.79	234.898	2.54162	239.49	4.19656	1.23681	0.00254162	1.24141	0.00419656
1962.88	242.465	2.39295	250.998	3.95726	1.2444	0.00239295	1.25295	0.00395726
1962.96	251.065	2.22855	261.957	3.34086	1.25303	0.00222855	1.26394	0.00334086
1963.04	260.708	2.06435	268.568	2.82212	1.2627	0.00206435	1.27057	0.00282212
1963.12	271.357	1.91985	270.632	2.77411	1.27338	0.00191985	1.27265	0.00277411
1963.21	282.992	1.81303	272.85	2.73449	1.28504	0.00181303	1.27488	0.00273449
1963.29	295.585	1.75622	281.51	2.79401	1.29767	0.00175622	1.28357	0.00279401
1963.38	309.052	1.75095	299.418	3.17711	1.31117	0.00175095	1.30152	0.00317711
1963.46	323.347	1.78725	323.476	3.44262	1.3255	0.00178725	1.32563	0.00344262
1963.54	338.423	1.84846	346.811	3.47196	1.34062	0.00184846	1.34902	0.00347196
1963.62	354.169	1.91753	363.791	3.5305	1.3564	0.00191753	1.36604	0.0035305
1963.71	370.526	1.98116	374.472	3.52066	1.3728	0.00198116	1.37675	0.00352066
1963.79	387.432	2.0316	384.406	3.30968	1.38975	0.0020316	1.38672	0.00330968
1963.88	404.757	2.06513	399.754	3.18552	1.40712	0.00206513	1.40211	0.00318552
1963.96	422.424	2.08253	421.627	3.17736	1.42483	0.00208253	1.42403	0.00317736
1964.04	440.344	2.08693	445.06	3.16446	1.44279	0.00208693	1.44752	0.00316446
1964.12	458.357	2.0828	464.17	3.53061	1.46085	0.0020828	1.46667	0.00353061
1964.21	476.351	2.07479	478.591	4.12696	1.47889	0.00207479	1.48113	0.00412696
1964.29	494.203	2.06737	493.323	4.28547	1.49679	0.00206737	1.49591	0.00428547
1964.38	511.712	2.06362	511.783	3.98257	1.51434	0.00206362	1.51441	0.00398257
1964.46	528.735	2.0659	530.271	3.72015	1.53141	0.0020659	1.53295	0.00372015
1964.54	545.119	2.07529	541.43	3.67773	1.54784	0.00207529	1.54414	0.00367773
1964.62	560.652	2.09222	544.179	3.69883	1.56342	0.00209222	1.54691	0.00369883
1964.71	575.188	2.11667	548.429	3.65553	1.57799	0.00211667	1.55119	0.00365553
1964.79	588.587	2.14796	566.931	3.57869	1.59143	0.00214796	1.56974	0.00357869
1964.88	600.68	2.18487	601.269	3.98372	1.60356	0.00218487	1.60415	0.00398372
1964.96	611.376	2.22558	637.378	4.85776	1.61429	0.00222558	1.64034	0.00485776
1965.04	620.605	2.2676	656.737	5.99239	1.62356	0.0022676	1.65975	0.00599239
1965.12	628.303	2.30758	653.073	6.00659	1.63129	0.00230758	1.6561	0.00600659
1965.21	634.478	2.34205	638.276	4.96103	1.63749	0.00234205	1.64129	0.00496103
1965.29	639.168	2.36767	630.19	4.03775	1.6422	0.00236767	1.63321	0.00403775
1965.38	642.438	2.38122	636.157	3.80942	1.6455	0.00238122	1.6392	0.00380942
1965.46	644.4	2.38079	647.999	4.20296	1.64748	0.00238079	1.65108	0.00420296
1965.54	645.19	2.36535	652.272	4.38942	1.64829	0.00236535	1.65538	0.00438942
1965.62	644.965	2.33531	643.966	4.14838	1.64808	0.00233531	1.64708	0.00414838
1965.71	643.899	2.29271	630.348	3.8832	1.64703	0.00229271	1.63345	0.0038832
1965.79	642.164	2.24021	622.777	4.04204	1.6453	0.00224021	1.62588	0.00404204
1965.88	639.938	2.18203	626.243	4.22182	1.64309	0.00218203	1.62937	0.00422182
1965.96	637.382	2.12249	636.274	4.15665	1.64055	0.00212249	1.63944	0.00415665
1966.04	634.636	2.06573	644.379	4.06412	1.63781	0.00206573	1.64757	0.00406412
1966.12	631.826	2.01552	645.126	3.78412	1.63501	0.00201552	1.64834	0.00378412
1966.21	629.044	1.97413	638.854	3.17177	1.63224	0.00197413	1.64207	0.00317177
1966.29	626.353	1.94262	629.242	3.36959	1.62956	0.00194262	1.63246	0.00336959
1966.38	623.797	1.92064	619.823	3.72552	1.62702	0.00192064	1.62304	0.00372552
1966.46	621.387	1.90688	612.464	3.90352	1.62462	0.00190688	1.61568	0.00390352
1966.54	619.113	1.89938	608.105	3.88437	1.62236	0.00189938	1.61133	0.00388437
1966.62	616.955	1.89678	607.528	3.64843	1.62021	0.00189678	1.61076	0.00364843
1966.71	614.871	1.89792	610.763	3.2978	1.61814	0.00189792	1.61402	0.0032978
1966.79	612.815	1.90271	616.093	3.23861	1.61609	0.00190271	1.61938	0.00323861
1966.88	610.746	1.91148	620.275	3.5789	1.61404	0.00191148	1.62359	0.0035789
1966.96	608.615	1.92466	620.59	4.00336	1.61192	0.00192466	1.62392	0.00400336
1967.04	606.38	1.94263	616.782	4.41825	1.6097	0.00194263	1.62012	0.00441825
1967.12	604.015	1.96459	610.941	4.57394	1.60734	0.00196459	1.61428	0.00457394
1967.21	601.494	1.9886	605.226	4.13939	1.60483	0.0019886	1.60857	0.00413939
1967.29	598.802	2.01169	599.866	3.88976	1.60215	0.00201169	1.60322	0.00388976
1967.38	595.941	2.02983	593.518	3.93131	1.5993	0.00202983	1.59687	0.00393131
1967.46	592.915	2.03893	585.465	4.33033	1.59628	0.00203893	1.58882	0.00433033
1967.54	589.733	2.03493	577.277	4.57343	1.59311	0.00203493	1.58063	0.00457343
1967.62	586.423	2.01519	572.122	4.58748	1.58981	0.00201519	1.57548	0.00458748
1967.71	583.007	1.97836	572.231	4.40437	1.5864	0.00197836	1.5756	0.00440437
1967.79	579.51	1.92494	576.907	4.17803	1.58291	0.00192494	1.5803	0.00417803
1967.88	575.972	1.85726	582.532	4.37783	1.57938	0.00185726	1.58596	0.00437783
1967.96	572.423	1.77959	584.766	3.54122	1.57584	0.00177959	1.58821	0.00354122
1968.04	568.892	1.69731	581.801	3.34241	1.57232	0.00169731	1.58526	0.00334241
1968.12	565.423	1.61701	574.834	3.23158	1.56886	0.00161701	1.57829	0.00323158
1968.21	562.045	1.54472	567.009	3.31096	1.56549	0.00154472	1.57046	0.00331096
1968.29	558.787	1.48547	560.897	3.3388	1.56224	0.00148547	1.56435	0.0033388
1968.38	555.685	1.44265	556.56	3.05595	1.55915	0.00144265	1.56002	0.00305595
1968.46	552.762	1.41688	552.073	2.71058	1.55623	0.00141687	1.55554	0.00271058
1968.54	550.033	1.40671	546.114	2.6923	1.55351	0.00140671	1.54959	0.0026923
1968.62	547.522	1.40954	539.759	2.68168	1.55101	0.00140954	1.54323	0.00268168
1968.71	545.233	1.42223	535.484	2.47839	1.54873	0.00142223	1.53896	0.00247839
1968.79	543.162	1.44163	534.778	2.48877	1.54667	0.00144163	1.53827	0.00248877
1968.88	541.307	1.46545	537.001	2.67615	1.54483	0.00146545	1.54051	0.00267615
1968.96	539.647	1.49193	540.369	2.65899	1.54318	0.00149193	1.54391	0.00265899
1969.04	538.157	1.51928	543.318	2.6745	1.5417	0.00151928	1.54688	0.0026745
1969.12	536.809	1.54605	544.641	2.94946	1.54037	0.00154605	1.54822	0.00294946
1969.21	535.562	1.57064	543.24	3.04688	1.53913	0.00157064	1.54683	0.00304688
1969.29	534.374	1.59169	538.848	2.90442	1.53796	0.00159169	1.54244	0.00290442
1969.38	533.207	1.60813	533.242	3.02085	1.5368	0.00160813	1.53684	0.00302085
1969.46	532.018	1.61949	529.6	3.26438	1.53563	0.00161949	1.5332	0.00326438
1969.54	530.769	1.62613	529.686	3.24264	1.53439	0.00162613	1.53331	0.00324264
1969.62	529.43	1.62889	531.621	3.27486	1.53306	0.00162889	1.53526	0.00327486
1969.71	527.978	1.62931	531.281	3.61887	1.53162	0.00162931	1.53494	0.00361887
1969.79	526.396	1.62897	526.453	3.90268	1.53005	0.00162897	1.53011	0.00390268
1969.88	524.685	1.62938	519.466	3.9941	1.52836	0.00162938	1.52312	0.0039941
1969.96	522.85	1.63154	515.202	4.0743	1.52653	0.00163154	1.51886	0.0040743
1970.04	520.906	1.63544	516.454	4.06267	1.5246	0.00163544	1.52013	0.00406267
1970.12	518.882	1.64056	521.27	3.74868	1.52258	0.00164056	1.52498	0.00374868
1970.21	516.806	1.64618	524.842	3.31457	1.52052	0.00164618	1.52857	0.00331457
1970.29	514.714	1.65117	523.69	3.1727	1.51844	0.00165117	1.52743	0.0031727
1970.38	512.647	1.65496	518.104	3.17025	1.51638	0.00165496	1.52185	0.00317025
1970.46	510.638	1.65749	511.052	3.01117	1.51438	0.00165749	1.5148	0.00301117
1970.54	508.718	1.65952	505.354	2.94253	1.51247	0.00165952	1.5091	0.00294253
1970.62	506.916	1.66236	501.936	2.96522	1.51068	0.00166236	1.50569	0.00296522
1970.71	505.249	1.66776	500.1	2.8451	1.50902	0.00166776	1.50386	0.0028451
1970.79	503.721	1.67748	498.89	2.98311	1.50751	0.00167748	1.50266	0.00298311
1970.88	502.332	1.69277	498.027	3.40593	1.50613	0.00169277	1.50181	0.00340593
1970.96	501.067	1.71407	497.875	3.49182	1.50488	0.00171407	1.50168	0.00349182
1971.04	499.901	1.74081	498.84	3.23423	1.50372	0.00174081	1.50266	0.00323423
1971.12	498.803	1.77128	500.729	3.2076	1.50264	0.00177128	1.50457	0.0032076
1971.21	497.734	1.80297	502.519	3.41643	1.50158	0.00180297	1.50638	0.00341643
1971.29	496.65	1.83324	502.715	3.27371	1.50051	0.00183324	1.50659	0.00327371
1971.38	495.507	1.85944	500.259	2.85631	1.49938	0.00185944	1.50414	0.00285631
1971.46	494.264	1.87983	495.393	2.95092	1.49815	0.00187983	1.49928	0.00295092
1971.54	492.88	1.89407	489.738	3.40996	1.49677	0.00189407	1.49362	0.00340996
1971.62	491.327	1.90331	485.402	3.59653	1.49523	0.00190331	1.48929	0.00359653
1971.71	489.584	1.91027	483.652	3.59112	1.4935	0.00191027	1.48755	0.00359112
1971.79	487.635	1.9193	484.242	3.59838	1.49156	0.0019193	1.48816	0.00359838
1971.88	485.486	1.93495	485.708	3.50966	1.48942	0.00193495	1.48964	0.00350966
1971.96	483.147	1.96121	486.341	3.36666	1.48709	0.00196121	1.49029	0.00336666
1972.04	480.635	2.00054	485.136	3.53395	1.48459	0.00200054	1.4891	0.00353395
1972.12	477.985	2.05231	482.233	3.88464	1.48195	0.00205231	1.4862	0.00388464
1972.21	475.229	2.11333	478.591	3.82953	1.4792	0.00211333	1.48257	0.00382953
1972.29	472.402	2.17853	475.073	3.47907	1.47638	0.00217853	1.47906	0.00347907
1972.38	469.547	2.24102	471.616	3.63541	1.47353	0.00224102	1.4756	0.00363541
1972.46	466.693	2.29492	467.279	4.24165	1.47068	0.00229492	1.47127	0.00424165
1972.54	463.865	2.33505	461.431	4.68595	1.46786	0.00233505	1.46542	0.00468595
1972.62	461.086	2.35824	454.974	4.80109	1.46509	0.00235824	1.45896	0.00480109
1972.71	458.362	2.36364	450.093	4.55459	1.46237	0.00236364	1.45408	0.00455459
1972.79	455.687	2.35239	448.517	3.9532	1.45971	0.00235239	1.45252	0.0039532
1972.88	453.054	2.3276	449.808	3.3065	1.45708	0.0023276	1.45383	0.0033065
1972.96	450.44	2.29328	451.555	3.0717	1.45447	0.00229328	1.45559	0.0030717
1973.04	447.814	2.25354	451.429	3.21174	1.45185	0.00225354	1.45548	0.00321174
1973.12	445.154	2.21225	449.004	3.36831	1.4492	0.00221225	1.45306	0.00336831
1973.21	442.428	2.17148	445.509	3.53103	1.44648	0.00217148	1.44957	0.00353103
1973.29	439.608	2.13152	442.018	3.83469	1.44367	0.00213152	1.44609	0.00383469
1973.38	436.686	2.09129	438.393	4.03821	1.44075	0.00209129	1.44247	0.00403821
1973.46	433.653	2.04822	434.095	3.81236	1.43773	0.00204822	1.43817	0.00381236
1973.54	430.513	1.99951	429.593	3.24031	1.43459	0.00199951	1.43367	0.00324031
1973.62	427.292	1.94329	426.24	2.68902	1.43138	0.00194329	1.43032	0.00268902
1973.71	424.02	1.87823	424.65	2.39987	1.42811	0.00187823	1.42874	0.00239987
1973.79	420.737	1.80518	423.896	2.38714	1.42483	0.00180518	1.428	0.00238714
1973.88	417.501	1.7269	422.625	2.40392	1.4216	0.0017269	1.42674	0.00240392
1973.96	414.363	1.64786	420.499	2.25271	1.41847	0.00164786	1.42462	0.00225271
1974.04	411.375	1.57338	417.805	2.16742	1.41549	0.00157338	1.42193	0.00216742
1974.12	408.593	1.50988	413.907	2.32949	1.41271	0.00150988	1.41804	0.00232949
1974.21	406.053	1.46254	407.228	2.42189	1.41018	0.00146254	1.41135	0.00242189
1974.29	403.78	1.43417	397.622	2.27696	1.40791	0.00143417	1.40174	0.00227696
1974.38	401.79	1.42476	388.273	2.2041	1.40593	0.00142476	1.39237	0.0022041
1974.46	400.075	1.43074	383.865	2.4865	1.40422	0.00143074	1.38796	0.0024865
1974.54	398.61	1.4465	386.459	2.85966	1.40277	0.0014465	1.39058	0.00285966
1974.62	397.359	1.46557	393.303	3.10064	1.40153	0.00146557	1.39746	0.00310064
1974.71	396.268	1.48235	399.216	3.22874	1.40045	0.00148235	1.4034	0.00322874
1974.79	395.275	1.49286	401.032	3.14579	1.39947	0.00149286	1.40524	0.00314579
1974.88	394.315	1.49529	399.589	2.8334	1.39852	0.00149529	1.40381	0.0028334
1974.96	393.32	1.49011	397.803	2.61464	1.39753	0.00149011	1.40203	0.00261464
1975.04	392.227	1.47998	397.412	2.54964	1.39645	0.00147998	1.40165	0.00254964
1975.12	390.983	1.46875	397.783	2.41736	1.39522	0.00146875	1.40204	0.00241736
1975.21	389.547	1.4611	397.23	2.3924	1.39379	0.0014611	1.4015	0.00239239
1975.29	387.888	1.46091	394.741	2.50941	1.39214	0.00146091	1.39901	0.00250941
1975.38	386	1.47048	390.333	2.48962	1.39026	0.00147048	1.39461	0.00248962
1975.46	383.885	1.48968	384.369	2.38838	1.38815	0.00148968	1.38864	0.00238838
1975.54	381.559	1.51636	377.348	2.45809	1.38583	0.00151636	1.38161	0.00245809
1975.62	379.058	1.54633	370.533	2.75782	1.38334	0.00154633	1.37479	0.00275782
1975.71	376.418	1.57471	366.023	2.95494	1.38071	0.00157471	1.37028	0.00295494
1975.79	373.682	1.59684	365.41	2.69208	1.37797	0.00159684	1.36968	0.00269208
1975.88	370.9	1.60903	367.911	2.38834	1.3752	0.00160903	1.3722	0.00238834
1975.96	368.116	1.60913	370.303	2.63086	1.37242	0.00160913	1.37461	0.00263086
1976.04	365.363	1.59675	369.437	2.71266	1.36967	0.00159675	1.37376	0.00271266
1976.12	362.682	1.57359	365.106	2.3803	1.36699	0.00157359	1.36943	0.0023803
1976.21	360.09	1.54298	360.212	2.42786	1.36441	0.00154298	1.36453	0.00242786
1976.29	357.6	1.51013	357.839	2.76998	1.36192	0.00151013	1.36216	0.00276998
1976.38	355.222	1.48066	358.211	2.91173	1.35955	0.00148066	1.36255	0.00291173
1976.46	352.95	1.46044	358.638	3.19616	1.35729	0.00146044	1.36299	0.00319616
1976.54	350.772	1.45363	356.346	3.68244	1.35512	0.00145363	1.36071	0.00368244
1976.62	348.679	1.46181	351.108	4.01593	1.35303	0.00146181	1.35547	0.00401593
1976.71	346.653	1.48398	345.136	4.04361	1.35101	0.00148398	1.34949	0.00404361
1976.79	344.675	1.51626	340.849	3.63962	1.34904	0.00151626	1.3452	0.00363962
1976.88	342.737	1.55381	338.979	2.96548	1.34711	0.00155381	1.34334	0.00296548
1976.96	340.825	1.59202	338.54	2.78856	1.3452	0.00159202	1.34291	0.00278856
1977.04	338.933	1.62816	338.225	3.29903	1.34332	0.00162816	1.34261	0.00329903
1977.12	337.062	1.66144	337.555	3.71033	1.34146	0.00166144	1.34195	0.00371033
1977.21	335.216	1.69339	336.827	3.59946	1.33962	0.00169339	1.34123	0.00359946
1977.29	333.4	1.72726	336.212	3.15713	1.33781	0.00172726	1.34063	0.00315713
1977.38	331.63	1.76676	335.105	2.93329	1.33605	0.00176676	1.33953	0.00293329
1977.46	329.915	1.81451	332.545	2.94686	1.33434	0.00181451	1.33698	0.00294686
1977.54	328.269	1.87109	328.402	2.80207	1.3327	0.00187109	1.33283	0.00280207
1977.62	326.706	1.93368	324.042	2.53001	1.33115	0.00193368	1.32847	0.00253001
1977.71	325.235	1.99709	321.455	2.31038	1.32968	0.00199709	1.32589	0.00231038
1977.79	323.858	2.05448	321.531	2.40556	1.32832	0.00205448	1.32598	0.00240556
1977.88	322.58	2.09875	323.171	3.04656	1.32705	0.00209875	1.32764	0.00304656
1977.96	321.393	2.12434	324.242	3.75182	1.32587	0.00212434	1.32873	0.00375182
1978.04	320.286	2.12787	323.408	4.1236	1.32477	0.00212787	1.3279	0.0041236
1978.12	319.245	2.10902	321	4.26523	1.32374	0.00210902	1.3255	0.00426523
1978.21	318.248	2.07076	318.239	4.24406	1.32275	0.00207076	1.32274	0.00424406
1978.29	317.27	2.01911	315.934	3.88133	1.32179	0.00201911	1.32045	0.00388133
1978.38	316.286	1.96225	314.088	3.25068	1.32081	0.00196225	1.31861	0.00325068
1978.46	315.267	1.90888	312.506	2.74642	1.3198	0.00190888	1.31703	0.00274642
1978.54	314.187	1.86613	311.403	2.78529	1.31873	0.00186613	1.31594	0.00278529
1978.62	313.025	1.83811	311.205	3.59075	1.31758	0.00183811	1.31575	0.00359075
1978.71	311.761	1.82382	311.866	4.47969	1.31632	0.00182382	1.31643	0.00447969
1978.79	310.38	1.81841	312.619	4.56826	1.31495	0.00181841	1.3172	0.00456826
1978.88	308.879	1.81435	312.464	3.83132	1.31346	0.00181435	1.31706	0.00383132
1978.96	307.258	1.80401	310.939	3.16652	1.31185	0.00180401	1.31554	0.00316652
1979.04	305.522	1.7813	308.429	3.1497	1.31012	0.0017813	1.31303	0.0031497
1979.12	303.691	1.74348	305.793	3.03071	1.30829	0.00174348	1.3104	0.00303071
1979.21	301.784	1.69128	303.524	2.66207	1.30639	0.00169127	1.30814	0.00266207
1979.29	299.825	1.6289	301.256	2.32624	1.30444	0.0016289	1.30587	0.00232624
1979.38	297.845	1.56373	298.276	2.52077	1.30246	0.00156373	1.3029	0.00252077
1979.46	295.873	1.50427	294.464	2.78133	1.3005	0.00150427	1.29909	0.00278133
1979.54	293.934	1.45866	290.749	2.93363	1.29857	0.00145866	1.29537	0.00293363
1979.62	292.059	1.43235	288.408	3.14386	1.2967	0.00143235	1.29303	0.00314386
1979.71	290.266	1.42578	287.77	2.93213	1.29491	0.00142578	1.29241	0.00293213
1979.79	288.569	1.43494	287.78	2.91729	1.29322	0.00143494	1.29243	0.00291729
1979.88	286.981	1.45231	287.008	2.85539	1.29164	0.00145231	1.29167	0.00285539
1979.96	285.501	1.46949	285.083	2.85398	1.29017	0.00146949	1.28975	0.00285398
1980.04	284.122	1.47945	282.968	2.90463	1.2888	0.00147945	1.28764	0.00290463
1980.12	282.836	1.47744	281.791	2.78628	1.28752	0.00147744	1.28647	0.00278628
1980.21	281.627	1.46204	281.584	2.54152	1.28632	0.00146204	1.28628	0.00254152
1980.29	280.473	1.4347	281.365	2.64735	1.28517	0.0014347	1.28607	0.00264735
1980.38	279.356	1.39993	280.371	3.09086	1.28407	0.00139993	1.28508	0.00309086
1980.46	278.252	1.36381	278.965	3.19764	1.28297	0.00136381	1.28369	0.00319764
1980.54	277.141	1.33342	278.171	2.90088	1.28187	0.00133342	1.2829	0.00290088
1980.62	276.007	1.31513	278.354	2.55167	1.28074	0.00131513	1.2831	0.00255167
1980.71	274.837	1.31259	278.492	2.5994	1.27958	0.00131259	1.28325	0.0025994
1980.79	273.618	1.32617	276.943	2.50345	1.27837	0.00132617	1.28171	0.00250345
1980.88	272.351	1.35239	273.079	2.34764	1.27711	0.00135239	1.27784	0.00234764
1980.96	271.032	1.38596	268.166	2.44429	1.2758	0.00138596	1.27292	0.00244429
1981.04	269.663	1.42095	264.574	2.42282	1.27444	0.00142095	1.26933	0.00242282
1981.12	268.256	1.45222	263.754	2.65279	1.27304	0.00145222	1.26852	0.00265279
1981.21	266.816	1.47686	265.108	2.74773	1.27161	0.00147686	1.26989	0.00274773
1981.29	265.352	1.49387	266.578	2.89793	1.27015	0.00149387	1.27138	0.00289793
1981.38	263.876	1.50474	266.361	3.21313	1.26868	0.00150474	1.27118	0.00321313
1981.46	262.397	1.51212	264.203	3.32271	1.26721	0.00151212	1.26902	0.00332271
1981.54	260.918	1.51949	261.193	3.06058	1.26574	0.00151949	1.26601	0.00306058
1981.62	259.45	1.52953	258.613	2.73676	1.26428	0.00152953	1.26344	0.00273676
1981.71	257.995	1.5435	256.955	2.61155	1.26283	0.0015435	1.26179	0.00261155
1981.79	256.554	1.56044	255.859	2.65609	1.2614	0.00156044	1.2607	0.00265609
1981.88	255.129	1.57734	254.674	2.91858	1.25998	0.00157734	1.25952	0.00291858
1981.96	253.72	1.59023	253.016	3.3022	1.25858	0.00159023	1.25787	0.0033022
1982.04	252.323	1.59506	250.994	3.4862	1.25719	0.00159506	1.25585	0.0034862
1982.12	250.943	1.58895	249.107	3.43767	1.25581	0.00158895	1.25397	0.00343767
1982.21	249.576	1.57154	247.853	3.35032	1.25445	0.00157154	1.25272	0.00335032
1982.29	248.222	1.54469	247.358	3.10453	1.25311	0.00154469	1.25224	0.00310452
1982.38	246.885	1.51386	247.268	2.57199	1.25178	0.00151386	1.25216	0.00257199
1982.46	245.564	1.48619	247.068	2.26162	1.25046	0.00148619	1.25197	0.00226162
1982.54	244.262	1.47036	246.495	2.52565	1.24917	0.00147036	1.25141	0.00252565
1982.62	242.982	1.47314	245.575	2.84478	1.2479	0.00147314	1.2505	0.00284478
1982.71	241.724	1.49822	244.268	3.1451	1.24665	0.00149822	1.2492	0.0031451
1982.79	240.489	1.54434	242.279	3.48811	1.24542	0.00154434	1.24722	0.00348811
1982.88	239.278	1.606	239.421	3.46439	1.24422	0.001606	1.24436	0.00346439
1982.96	238.089	1.67572	236.138	2.87415	1.24303	0.00167572	1.24108	0.00287415
1983.04	236.916	1.74593	233.488	2.21121	1.24187	0.00174593	1.23843	0.00221121
1983.12	235.758	1.81053	232.439	2.29339	1.24072	0.00181053	1.23739	0.00229339
1983.21	234.608	1.86565	233.117	3.01741	1.23958	0.00186565	1.23808	0.00301741
1983.29	233.458	1.91037	234.799	3.74701	1.23844	0.00191037	1.23978	0.00374701
1983.38	232.306	1.94526	236.437	4.02348	1.23729	0.00194526	1.24144	0.00402348
1983.46	231.143	1.97224	237.107	3.72469	1.23614	0.00197224	1.24212	0.00372469
1983.54	229.966	1.99355	236.055	3.28939	1.23497	0.00199355	1.24108	0.00328939
1983.62	228.773	2.01072	232.854	3.27468	1.23378	0.00201072	1.23788	0.00327468
1983.71	227.563	2.02387	227.945	3.51944	1.23258	0.00202387	1.23296	0.00351944
1983.79	226.337	2.0321	222.997	3.63084	1.23136	0.0020321	1.22801	0.00363084
1983.88	225.103	2.03277	220.172	3.42718	1.23013	0.00203277	1.22518	0.00342718
1983.96	223.865	2.0233	220.363	2.89079	1.2289	0.0020233	1.22539	0.00289079
1984.04	222.631	2.00157	222.186	2.56608	1.22768	0.00200157	1.22723	0.00256608
1984.12	221.413	1.96645	223.05	3.08599	1.22647	0.00196645	1.22811	0.00308599
1984.21	220.22	1.91899	221.636	3.70416	1.22528	0.00191899	1.2267	0.00370416
1984.29	219.058	1.86212	219.182	3.69851	1.22413	0.00186212	1.22425	0.00369851
1984.38	217.94	1.80113	218.034	3.14897	1.22301	0.00180113	1.22311	0.00314897
1984.46	216.869	1.74283	218.904	2.67694	1.22195	0.00174283	1.224	0.00267694
1984.54	215.847	1.69427	219.938	2.75916	1.22094	0.00169427	1.22505	0.00275916
1984.62	214.878	1.66158	218.704	2.98662	1.21998	0.00166158	1.22382	0.00298662
1984.71	213.957	1.64765	214.924	2.84254	1.21906	0.00164765	1.22004	0.00284254
1984.79	213.078	1.65168	210.827	2.31656	1.21819	0.00165168	1.21593	0.00231656
1984.88	212.235	1.66895	208.807	1.88393	1.21736	0.00166895	1.21392	0.00188393
1984.96	211.416	1.69234	208.986	2.00332	1.21655	0.00169234	1.21411	0.00200332
1985.04	210.61	1.71396	209.403	2.40061	1.21575	0.00171396	1.21454	0.00240061
1985.12	209.807	1.72661	208.409	2.72875	1.21496	0.00172661	1.21355	0.00272875
1985.21	208.995	1.72522	206.543	2.64549	1.21416	0.00172522	1.21169	0.00264549
1985.29	208.165	1.70713	205.866	2.32604	1.21333	0.00170713	1.21103	0.00232604
1985.38	207.31	1.67252	207.531	3.21665	1.21249	0.00167252	1.21271	0.00321665
1985.46	206.426	1.62434	210.219	4.6254	1.21161	0.00162434	1.21542	0.0046254
1985.54	205.508	1.56776	211.164	5.00558	1.2107	0.00156776	1.21638	0.00500558
1985.62	204.561	1.5102	208.769	4.20835	1.20976	0.0015102	1.21399	0.00420835
1985.71	203.585	1.4593	204.235	3.0806	1.20879	0.0014593	1.20945	0.0030806
1985.79	202.584	1.42196	200.501	2.30743	1.2078	0.00142196	1.20571	0.00230743
1985.88	201.567	1.40273	199.55	1.93739	1.20679	0.00140273	1.20477	0.00193739
1985.96	200.538	1.40187	200.655	2.02562	1.20577	0.00140187	1.20589	0.00202562
1986.04	199.502	1.41541	201.298	2.20623	1.20474	0.00141541	1.20655	0.00220623
1986.12	198.467	1.43651	199.652	2.13052	1.20372	0.00143651	1.20491	0.00213052
1986.21	197.433	1.45742	196.169	2.13675	1.20269	0.00145742	1.20142	0.00213675
1986.29	196.4	1.47077	192.881	2.421	1.20166	0.00147077	1.19813	0.002421
1986.38	195.37	1.47123	191.487	2.54565	1.20064	0.00147123	1.19674	0.00254565
1986.46	194.338	1.45567	192.124	2.368	1.19962	0.00145567	1.19739	0.002368
1986.54	193.298	1.42421	193.701	2.19709	1.19858	0.00142421	1.19899	0.00219709
1986.62	192.248	1.37903	194.878	2.28289	1.19754	0.00137903	1.20018	0.00228289
1986.71	191.18	1.325	194.735	2.5084	1.19648	0.001325	1.20005	0.0025084
1986.79	190.091	1.26874	192.954	2.6481	1.1954	0.00126874	1.19827	0.0026481
1986.88	188.979	1.21784	189.967	2.63378	1.19429	0.00121784	1.19529	0.00263378
1986.96	187.845	1.17902	186.925	2.46155	1.19317	0.00117902	1.19224	0.00246155
1987.04	186.69	1.15678	185.075	2.0525	1.19202	0.00115678	1.1904	0.0020525
1987.12	185.525	1.15205	184.759	1.72092	1.19086	0.00115205	1.19009	0.00172092
1987.21	184.358	1.162	185.01	2.04788	1.1897	0.001162	1.19036	0.00204788
1987.29	183.203	1.1809	184.442	2.50383	1.18855	0.0011809	1.1898	0.00250383
1987.38	182.078	1.20231	182.616	2.71897	1.18743	0.00120231	1.18797	0.00271897
1987.46	180.998	1.22043	180.45	2.79132	1.18636	0.00122043	1.18581	0.00279132
1987.54	179.979	1.23135	179.228	2.54549	1.18535	0.00123135	1.1846	0.00254549
1987.62	179.039	1.23311	179.308	1.96291	1.18442	0.00123311	1.18469	0.00196291
1987.71	178.19	1.22651	179.871	1.57646	1.18358	0.00122651	1.18526	0.00157646
1987.79	177.438	1.21393	179.831	1.55798	1.18283	0.00121393	1.18524	0.00155798
1987.88	176.788	1.19936	178.808	1.62591	1.18219	0.00119936	1.18422	0.00162591
1987.96	176.238	1.1874	177.234	1.79849	1.18165	0.0011874	1.18265	0.00179849
1988.04	175.777	1.18216	175.764	1.90183	1.1812	0.00118216	1.18119	0.00190183
1988.12	175.392	1.18636	174.768	1.89494	1.18083	0.00118636	1.1802	0.00189494
1988.21	175.063	1.20033	174.259	1.9487	1.18051	0.00120033	1.1797	0.0019487
1988.29	174.765	1.22174	174.074	1.85274	1.18022	0.00122174	1.17952	0.00185274
1988.38	174.472	1.24658	173.965	1.55891	1.17994	0.00124658	1.17943	0.00155891
1988.46	174.156	1.26952	173.667	1.69955	1.17963	0.00126952	1.17914	0.00169955
1988.54	173.787	1.2855	173.093	2.10362	1.17927	0.0012855	1.17857	0.00210362
1988.62	173.343	1.29023	172.515	2.36041	1.17884	0.00129023	1.17801	0.00236041
1988.71	172.801	1.28065	172.404	2.77019	1.1783	0.00128065	1.17791	0.00277019
1988.79	172.143	1.25522	172.915	3.07347	1.17766	0.00125522	1.17843	0.00307347
1988.88	171.362	1.21416	173.493	2.7784	1.17688	0.00121416	1.17902	0.0027784
1988.96	170.454	1.15914	173.135	2.17912	1.17598	0.00115913	1.17868	0.00217912
1989.04	169.419	1.09305	171.208	1.85655	1.17496	0.00109305	1.17675	0.00185655
1989.12	168.272	1.0197	168.125	1.68027	1.17381	0.0010197	1.17367	0.00168027
1989.21	167.026	0.943535	165.199	1.56205	1.17257	0.000943535	1.17074	0.00156205
1989.29	165.7	0.868906	163.566	1.63173	1.17125	0.000868906	1.16911	0.00163173
1989.38	164.32	0.800172	163.206	1.67716	1.16988	0.000800172	1.16876	0.00167716
1989.46	162.912	0.740902	162.981	1.62886	1.16848	0.000740902	1.16855	0.00162886
1989.54	161.497	0.693647	161.721	1.64031	1.16707	0.000693647	1.16729	0.00164031
1989.62	160.106	0.660254	159.321	1.71442	1.16568	0.000660254	1.16489	0.00171442
1989.71	158.757	0.641357	156.811	1.56732	1.16434	0.000641357	1.16238	0.00156732
1989.79	157.47	0.636728	155.411	1.24902	1.16305	0.000636728	1.16099	0.00124902
1989.88	156.261	0.645134	155.473	1.10482	1.16185	0.000645134	1.16106	0.00110482
1989.96	155.141	0.663907	156.267	1.08083	1.16074	0.000663907	1.16187	0.00108083
1990.04	154.114	0.689751	156.682	1.13117	1.15972	0.000689751	1.1623	0.00113117
1990.12	153.185	0.718536	156.056	1.26678	1.1588	0.000718536	1.16168	0.00126678
1990.21	152.35	0.745728	154.452	1.4811	1.15797	0.000745728	1.16008	0.0014811
1990.29	151.605	0.767311	152.352	1.5713	1.15723	0.000767311	1.15798	0.0015713
1990.38	150.941	0.779693	150.276	1.50639	1.15658	0.000779693	1.15591	0.00150639
1990.46	150.35	0.780458	148.626	1.58562	1.15599	0.000780458	1.15426	0.00158562
1990.54	149.818	0.768517	147.709	1.49108	1.15547	0.000768517	1.15335	0.00149108
1990.62	149.336	0.744292	147.641	1.32886	1.155	0.000744292	1.15329	0.00132886
1990.71	148.891	0.7099	148.159	1.15788	1.15456	0.0007099	1.15383	0.00115788
1990.79	148.468	0.669447	148.648	1.234	1.15415	0.000669447	1.15433	0.001234
1990.88	148.059	0.628439	148.541	1.25021	1.15375	0.000628439	1.15423	0.00125021
1990.96	147.65	0.593634	147.81	1.10891	1.15335	0.000593634	1.15351	0.00110891
1991.04	147.231	0.571385	146.975	1.01895	1.15294	0.000571386	1.15268	0.00101895
1991.12	146.794	0.566069	146.598	1.04667	1.15251	0.000566069	1.15232	0.00104667
1991.21	146.33	0.577599	146.621	1.04363	1.15206	0.000577599	1.15235	0.00104363
1991.29	145.831	0.60213	146.378	1.03152	1.15157	0.00060213	1.15212	0.00103152
1991.38	145.294	0.63301	145.259	1.14783	1.15104	0.00063301	1.151	0.00114783
1991.46	144.714	0.664005	143.346	1.3817	1.15047	0.000664005	1.14909	0.0013817
1991.54	144.089	0.690188	141.396	1.52488	1.14985	0.000690188	1.14715	0.00152488
1991.62	143.421	0.708574	140.19	1.40237	1.14919	0.000708574	1.14594	0.00140237
1991.71	142.712	0.719417	139.91	1.1001	1.14849	0.000719417	1.14568	0.0011001
1991.79	141.965	0.725753	140.14	0.994868	1.14775	0.000725753	1.14592	0.000994868
1991.88	141.189	0.734761	140.35	1.13685	1.14698	0.000734761	1.14614	0.00113685
1991.96	140.39	0.756339	140.319	1.21279	1.14619	0.000756339	1.14612	0.00121279
1992.04	139.577	0.801655	140.122	1.30071	1.14539	0.000801655	1.14594	0.00130071
1992.12	138.762	0.878466	139.825	1.52418	1.14458	0.000878466	1.14565	0.00152418
1992.21	137.951	0.988145	139.291	1.65515	1.14378	0.000988145	1.14512	0.00165515
1992.29	137.155	1.12577	138.32	1.58845	1.14299	0.00112577	1.14416	0.00158845
1992.38	136.381	1.28166	136.951	1.55341	1.14222	0.00128166	1.14279	0.00155341
1992.46	135.635	1.44491	135.565	1.6781	1.14148	0.00144491	1.14141	0.00167811
1992.54	134.92	1.60451	134.662	1.76673	1.14078	0.00160451	1.14052	0.00176673
1992.62	134.241	1.74961	134.469	1.71048	1.1401	0.00174961	1.14033	0.00171048
1992.71	133.597	1.87148	134.711	1.61149	1.13947	0.00187148	1.14059	0.00161149
1992.79	132.987	1.96307	134.816	1.62535	1.13887	0.00196307	1.1407	0.00162535
1992.88	132.41	2.01961	134.417	1.82457	1.1383	0.00201961	1.14032	0.00182457
1992.96	131.863	2.03935	133.717	2.21487	1.13776	0.00203935	1.13962	0.00221487
1993.04	131.343	2.02394	133.273	2.65239	1.13725	0.00202394	1.13919	0.00265239
1993.12	130.851	1.978	133.346	2.84329	1.13677	0.001978	1.13927	0.00284329
1993.21	130.386	1.90981	133.495	2.66781	1.13631	0.00190981	1.13943	0.00266781
1993.29	129.947	1.82998	132.978	2.35461	1.13588	0.00182998	1.13893	0.00235461
1993.38	129.54	1.75084	131.654	2.15701	1.13548	0.00175084	1.13761	0.00215701
1993.46	129.166	1.68417	130.332	1.99828	1.13512	0.00168417	1.13629	0.00199828
1993.54	128.83	1.63858	130.006	1.82238	1.13479	0.00163858	1.13597	0.00182238
1993.62	128.535	1.61756	130.68	1.8732	1.13451	0.00161756	1.13666	0.0018732
1993.71	128.284	1.61798	131.142	2.27409	1.13426	0.00161798	1.13714	0.00227409
1993.79	128.076	1.63223	130.1	2.74577	1.13407	0.00163223	1.1361	0.00274577
1993.88	127.909	1.65065	127.579	3.06845	1.13391	0.00165065	1.13358	0.00306844
1993.96	127.777	1.66456	125.086	3.20928	1.13379	0.00166456	1.13108	0.00320928
1994.04	127.669	1.66786	124.348	3.14276	1.13369	0.00166786	1.13035	0.00314276
1994.12	127.57	1.65755	125.844	2.94439	1.1336	0.00165755	1.13187	0.00294439
1994.21	127.462	1.63383	128.43	2.7588	1.13351	0.00163383	1.13448	0.0027588
1994.29	127.325	1.59895	130.26	2.50454	1.13338	0.00159895	1.13633	0.00250454
1994.38	127.137	1.55644	130.094	2.28335	1.1332	0.00155644	1.13618	0.00228335
1994.46	126.876	1.51005	128.068	2.39196	1.13295	0.00151005	1.13415	0.00239196
1994.54	126.521	1.46268	125.505	2.52354	1.13261	0.00146268	1.13159	0.00252354
1994.62	126.059	1.41606	124.013	2.70229	1.13215	0.00141606	1.1301	0.00270229
1994.71	125.477	1.37056	124.376	3.25608	1.13158	0.00137056	1.13047	0.00325608
1994.79	124.771	1.32545	126.019	3.56315	1.13088	0.00132545	1.13214	0.00356315
1994.88	123.948	1.27995	127.41	3.1088	1.13007	0.00127995	1.13355	0.0031088
1994.96	123.018	1.23336	127.189	2.2949	1.12914	0.00123336	1.13334	0.0022949
1995.04	122	1.18595	125.034	1.91459	1.12813	0.00118595	1.13118	0.00191459
1995.12	120.922	1.13882	121.674	1.98335	1.12706	0.00113882	1.12781	0.00198335
1995.21	119.815	1.09391	118.181	2.04194	1.12596	0.00109391	1.12431	0.00204194
1995.29	118.712	1.05262	115.378	1.95957	1.12486	0.00105262	1.12151	0.00195957
1995.38	117.652	1.01651	113.749	1.77129	1.1238	0.00101651	1.11988	0.00177129
1995.46	116.668	0.986062	113.47	1.58026	1.12282	0.000986062	1.11961	0.00158026
1995.54	115.787	0.961006	114.295	1.4752	1.12195	0.000961006	1.12045	0.0014752
1995.62	115.036	0.940609	115.44	1.52521	1.12121	0.000940609	1.12161	0.00152521
1995.71	114.429	0.924261	115.952	1.76997	1.12061	0.000924261	1.12214	0.00176997
1995.79	113.972	0.911992	115.353	1.99522	1.12016	0.000911992	1.12155	0.00199522
1995.88	113.664	0.904851	113.912	1.91571	1.11986	0.00090485	1.12011	0.00191571
1995.96	113.492	0.904057	112.225	1.5609	1.1197	0.000904057	1.11843	0.0015609
1996.04	113.436	0.911085	110.726	1.32843	1.11965	0.000911085	1.11693	0.00132843
1996.12	113.47	0.926225	109.747	1.51401	1.1197	0.000926225	1.11596	0.00151401
1996.21	113.562	0.948364	109.851	1.77101	1.1198	0.000948364	1.11607	0.00177101
1996.29	113.681	0.975068	111.645	1.83603	1.11993	0.000975068	1.11789	0.00183603
1996.38	113.792	1.00258	114.971	1.96398	1.12006	0.00100258	1.12124	0.00196398
1996.46	113.868	1.0271	118.485	2.32002	1.12014	0.0010271	1.12479	0.00232002
1996.54	113.882	1.04531	120.43	2.56683	1.12017	0.00104531	1.12676	0.00256683
1996.62	113.817	1.05539	120.035	2.46043	1.12012	0.00105539	1.12637	0.00246043
1996.71	113.661	1.05715	118.082	1.98421	1.11997	0.00105715	1.12442	0.00198421
1996.79	113.412	1.05276	115.95	1.50963	1.11973	0.00105276	1.12228	0.00150963
1996.88	113.072	1.04654	114.244	1.69628	1.1194	0.00104654	1.12058	0.00169628
1996.96	112.654	1.04472	112.466	1.94734	1.11899	0.00104472	1.1188	0.00194734
1997.04	112.17	1.05443	110.062	1.75272	1.11852	0.00105443	1.1164	0.00175272
1997.12	111.643	1.08177	107.52	1.60115	1.118	0.00108177	1.11385	0.00160115
1997.21	111.091	1.13016	106.18	1.92142	1.11745	0.00113016	1.11251	0.00192143
1997.29	110.535	1.19915	106.987	2.30949	1.11691	0.00119915	1.11334	0.00230949
1997.38	109.993	1.28434	109.504	2.43175	1.11637	0.00128434	1.11588	0.00243175
1997.46	109.482	1.37919	112.254	2.24379	1.11587	0.00137919	1.11866	0.00224379
1997.54	109.01	1.47636	113.937	2.04381	1.11541	0.00147636	1.12036	0.00204381
1997.62	108.586	1.56877	114.277	2.08817	1.11499	0.00156877	1.12071	0.00208817
1997.71	108.21	1.65048	113.815	2.14142	1.11462	0.00165048	1.12026	0.00214142
1997.79	107.878	1.71713	113.118	2.05685	1.1143	0.00171713	1.11957	0.00205685
1997.88	107.585	1.76578	112.342	1.93729	1.11402	0.00176578	1.1188	0.00193729
1997.96	107.319	1.79547	111.426	1.84147	1.11376	0.00179547	1.11789	0.00184147
1998.04	107.069	1.80693	110.469	1.7809	1.11352	0.00180693	1.11694	0.0017809
1998.12	106.821	1.80244	109.76	1.76615	1.11328	0.00180244	1.11624	0.00176615
1998.21	106.564	1.78566	109.479	1.7698	1.11304	0.00178566	1.11597	0.0017698
1998.29	106.283	1.76113	109.478	1.76738	1.11276	0.00176113	1.11598	0.00176738
1998.38	105.968	1.73348	109.417	1.7506	1.11246	0.00173348	1.11593	0.0017506
1998.46	105.609	1.70702	109.079	1.72871	1.11211	0.00170702	1.1156	0.00172871
1998.54	105.198	1.6843	108.553	1.72815	1.11171	0.0016843	1.11508	0.00172815
1998.62	104.73	1.66654	108.11	1.75172	1.11125	0.00166654	1.11465	0.00175172
1998.71	104.198	1.65257	107.884	1.78469	1.11072	0.00165257	1.11443	0.00178469
1998.79	103.599	1.63945	107.653	1.81662	1.11013	0.00163945	1.11421	0.00181662
1998.88	102.931	1.62329	106.978	1.82013	1.10947	0.00162329	1.11354	0.00182013
1998.96	102.191	1.59987	105.701	1.79687	1.10874	0.00159987	1.11227	0.00179687
1999.04	101.379	1.56533	104.352	1.82523	1.10793	0.00156533	1.11092	0.00182523
1999.12	100.497	1.51742	103.885	1.96991	1.10706	0.00151742	1.11046	0.00196991
1999.21	99.5464	1.4546	104.632	2.19344	1.10611	0.0014546	1.11123	0.00219344
1999.29	98.5318	1.37732	105.456	2.33702	1.1051	0.00137732	1.11207	0.00233702
1999.38	97.4631	1.2875	104.272	2.18326	1.10404	0.0012875	1.11089	0.00218326
1999.46	96.3504	1.18873	99.9426	1.73381	1.10293	0.00118873	1.10654	0.00173381
1999.54	95.207	1.08551	93.8222	1.44356	1.10179	0.00108551	1.1004	0.00144356
1999.62	94.0541	0.984353	89.1419	1.57687	1.10064	0.000984353	1.0957	0.00157687
1999.71	92.9117	0.892182	88.3426	1.662	1.0995	0.000892182	1.09491	0.001662
1999.79	91.8029	0.816397	90.9534	1.55183	1.0984	0.000816397	1.09754	0.00155183
1999.88	90.7566	0.763795	94.0451	1.39985	1.09736	0.000763795	1.10067	0.00139985
1999.96	89.7979	0.737399	94.8657	1.24347	1.0964	0.000737399	1.1015	0.00124347
2000.04	88.9515	0.735874	92.9087	1.18161	1.09556	0.000735874	1.09954	0.00118161
2000.12	88.2422	0.753207	89.607	1.298	1.09486	0.000753207	1.09623	0.001298
2000.21	87.6874	0.781531	86.4303	1.31616	1.09431	0.000781531	1.09305	0.00131616
2000.29	87.2994	0.813241	83.7572	1.17461	1.09393	0.000813241	1.09037	0.00117461
2000.38	87.0843	0.842997	81.5167	1.30079	1.09373	0.000842997	1.08813	0.00130079
2000.46	87.0391	0.867833	80.2945	1.71656	1.09369	0.000867833	1.08691	0.00171656
2000.54	87.1528	0.886998	81.2355	2.02413	1.09382	0.000886998	1.08787	0.00202413
2000.62	87.4061	0.90177	84.664	2.04261	1.09409	0.00090177	1.09133	0.00204261
2000.71	87.7725	0.914953	89.1524	1.81448	1.09447	0.000914953	1.09585	0.00181448
2000.79	88.2197	0.929775	92.3206	1.62582	1.09493	0.000929775	1.09905	0.00162582
2000.88	88.7099	0.94916	92.717	1.62599	1.09543	0.00094916	1.09946	0.00162599
2000.96	89.2046	0.974567	90.9669	1.60992	1.09594	0.000974567	1.09771	0.00160992
2001.04	89.6659	1.00532	89.0551	1.57955	1.09641	0.00100532	1.0958	0.00157955
2001.12	90.0566	1.03886	88.6283	1.67996	1.09682	0.00103886	1.09538	0.00167996
2001.21	90.3464	1.07092	89.9022	1.93531	1.09712	0.00107092	1.09667	0.00193531
2001.29	90.5114	1.09666	91.968	2.21789	1.0973	0.00109666	1.09876	0.00221789
2001.38	90.5355	1.11116	93.723	2.28874	1.09733	0.00111116	1.10054	0.00228874
2001.46	90.4122	1.11096	94.4104	2.13969	1.09722	0.00111096	1.10124	0.00213969
2001.54	90.1438	1.09324	93.5269	1.99131	1.09696	0.00109324	1.10037	0.00199131
2001.62	89.7425	1.05719	90.8158	1.8258	1.09657	0.00105719	1.09765	0.0018258
2001.71	89.2274	1.00336	86.7035	1.51476	1.09606	0.00100336	1.09352	0.00151476
2001.79	88.6232	0.934096	82.6561	1.2466	1.09546	0.000934096	1.08946	0.0012466
2001.88	87.9609	0.853418	80.6651	1.16981	1.09481	0.000853418	1.08747	0.00116981
2001.96	87.2713	0.766823	81.86	1.07624	1.09413	0.000766823	1.08868	0.00107624
2002.04	86.5842	0.681216	85.4871	0.937402	1.09345	0.000681216	1.09234	0.000937402
2002.12	85.9296	0.605053	89.223	0.865218	1.0928	0.000605053	1.09611	0.000865218
2002.21	85.3297	0.547425	90.7932	0.80954	1.09221	0.000547425	1.0977	0.00080954
2002.29	84.8011	0.514953	89.4964	0.770592	1.09168	0.000514953	1.09641	0.000770592
2002.38	84.3549	0.509381	86.4883	0.794773	1.09125	0.000509381	1.09339	0.000794773
2002.46	83.9924	0.525498	83.6864	0.802072	1.09089	0.000525498	1.09058	0.000802072
2002.54	83.7079	0.554125	82.3513	0.770759	1.09062	0.000554125	1.08925	0.000770759
2002.62	83.49	0.585956	82.4464	0.805577	1.09041	0.000585956	1.08936	0.000805577
2002.71	83.3207	0.614268	83.0391	0.94309	1.09025	0.000614268	1.08997	0.00094309
2002.79	83.1787	0.634786	83.2049	1.08817	1.09012	0.000634786	1.09014	0.00108817
2002.88	83.0408	0.645196	82.6539	1.13766	1.08999	0.000645196	1.0896	0.00113766
2002.96	82.8839	0.645102	81.7766	1.07453	1.08984	0.000645102	1.08873	0.00107453
2003.04	82.6865	0.635137	81.2671	1.03091	1.08966	0.000635137	1.08823	0.00103091
2003.12	82.4316	0.616809	81.6558	1.11049	1.08941	0.000616809	1.08863	0.00111049
2003.21	82.1063	0.592493	82.9542	1.18614	1.08909	0.000592493	1.08995	0.00118614
2003.29	81.7033	0.564785	84.5683	1.15829	1.0887	0.000564785	1.09158	0.00115829
2003.38	81.2231	0.536376	85.5502	1.05961	1.08823	0.000536376	1.09258	0.00105961
2003.46	80.6706	0.509523	85.1693	0.93613	1.08768	0.000509523	1.09221	0.00093613
2003.54	80.056	0.485746	83.4098	0.850044	1.08707	0.000485746	1.09045	0.000850044
2003.62	79.3957	0.466385	80.9975	0.857801	1.08642	0.000466385	1.08803	0.000857801
2003.71	78.7073	0.451565	78.8221	0.899641	1.08574	0.000451565	1.08585	0.000899641
2003.79	78.009	0.441383	77.2875	0.92854	1.08505	0.000441383	1.08432	0.00092854
2003.88	77.3219	0.435895	76.1859	0.955141	1.08437	0.000435895	1.08322	0.000955141
2003.96	76.6621	0.435417	75.1486	0.979367	1.08371	0.000435417	1.08219	0.000979367
2004.04	76.0427	0.44057	74.1219	1.01816	1.0831	0.00044057	1.08117	0.00101816
2004.12	75.4749	0.451774	73.324	1.06141	1.08254	0.000451774	1.08037	0.00106141
2004.21	74.9627	0.468679	72.8668	1.0529	1.08203	0.000468679	1.07992	0.0010529
2004.29	74.5046	0.490274	72.6693	0.970755	1.08158	0.000490274	1.07974	0.000970755
2004.38	74.0961	0.514576	72.7754	0.850148	1.08118	0.000514576	1.07985	0.000850148
2004.46	73.7263	0.53898	73.5098	0.907315	1.08082	0.00053898	1.0806	0.000907315
2004.54	73.3813	0.560832	75.0291	1.31662	1.08049	0.000560832	1.08215	0.00131662
2004.62	73.0454	0.577556	76.697	1.73368	1.08016	0.000577556	1.08383	0.00173368
2004.71	72.7011	0.587391	77.2152	1.81413	1.07982	0.000587391	1.08437	0.00181413
2004.79	72.3312	0.588982	75.6476	1.49169	1.07946	0.000588982	1.0828	0.00149169
2004.88	71.921	0.582074	72.4454	1.00363	1.07906	0.000582074	1.07959	0.00100363
2004.96	71.4578	0.567109	69.3239	0.782951	1.0786	0.000567109	1.07646	0.000782951
2005.04	70.9319	0.545361	67.9793	0.866349	1.07809	0.000545361	1.07511	0.000866349
2005.12	70.3397	0.518822	68.7272	0.896552	1.0775	0.000518822	1.07588	0.000896552
2005.21	69.6805	0.48991	70.3714	0.851782	1.07685	0.00048991	1.07754	0.000851782
2005.29	68.9572	0.461741	71.1299	0.765658	1.07613	0.000461741	1.07832	0.000765658
2005.38	68.1796	0.437111	70.1288	0.736673	1.07536	0.000437111	1.07732	0.000736673
2005.46	67.3581	0.418579	67.9776	0.734617	1.07454	0.000418579	1.07517	0.000734617
2005.54	66.505	0.407585	66.018	0.737624	1.07369	0.000407585	1.0732	0.000737624
2005.62	65.6381	0.404287	65.0782	0.759195	1.07283	0.000404287	1.07227	0.000759195
2005.71	64.7718	0.407359	64.8608	0.844543	1.07197	0.000407359	1.07206	0.000844543
2005.79	63.9208	0.414838	64.4564	0.956655	1.07113	0.000414838	1.07166	0.000956655
2005.88	63.1013	0.424567	63.3222	1.02511	1.07031	0.000424567	1.07053	0.00102511
2005.96	62.3252	0.434707	61.7621	0.997521	1.06954	0.000434707	1.06897	0.000997521
2006.04	61.6018	0.444487	60.5305	0.952665	1.06882	0.000444487	1.06774	0.000952665
2006.12	60.941	0.453717	60.048	1.02691	1.06817	0.000453717	1.06727	0.00102691
2006.21	60.3468	0.463498	59.9969	1.09536	1.06758	0.000463498	1.06723	0.00109536
2006.29	59.8214	0.475214	59.6891	1.05221	1.06706	0.000475214	1.06693	0.00105221
2006.38	59.366	0.490516	58.8208	1.02145	1.06661	0.000490516	1.06607	0.00102145
2006.46	58.978	0.510456	57.8717	1.00312	1.06623	0.000510456	1.06512	0.00100312
2006.54	58.6529	0.535276	57.7055	0.99701	1.06592	0.000535276	1.06496	0.00099701
2006.62	58.3858	0.563909	58.6764	0.938657	1.06566	0.000563909	1.06595	0.000938657
2006.71	58.1692	0.594419	60.1038	0.852606	1.06545	0.000594419	1.0674	0.000852606
2006.79	57.9951	0.624312	60.7312	0.855147	1.06529	0.000624312	1.06804	0.000855147
2006.88	57.8549	0.650751	59.8351	1.0153	1.06516	0.000650751	1.06715	0.0010153
2006.96	57.7392	0.671269	57.9558	1.26589	1.06505	0.000671269	1.06527	0.00126589
2007.04	57.6386	0.683926	56.4699	1.42684	1.06496	0.000683926	1.06378	0.00142684
2007.12	57.5438	0.687454	56.3033	1.41524	1.06488	0.000687454	1.06363	0.00141524
2007.21	57.4458	0.681606	57.1852	1.40361	1.06479	0.000681606	1.06453	0.00140361
2007.29	57.3359	0.666596	58.0287	1.42852	1.06469	0.000666596	1.06539	0.00142852
2007.38	57.2071	0.643672	58.0027	1.3048	1.06457	0.000643672	1.06537	0.0013048
2007.46	57.0528	0.614724	57.2611	1.01273	1.06443	0.000614724	1.06463	0.00101273
2007.54	56.8681	0.581715	56.6448	0.783411	1.06425	0.000581715	1.06403	0.000783411
2007.62	56.6501	0.547315	56.7667	0.793574	1.06404	0.000547315	1.06416	0.000793574
2007.71	56.3971	0.513876	57.4148	0.888045	1.0638	0.000513876	1.06482	0.000888045
2007.79	56.1091	0.483905	57.8372	0.905254	1.06352	0.000483905	1.06526	0.000905254
2007.88	55.789	0.459405	57.5029	0.861951	1.06321	0.000459405	1.06493	0.000861951
2007.96	55.4398	0.442316	56.5329	0.850632	1.06287	0.000442316	1.06397	0.000850632
2008.04	55.0663	0.433588	55.4222	0.844886	1.0625	0.000433588	1.06286	0.000844886
2008.12	54.6749	0.433412	54.4917	0.799551	1.06212	0.000433412	1.06193	0.000799551
2008.21	54.272	0.441146	53.6888	0.787752	1.06172	0.000441146	1.06113	0.000787752
2008.29	53.8634	0.455149	52.8916	0.842781	1.06132	0.000455149	1.06034	0.000842781
2008.38	53.4563	0.47307	52.2335	0.87768	1.06092	0.00047307	1.05969	0.00087768
2008.46	53.0561	0.492255	52.0042	0.82142	1.06053	0.000492255	1.05947	0.00082142
2008.54	52.6669	0.510323	52.2654	0.711498	1.06015	0.000510323	1.05974	0.000711498
2008.62	52.2933	0.524536	52.6528	0.695786	1.05978	0.000524536	1.06014	0.000695786
2008.71	51.9378	0.533085	52.6401	0.812721	1.05943	0.000533085	1.06014	0.000812721
2008.79	51.6016	0.534975	52.003	0.973107	1.05911	0.000534975	1.05951	0.000973107
2008.88	51.2865	0.529721	51.0382	1.11612	1.0588	0.000529721	1.05855	0.00111612
2008.96	50.9928	0.517858	50.3379	1.14388	1.05852	0.000517858	1.05786	0.00114388
2009.04	50.7205	0.500968	50.3392	0.992046	1.05825	0.000500968	1.05787	0.000992046
2009.12	50.4706	0.481349	50.9773	0.761755	1.05801	0.000481349	1.05852	0.000761755
2009.21	50.2435	0.462196	51.6778	0.645213	1.05779	0.000462196	1.05924	0.000645213
2009.29	50.0397	0.446883	51.7243	0.653651	1.0576	0.000446883	1.05929	0.000653651
2009.38	49.861	0.439034	50.8136	0.676387	1.05743	0.000439034	1.05839	0.000676387
2009.46	49.7082	0.44055	49.4053	0.694768	1.05729	0.00044055	1.05698	0.000694768
2009.54	49.582	0.452285	48.477	0.757914	1.05717	0.000452285	1.05606	0.000757914
2009.62	49.483	0.472869	48.7381	0.879117	1.05708	0.000472869	1.05633	0.000879117
2009.71	49.4102	0.49997	49.9142	0.928849	1.05702	0.00049997	1.05752	0.000928849
2009.79	49.3608	0.530871	50.8618	0.778775	1.05698	0.000530871	1.05849	0.000778775
2009.88	49.3305	0.562625	50.5239	0.629376	1.05696	0.000562625	1.05816	0.000629376
2009.96	49.3126	0.59283	48.9099	0.940273	1.05695	0.00059283	1.05655	0.000940273
2010.04	49.2985	0.619488	47.1135	1.32115	1.05695	0.000619488	1.05475	0.00132115
2010.12	49.2772	0.641118	46.3488	1.42537	1.05694	0.000641118	1.05399	0.00142537
2010.21	49.2362	0.656627	46.8971	1.26946	1.05691	0.000656627	1.05455	0.00126946
2010.29	49.1621	0.665353	47.9978	1.02503	1.05684	0.000665353	1.05567	0.00102503
2010.38	49.0413	0.667316	48.6718	0.980838	1.05673	0.000667316	1.05636	0.000980838
2010.46	48.8606	0.662875	48.6355	1.25015	1.05656	0.000662875	1.05633	0.00125015
2010.54	48.6084	0.653146	48.4145	1.42529	1.05632	0.000653146	1.05612	0.00142529
2010.62	48.276	0.63976	48.6654	1.26326	1.05599	0.00063976	1.05638	0.00126326
2010.71	47.8575	0.624488	49.4332	0.929529	1.05558	0.000624488	1.05717	0.000929529
2010.79	47.35	0.609528	50.0604	0.745864	1.05508	0.000609528	1.05781	0.000745864
2010.88	46.757	0.596673	49.77	0.739589	1.05449	0.000596673	1.05753	0.000739589
2010.96	46.0839	0.587413	48.3392	0.771691	1.05383	0.000587413	1.0561	0.000771691
2011.04	45.3402	0.582334	46.232	0.797844	1.05309	0.000582334	1.05399	0.000797844
2011.12	44.5411	0.581419	44.1532	0.83811	1.05229	0.000581419	1.0519	0.00083811
2011.21	43.7018	0.583709	42.4727	0.901035	1.05146	0.000583709	1.05022	0.000901035
2011.29	42.8394	0.588547	41.1091	0.937195	1.0506	0.000588547	1.04886	0.000937195
2011.38	41.9747	0.594533	39.887	1.02071	1.04974	0.000594533	1.04764	0.00102071
2011.46	41.1249	0.601058	38.8972	1.20738	1.04889	0.000601058	1.04665	0.00120737
2011.54	40.3066	0.607442	38.4377	1.33895	1.04808	0.000607442	1.0462	0.00133895
2011.62	39.5363	0.613191	38.5935	1.32128	1.04731	0.000613191	1.04636	0.00132128
2011.71	38.8258	0.617936	38.9839	1.24547	1.04661	0.000617936	1.04677	0.00124547
2011.79	38.1829	0.621168	39.0364	1.22829	1.04597	0.000621168	1.04683	0.00122829
2011.88	37.6147	0.622047	38.5248	1.2762	1.04541	0.000622047	1.04633	0.0012762
2011.96	37.1223	0.619851	37.7801	1.33063	1.04492	0.000619851	1.04559	0.00133063
2012.04	36.7033	0.613593	37.3135	1.3398	1.04451	0.000613593	1.04513	0.0013398
2012.12	36.3538	0.602678	37.2539	1.31333	1.04417	0.000602678	1.04508	0.00131333
2012.21	36.0657	0.586996	37.2128	1.29426	1.04389	0.000586996	1.04505	0.00129426
2012.29	35.8287	0.566723	36.7345	1.22302	1.04366	0.000566723	1.04458	0.00122302
2012.38	35.6315	0.543048	35.8251	1.03213	1.04347	0.000543048	1.04367	0.00103213
2012.46	35.4611	0.517456	34.9676	0.933108	1.04331	0.000517456	1.04282	0.000933108
2012.54	35.3041	0.492039	34.611	1.08531	1.04317	0.000492039	1.04247	0.00108531
2012.62	35.1473	0.468998	34.6996	1.15045	1.04302	0.000468998	1.04257	0.00115045
2012.71	34.9778	0.450115	34.7616	1.02481	1.04286	0.000450115	1.04264	0.00102481
2012.79	34.7839	0.436369	34.4547	0.975407	1.04267	0.000436369	1.04234	0.000975407
2012.88	34.556	0.427923	33.9492	1.03835	1.04245	0.000427923	1.04184	0.00103835
2012.96	34.286	0.423845	33.7241	1.00323	1.04219	0.000423845	1.04163	0.00100323
2013.04	33.968	0.422883	34.0183	0.873516	1.04188	0.000422883	1.04193	0.000873516
2013.12	33.5999	0.423913	34.5244	0.749924	1.04152	0.000423913	1.04245	0.000749924
2013.21	33.1817	0.426247	34.6356	0.730002	1.04111	0.000426247	1.04258	0.000730002
2013.29	32.7157	0.430015	33.9673	0.833112	1.04065	0.000430015	1.04191	0.000833112
2013.38	32.2093	0.436068	32.6759	0.908392	1.04015	0.000436068	1.04062	0.000908392
2013.46	31.6702	0.445177	31.3276	0.934579	1.03962	0.000445177	1.03927	0.000934579
2013.54	31.1082	0.457932	30.4721	1.00367	1.03906	0.000457932	1.03842	0.00100367
2013.62	30.537	0.474227	30.2293	1.02093	1.0385	0.000474227	1.03819	0.00102093
2013.71	29.9679	0.493172	30.1779	0.891857	1.03794	0.000493172	1.03815	0.000891857
2013.79	29.4127	0.513129	29.7037	0.775586	1.03739	0.000513129	1.03768	0.000775586
2013.88	28.8835	0.532019	28.5909	0.878983	1.03686	0.000532019	1.03657	0.000878983
2013.96	28.3881	0.548208	27.319	1.12972	1.03638	0.000548208	1.0353	0.00112972
2014.04	27.9317	0.560149	26.6637	1.31139	1.03593	0.000560149	1.03465	0.00131139
2014.12	27.5171	0.567217	26.8769	1.22454	1.03552	0.000567217	1.03487	0.00122454
2014.21	27.1417	0.569635	27.296	0.936308	1.03515	0.000569635	1.03531	0.000936308
2014.29	26.7989	0.568536	26.9349	0.889468	1.03482	0.000568536	1.03495	0.000889468
2014.38	26.4796	0.566097	25.5334	1.07821	1.0345	0.000566097	1.03355	0.00107821
2014.46	26.1702	0.565262	23.9462	1.12446	1.0342	0.000565262	1.03196	0.00112446
2014.54	25.8555	0.56921	23.3814	1.05807	1.0339	0.00056921	1.0314	0.00105807
2014.62	25.5202	0.580801	24.2211	1.01194	1.03357	0.000580801	1.03226	0.00101194
2014.71	25.1481	0.602011	25.6201	0.949257	1.0332	0.000602011	1.03368	0.000949257
2014.79	24.725	0.63323	26.292	0.852673	1.03279	0.00063323	1.03437	0.000852673
2014.88	24.2413	0.673563	25.665	0.853425	1.03231	0.000673563	1.03375	0.000853425
2014.96	23.6897	0.721049	24.307	0.985961	1.03177	0.000721049	1.03239	0.000985961

## Sheet: WLGCGO_MONTHLY_SMOOTH_CURVE
Number of header lines 13
Output from bhd_smoothcurve.pro 20161129
WLGCGO_MONTHLY_SMOOTH_CURVE
ccgvu (Thoning et al., 1989) used to fit a combined WLG/CGO record in which WLG FINAL SCREENED DATA is used for all periods except 1995-2005 which has been replaced with CGO data (Levin et al., 2010)
curve fits have been interpolated from the raw measurements to provide monthly resolution
D14C = DELTA14C, decay corrected to the date of collection, normalised to delta13C of -25 permil
F14C = fraction modern, normalised to delta13C of -25 permil without decay correction
trend is the deseasonalised trend derived using the full Wellington 14CO2 dataset
fit is the curve fitted to the Wellington 14CO2 data, performed in five separate increments (1954-1965, 1966-1979,1980-1989,1990-2004,2005-2015) to allow the seasonal cycle to vary through time
the sections have been spliced together by interpolating across two year periods
errors for trend and fit were determined from a Monte Carlo simulation of the curve fits using the assigned measurement uncertainties for each data point
this dataset is a combination of the Wellington 14CO2 record and the Cape Grim 14CO2 record with Wellington 1995-2005 removed
Date	D14C_trend	D14C_trend_err	D14C_fit	D14C_fit_err	F14C_trend	F14C_trend_err	F14C_fit	F14C_fit_err
1954.96	-11.719	3.64917	-17.8684	6.41859	0.988874	0.00364917	0.982721	0.00641859
1955.04	-11.6845	3.46048	-8.62811	5.41377	0.988918	0.00346048	0.991977	0.00541377
1955.12	-11.4657	3.25032	-6.04696	4.87775	0.989147	0.00325032	0.994569	0.00487775
1955.21	-11.0249	3.02732	-8.07034	4.54398	0.989598	0.00302732	0.992555	0.00454398
1955.29	-10.33	2.80208	-9.18701	4.27447	0.990304	0.00280208	0.991447	0.00427447
1955.38	-9.3619	2.58705	-6.35853	4.23153	0.991282	0.00258705	0.994288	0.00423153
1955.46	-8.1114	2.39399	-2.09783	4.28722	0.992544	0.00239399	0.998561	0.00428722
1955.54	-6.58223	2.23352	-1.56842	4.1838	0.994084	0.00223352	0.999101	0.0041838
1955.62	-4.79804	2.11356	-6.70875	3.83672	0.995879	0.00211356	0.993967	0.00383672
1955.71	-2.79084	2.03601	-13.4818	3.44917	0.997898	0.00203601	0.9872	0.00344917
1955.79	-0.60355	1.99727	-15.3573	3.55262	1.0001	0.00199727	0.985333	0.00355262
1955.88	1.7036	1.98896	-9.66762	4.0686	1.00242	0.00198896	0.991036	0.0040686
1955.96	4.07289	2.00005	-0.30889	4.16027	1.0048	0.00200005	1.00041	0.00416027
1956.04	6.44551	2.01932	6.27376	3.56774	1.00718	0.00201932	1.00701	0.00356774
1956.12	8.75777	2.03736	7.70614	2.93649	1.00951	0.00203736	1.00845	0.00293649
1956.21	10.9621	2.04697	8.03255	2.89678	1.01172	0.00204697	1.00879	0.00289678
1956.29	13.022	2.04338	13.045	3.26759	1.01379	0.00204338	1.01382	0.00326759
1956.38	14.9085	2.0238	23.502	3.71496	1.01569	0.0020238	1.02429	0.00371496
1956.46	16.6166	1.98738	33.4745	3.94243	1.01741	0.00198738	1.03428	0.00394243
1956.54	18.1576	1.9348	35.6465	3.8585	1.01896	0.0019348	1.03647	0.0038585
1956.62	19.554	1.86848	28.3261	3.59249	1.02037	0.00186848	1.02915	0.00359249
1956.71	20.8483	1.79228	17.2662	3.13518	1.02168	0.00179228	1.01809	0.00313518
1956.79	22.0939	1.71125	10.7096	2.64845	1.02293	0.00171125	1.01154	0.00264845
1956.88	23.3469	1.63229	12.6619	2.67504	1.0242	0.00163229	1.0135	0.00267504
1956.96	24.6707	1.56284	20.2811	2.93905	1.02553	0.00156284	1.02114	0.00293905
1957.04	26.1271	1.51	27.2179	2.93861	1.027	0.00151	1.02809	0.00293861
1957.12	27.7667	1.47965	29.2259	2.98669	1.02865	0.00147965	1.03011	0.00298669
1957.21	29.6353	1.47434	27.3461	3.16039	1.03053	0.00147434	1.02824	0.00316039
1957.29	31.7672	1.49301	26.2129	3.04861	1.03268	0.00149301	1.02712	0.00304861
1957.38	34.1751	1.53079	29.4632	2.79865	1.0351	0.00153079	1.03038	0.00279865
1957.46	36.8643	1.5809	36.3623	2.72125	1.0378	0.0015809	1.0373	0.00272125
1957.54	39.8288	1.63614	42.7911	2.70789	1.04078	0.00163614	1.04374	0.00270789
1957.62	43.0401	1.68983	45.612	2.83415	1.044	0.00168983	1.04658	0.00283415
1957.71	46.4716	1.73771	46.1429	2.97972	1.04745	0.00173771	1.04712	0.00297972
1957.79	50.0931	1.77663	48.8376	2.80825	1.05108	0.00177663	1.04983	0.00280825
1957.88	53.86	1.80523	56.3868	2.77863	1.05486	0.00180523	1.05739	0.00277863
1957.96	57.7426	1.82365	66.4227	3.31853	1.05876	0.00182365	1.06745	0.00331853
1958.04	61.7175	1.83242	73.5514	3.63359	1.06275	0.00183242	1.0746	0.00363359
1958.12	65.7545	1.83231	74.6738	3.31456	1.0668	0.00183231	1.07573	0.00331456
1958.21	69.8466	1.82365	71.9943	2.96889	1.07091	0.00182365	1.07306	0.00296889
1958.29	73.9972	1.8067	70.4901	3.12348	1.07508	0.0018067	1.07156	0.00312348
1958.38	78.2033	1.78113	72.9509	3.31575	1.0793	0.00178113	1.07404	0.00331575
1958.46	82.4843	1.74668	77.8908	3.25189	1.08359	0.00174668	1.07899	0.00325189
1958.54	86.8651	1.70396	82.1982	3.0254	1.08799	0.00170396	1.08332	0.0030254
1958.62	91.3573	1.6551	85.056	2.70231	1.0925	0.0016551	1.08619	0.00270231
1958.71	95.9872	1.60366	88.834	2.54858	1.09714	0.00160366	1.08998	0.00254858
1958.79	100.778	1.55504	96.2207	2.76855	1.10195	0.00155504	1.09739	0.00276854
1958.88	105.728	1.51631	106.945	2.90376	1.10692	0.00151631	1.10813	0.00290376
1958.96	110.845	1.49341	117.589	2.78257	1.11205	0.00149341	1.1188	0.00278257
1959.04	116.127	1.4903	124.452	2.8949	1.11735	0.0014903	1.12568	0.0028949
1959.12	121.54	1.50697	126.714	3.25753	1.12278	0.00150697	1.12796	0.00325753
1959.21	127.06	1.53968	127.057	3.39381	1.12832	0.00153968	1.12831	0.00339381
1959.29	132.651	1.58189	129.197	3.28513	1.13392	0.00158189	1.13047	0.00328513
1959.38	138.25	1.62665	134.674	3.11456	1.13954	0.00162665	1.13596	0.00311456
1959.46	143.806	1.66896	141.776	2.87689	1.14512	0.00166896	1.14308	0.00287689
1959.54	149.268	1.70694	147.563	2.75232	1.15059	0.00170694	1.14889	0.00275232
1959.62	154.56	1.74215	151.026	3.03243	1.1559	0.00174215	1.15237	0.00303243
1959.71	159.632	1.77958	154.313	3.36933	1.161	0.00177958	1.15567	0.00336933
1959.79	164.439	1.82584	160.529	3.30503	1.16582	0.00182584	1.1619	0.00330503
1959.88	168.923	1.88637	170.248	3.00531	1.17032	0.00188637	1.17165	0.00300531
1959.96	173.058	1.96378	180.36	2.98762	1.17447	0.00196378	1.18178	0.00298762
1960.04	176.826	2.05583	186.535	3.32212	1.17826	0.00205583	1.18798	0.00332212
1960.12	180.207	2.15533	187.087	3.8175	1.18165	0.00215533	1.18854	0.0038175
1960.21	183.207	2.25196	184.533	4.31731	1.18467	0.00225196	1.186	0.00431732
1960.29	185.843	2.33434	183.267	4.52937	1.18732	0.00233434	1.18474	0.00452937
1960.38	188.131	2.39159	185.707	4.33426	1.18962	0.00239159	1.1872	0.00433426
1960.46	190.106	2.41584	190.433	3.97851	1.19161	0.00241584	1.19194	0.00397851
1960.54	191.805	2.40278	193.916	3.70613	1.19333	0.00240278	1.19544	0.00370613
1960.62	193.263	2.35296	193.991	3.52365	1.1948	0.00235296	1.19553	0.00352365
1960.71	194.522	2.27237	191.88	3.4464	1.19607	0.00227237	1.19343	0.0034464
1960.79	195.619	2.17241	190.916	3.45378	1.19718	0.00217241	1.19247	0.00345378
1960.88	196.585	2.07003	193.298	3.31788	1.19816	0.00207003	1.19487	0.00331788
1960.96	197.449	1.98497	197.967	3.04427	1.19904	0.00198497	1.19956	0.00304427
1961.04	198.232	1.93572	201.715	3.15925	1.19983	0.00193572	1.20332	0.00315925
1961.12	198.946	1.93405	202.393	3.61363	1.20056	0.00193405	1.20401	0.00361363
1961.21	199.602	1.9792	200.882	3.68394	1.20123	0.0019792	1.20251	0.00368394
1961.29	200.204	2.05981	199.623	3.4776	1.20184	0.00205981	1.20126	0.0034776
1961.38	200.752	2.15816	199.542	4.11213	1.20241	0.00215816	1.20119	0.00411213
1961.46	201.25	2.25779	199.136	5.31165	1.20292	0.00225779	1.2008	0.00531165
1961.54	201.704	2.34684	197.084	5.67156	1.20338	0.00234684	1.19876	0.00567156
1961.62	202.125	2.42029	195.121	4.85033	1.20382	0.00242029	1.1968	0.00485033
1961.71	202.534	2.48012	197.134	4.07421	1.20424	0.00248012	1.19883	0.00407421
1961.79	202.963	2.53357	204.878	4.59432	1.20468	0.00253357	1.2066	0.00459432
1961.88	203.455	2.59073	214.973	5.35424	1.20519	0.00259073	1.21672	0.00535424
1961.96	204.069	2.66073	221.028	5.45181	1.20581	0.00266073	1.2228	0.00545181
1962.04	204.875	2.74855	218.935	5.28295	1.20663	0.00274855	1.22071	0.00528295
1962.12	205.954	2.85174	210.365	5.35898	1.20772	0.00285174	1.21214	0.00535898
1962.21	207.398	2.96159	201.335	5.31032	1.20918	0.00296159	1.20311	0.00531032
1962.29	209.306	3.06474	197.605	5.53362	1.21111	0.00306474	1.19939	0.00553362
1962.38	211.774	3.14561	200.935	6.77086	1.21359	0.00314561	1.20273	0.00677086
1962.46	214.901	3.19062	208.774	7.64629	1.21673	0.00319062	1.2106	0.00764629
1962.54	218.786	3.18937	217.142	6.97405	1.22064	0.00318937	1.21899	0.00697405
1962.62	223.501	3.13613	224.054	5.43354	1.22537	0.00313613	1.22592	0.00543354
1962.71	229.121	3.03094	230.803	4.57912	1.23101	0.00303094	1.2327	0.00457912
1962.79	235.708	2.87905	239.819	4.43837	1.23762	0.00287905	1.24174	0.00443837
1962.88	243.284	2.69158	251.239	4.04066	1.24522	0.00269158	1.25319	0.00404066
1962.96	251.875	2.48434	261.926	3.38674	1.25384	0.00248434	1.26391	0.00338674
1963.04	261.496	2.27632	268.274	2.90139	1.26349	0.00227632	1.27028	0.00290139
1963.12	272.107	2.08951	270.314	2.51474	1.27413	0.00208951	1.27233	0.00251474
1963.21	283.692	1.94367	272.862	2.23842	1.28574	0.00194367	1.2749	0.00223842
1963.29	296.224	1.85202	282.098	2.54564	1.29831	0.00185202	1.28416	0.00254564
1963.38	309.62	1.81661	300.5	3.05639	1.31174	0.00181661	1.30261	0.00305639
1963.46	323.837	1.82716	324.626	3.39182	1.32599	0.00182716	1.32678	0.00339182
1963.54	338.828	1.86571	347.493	3.69349	1.34102	0.00186571	1.3497	0.00369349
1963.62	354.484	1.9134	363.742	3.80206	1.35672	0.0019134	1.36599	0.00380206
1963.71	370.75	1.95513	373.92	3.5623	1.37302	0.00195513	1.3762	0.0035623
1963.79	387.563	1.98109	383.899	3.30166	1.38988	0.00198109	1.38621	0.00330166
1963.88	404.797	1.98645	399.729	3.15805	1.40716	0.00198645	1.40208	0.00315805
1963.96	422.375	1.97178	422.074	3.05312	1.42478	0.00197178	1.42448	0.00305312
1964.04	440.215	1.94155	445.594	3.20408	1.44266	0.00194155	1.44805	0.00320408
1964.12	458.155	1.90419	464.422	3.43563	1.46065	0.00190419	1.46693	0.00343563
1964.21	476.086	1.87079	478.533	3.57398	1.47863	0.00187079	1.48108	0.00357398
1964.29	493.888	1.85314	493.224	3.82797	1.49647	0.00185314	1.49581	0.00382797
1964.38	511.361	1.8611	511.868	3.97689	1.51399	0.0018611	1.5145	0.00397689
1964.46	528.361	1.89933	530.439	3.89484	1.53104	0.00189933	1.53312	0.00389484
1964.54	544.737	1.96571	541.308	3.98763	1.54746	0.00196571	1.54402	0.00398763
1964.62	560.275	2.05104	543.476	4.18108	1.56304	0.00205104	1.54621	0.00418108
1964.71	574.828	2.1432	547.246	4.04905	1.57763	0.0021432	1.55	0.00404905
1964.79	588.253	2.22924	565.731	3.62767	1.5911	0.00222924	1.56854	0.00362767
1964.88	600.38	2.2975	600.533	3.81971	1.60326	0.0022975	1.60342	0.00381971
1964.96	611.113	2.34043	637.271	5.25387	1.61403	0.00234043	1.64024	0.00525387
1965.04	620.38	2.35416	657.074	6.46532	1.62333	0.00235416	1.66009	0.00646532
1965.12	628.114	2.33909	653.541	6.19443	1.6311	0.00233909	1.65657	0.00619443
1965.21	634.32	2.29987	638.707	4.78533	1.63733	0.00229987	1.64172	0.00478533
1965.29	639.036	2.24393	630.563	3.87679	1.64207	0.00224393	1.63358	0.00387679
1965.38	642.323	2.18101	636.449	4.06397	1.64538	0.00218101	1.63949	0.00406397
1965.46	644.295	2.12085	648.107	4.15694	1.64737	0.00212085	1.65119	0.00415694
1965.54	645.089	2.07144	652.069	3.90972	1.64818	0.00207144	1.65518	0.00390972
1965.62	644.862	2.03736	643.412	3.92575	1.64797	0.00203736	1.64652	0.00392575
1965.71	643.79	2.01923	629.532	4.22912	1.64692	0.00201923	1.63263	0.00422912
1965.79	642.048	2.01366	621.898	4.4633	1.64519	0.00201366	1.625	0.0044633
1965.88	639.818	2.01593	625.533	4.69659	1.64297	0.00201593	1.62866	0.00469659
1965.96	637.26	2.02087	635.91	4.59871	1.64042	0.00202087	1.63907	0.00459871
1966.04	634.518	2.02507	644.397	4.17717	1.63769	0.00202507	1.64759	0.00417717
1966.12	631.721	2.0271	645.402	3.78096	1.63491	0.0020271	1.64861	0.00378096
1966.21	628.961	2.02725	639.179	3.57907	1.63216	0.00202725	1.6424	0.00357907
1966.29	626.3	2.02717	629.46	3.49376	1.62951	0.00202717	1.63267	0.00349376
1966.38	623.784	2.02877	619.932	3.70192	1.627	0.00202877	1.62314	0.00370192
1966.46	621.422	2.03327	612.59	3.85326	1.62465	0.00203327	1.6158	0.00385326
1966.54	619.2	2.04034	608.372	3.63747	1.62244	0.00204034	1.61159	0.00363747
1966.62	617.096	2.04859	607.91	3.49135	1.62035	0.00204859	1.61115	0.00349135
1966.71	615.067	2.05599	611.074	3.51646	1.61833	0.00205599	1.61433	0.00351646
1966.79	613.063	2.06023	616.142	3.65227	1.61634	0.00206023	1.61943	0.00365227
1966.88	611.038	2.05961	620.075	3.62607	1.61433	0.00205961	1.62339	0.00362607
1966.96	608.943	2.05387	620.39	3.8526	1.61225	0.00205387	1.62372	0.0038526
1967.04	606.734	2.04397	616.861	4.29163	1.61005	0.00204397	1.6202	0.00429163
1967.12	604.382	2.03208	611.34	4.46258	1.60771	0.00203208	1.61468	0.00446258
1967.21	601.861	2.02068	605.704	3.97982	1.6052	0.00202068	1.60905	0.00397982
1967.29	599.155	2.01249	600.142	3.55743	1.6025	0.00201249	1.60349	0.00355743
1967.38	596.269	2.00926	593.542	3.60984	1.59963	0.00200926	1.59689	0.00360984
1967.46	593.207	2.01156	585.434	3.92217	1.59658	0.00201156	1.58879	0.00392217
1967.54	589.981	2.01834	577.419	4.39406	1.59336	0.00201834	1.58077	0.00439406
1967.62	586.62	2.02786	572.494	4.70742	1.59001	0.00202786	1.57585	0.00470742
1967.71	583.15	2.0374	572.728	4.61985	1.58654	0.0020374	1.5761	0.00461985
1967.79	579.597	2.04431	577.397	4.30919	1.583	0.00204431	1.5808	0.00430919
1967.88	576.005	2.0461	582.937	4.05513	1.57942	0.0020461	1.58636	0.00405513
1967.96	572.407	2.04093	585.031	3.50602	1.57583	0.00204093	1.58848	0.00350602
1968.04	568.833	2.02737	581.856	3.08693	1.57226	0.00202737	1.58531	0.00308693
1968.12	565.329	2.00477	574.569	3.09566	1.56876	0.00200477	1.57802	0.00309566
1968.21	561.925	1.97262	566.31	3.39196	1.56537	0.00197262	1.56976	0.00339196
1968.29	558.65	1.93102	559.748	3.55122	1.5621	0.00193102	1.5632	0.00355122
1968.38	555.541	1.88064	555.15	3.39779	1.559	0.00188064	1.55861	0.00339779
1968.46	552.621	1.82313	550.821	3.1549	1.55609	0.00182313	1.55429	0.0031549
1968.54	549.904	1.76092	545.489	3.02497	1.55338	0.00176092	1.54896	0.00302497
1968.62	547.413	1.69828	539.932	2.82899	1.5509	0.00169828	1.54341	0.00282899
1968.71	545.149	1.64034	536.119	2.52856	1.54865	0.00164034	1.5396	0.00252856
1968.79	543.109	1.59297	535.217	2.36194	1.54662	0.00159297	1.53871	0.00236194
1968.88	541.288	1.56162	536.761	2.46472	1.54481	0.00156162	1.54027	0.00246472
1968.96	539.665	1.55002	539.519	2.70321	1.5432	0.00155002	1.54305	0.00270321
1969.04	538.211	1.55864	542.376	2.90517	1.54176	0.00155864	1.54593	0.00290517
1969.12	536.898	1.58453	544.109	3.10885	1.54046	0.00158453	1.54769	0.00310885
1969.21	535.684	1.62192	543.216	3.21777	1.53926	0.00162192	1.54681	0.00321777
1969.29	534.527	1.66394	539.049	3.0463	1.53811	0.00166394	1.54264	0.0030463
1969.38	533.386	1.70383	533.327	2.94163	1.53698	0.00170383	1.53692	0.00294163
1969.46	532.217	1.73619	529.453	3.15105	1.53583	0.00173619	1.53306	0.00315105
1969.54	530.981	1.75786	529.443	3.18418	1.5346	0.00175786	1.53306	0.00318418
1969.62	529.649	1.76741	531.494	3.07609	1.53329	0.00176741	1.53513	0.00307609
1969.71	528.197	1.76544	531.398	3.3782	1.53184	0.00176544	1.53505	0.0033782
1969.79	526.608	1.75398	526.84	3.82468	1.53027	0.00175398	1.5305	0.00382468
1969.88	524.883	1.73597	520.109	3.9829	1.52855	0.00173597	1.52377	0.0039829
1969.96	523.025	1.71456	516.07	3.99433	1.52671	0.00171456	1.51973	0.00399433
1970.04	521.051	1.69248	517.44	4.0249	1.52474	0.00169248	1.52112	0.0040249
1970.12	518.99	1.67199	522.14	3.98035	1.52269	0.00167199	1.52585	0.00398035
1970.21	516.872	1.6547	525.301	3.75989	1.52058	0.0016547	1.52903	0.00375989
1970.29	514.732	1.64151	523.575	3.35994	1.51845	0.00164151	1.52732	0.00335994
1970.38	512.612	1.63331	517.563	3.05116	1.51634	0.00163331	1.52131	0.00305116
1970.46	510.549	1.63093	510.515	3.08877	1.51429	0.00163093	1.51426	0.00308877
1970.54	508.573	1.63515	505.267	3.14251	1.51233	0.00163514	1.50901	0.00314251
1970.62	506.717	1.64665	502.417	2.9857	1.51048	0.00164665	1.50617	0.0029857
1970.71	504.997	1.66577	500.808	2.89297	1.50877	0.00166577	1.50457	0.00289297
1970.79	503.421	1.69195	499.269	3.10278	1.50721	0.00169195	1.50304	0.00310278
1970.88	501.99	1.72342	497.737	3.37327	1.50579	0.00172342	1.50152	0.00337327
1970.96	500.69	1.75768	497.073	3.32635	1.5045	0.00175768	1.50087	0.00332635
1971.04	499.496	1.79157	498.041	2.98952	1.50332	0.00179157	1.50186	0.00298952
1971.12	498.381	1.82167	500.369	2.78603	1.50221	0.00182167	1.50421	0.00278603
1971.21	497.303	1.84571	502.61	2.86626	1.50115	0.00184571	1.50647	0.00286626
1971.29	496.219	1.86207	502.902	2.99058	1.50008	0.00186207	1.50678	0.00299058
1971.38	495.086	1.87069	500.191	3.06506	1.49896	0.00187069	1.50407	0.00306506
1971.46	493.861	1.873	495.048	3.1657	1.49774	0.001873	1.49893	0.0031657
1971.54	492.501	1.87131	489.387	3.3632	1.4964	0.00187131	1.49327	0.0033632
1971.62	490.98	1.86884	485.291	3.62829	1.49489	0.00186884	1.48918	0.00362829
1971.71	489.272	1.86869	483.739	3.84116	1.49319	0.00186869	1.48764	0.00384116
1971.79	487.362	1.87314	484.275	3.88507	1.49129	0.00187314	1.48819	0.00388507
1971.88	485.254	1.88312	485.549	3.72011	1.48919	0.00188312	1.48948	0.00372011
1971.96	482.956	1.89835	486.172	3.50005	1.4869	0.00189835	1.49012	0.00350005
1972.04	480.484	1.9172	485.295	3.613	1.48444	0.0019172	1.48926	0.003613
1972.12	477.874	1.93753	482.813	3.98808	1.48183	0.00193753	1.48679	0.00398808
1972.21	475.156	1.95716	479.249	4.06162	1.47912	0.00195716	1.48323	0.00406162
1972.29	472.365	1.9745	475.295	3.956	1.47634	0.0019745	1.47928	0.003956
1972.38	469.543	1.98875	471.225	4.25766	1.47353	0.00198875	1.47521	0.00425766
1972.46	466.721	2.00014	466.664	4.81107	1.47071	0.00200014	1.47065	0.00481107
1972.54	463.921	2.00929	461.228	5.43904	1.46792	0.00200928	1.46522	0.00543904
1972.62	461.169	2.01725	455.475	5.98513	1.46517	0.00201725	1.45946	0.00598513
1972.71	458.47	2.02436	450.969	5.81207	1.46248	0.00202436	1.45496	0.00581207
1972.79	455.818	2.0306	449.12	4.76551	1.45984	0.0020306	1.45312	0.00476551
1972.88	453.206	2.03494	449.764	3.6745	1.45723	0.00203494	1.45378	0.0036745
1972.96	450.61	2.0357	451.067	3.29562	1.45464	0.0020357	1.4551	0.00329562
1973.04	448.001	2.03064	451.046	3.22826	1.45204	0.00203064	1.4551	0.00322826
1973.12	445.356	2.01781	449.116	3.13777	1.4494	0.00201781	1.45318	0.00313777
1973.21	442.642	1.99532	446.06	3.33853	1.4467	0.00199532	1.45013	0.00333853
1973.29	439.832	1.96247	442.672	3.91671	1.44389	0.00196247	1.44674	0.00391671
1973.38	436.917	1.91934	438.897	4.37249	1.44099	0.00191934	1.44297	0.00437249
1973.46	433.888	1.8673	434.478	4.26103	1.43796	0.0018673	1.43855	0.00426103
1973.54	430.749	1.80843	430.022	3.61019	1.43483	0.00180843	1.4341	0.00361019
1973.62	427.526	1.74577	426.745	2.93415	1.43161	0.00174577	1.43083	0.00293415
1973.71	424.25	1.68263	425.026	2.68089	1.42834	0.00168263	1.42912	0.00268089
1973.79	420.961	1.62254	423.884	2.62886	1.42506	0.00162254	1.42799	0.00262886
1973.88	417.716	1.56898	422.203	2.55452	1.42182	0.00156898	1.42632	0.00255452
1973.96	414.568	1.52488	419.976	2.54386	1.41867	0.00152488	1.4241	0.00254386
1974.04	411.569	1.49277	417.615	2.60272	1.41568	0.00149277	1.42174	0.00260272
1974.12	408.774	1.47399	414.249	2.65978	1.41289	0.00147399	1.41838	0.00265978
1974.21	406.222	1.46874	407.877	2.59657	1.41035	0.00146874	1.41201	0.00259657
1974.29	403.936	1.47566	398.101	2.43559	1.40807	0.00147566	1.40221	0.00243559
1974.38	401.934	1.49204	388.257	2.50026	1.40607	0.00149204	1.39236	0.00250026
1974.46	400.206	1.5138	383.482	2.75708	1.40436	0.0015138	1.38758	0.00275708
1974.54	398.73	1.53581	386.186	2.83024	1.40289	0.00153581	1.39031	0.00283024
1974.62	397.469	1.55282	393.533	2.74733	1.40164	0.00155282	1.39769	0.00274733
1974.71	396.371	1.56008	399.891	2.78803	1.40055	0.00156008	1.40408	0.00278803
1974.79	395.371	1.55391	401.673	2.86568	1.39956	0.00155391	1.40588	0.00286568
1974.88	394.407	1.53238	399.718	2.73204	1.39861	0.00153238	1.40394	0.00273204
1974.96	393.411	1.49555	397.355	2.46194	1.39762	0.00149555	1.40158	0.00246194
1975.04	392.318	1.44564	396.772	2.28115	1.39654	0.00144564	1.40101	0.00228115
1975.12	391.078	1.38745	397.445	2.345	1.39531	0.00138745	1.4017	0.002345
1975.21	389.648	1.32712	397.416	2.64483	1.39389	0.00132712	1.40168	0.00264483
1975.29	387.999	1.27157	395.318	2.84171	1.39225	0.00127157	1.39959	0.00284171
1975.38	386.124	1.22738	391.013	2.6788	1.39038	0.00122738	1.39529	0.0026788
1975.46	384.023	1.19859	384.945	2.36068	1.38829	0.00119859	1.38922	0.00236068
1975.54	381.713	1.18619	377.754	2.41146	1.38599	0.00118619	1.38202	0.00241146
1975.62	379.229	1.18794	370.762	2.82838	1.38351	0.00118794	1.37502	0.00282838
1975.71	376.607	1.19952	366.064	2.99816	1.38089	0.00119952	1.37032	0.00299816
1975.79	373.886	1.21677	365.289	2.71668	1.37818	0.00121677	1.36955	0.00271668
1975.88	371.119	1.2368	367.754	2.50091	1.37542	0.0012368	1.37204	0.00250091
1975.96	368.346	1.25891	370.322	2.68575	1.37265	0.00125891	1.37463	0.00268575
1976.04	365.601	1.28462	369.815	2.81405	1.36991	0.00128462	1.37414	0.00281405
1976.12	362.924	1.31672	365.843	2.74629	1.36724	0.00131672	1.37017	0.00274629
1976.21	360.332	1.35779	361.055	2.72043	1.36465	0.00135779	1.36538	0.00272043
1976.29	357.838	1.40964	358.386	2.71976	1.36216	0.00140964	1.36271	0.00271976
1976.38	355.452	1.47143	358.184	2.77594	1.35978	0.00147143	1.36252	0.00277594
1976.46	353.168	1.54063	358.133	3.1039	1.35751	0.00154063	1.36249	0.0031039
1976.54	350.976	1.61294	355.794	3.49573	1.35532	0.00161294	1.36015	0.00349573
1976.62	348.867	1.68335	350.907	3.73272	1.35322	0.00168335	1.35526	0.00373272
1976.71	346.825	1.74711	345.281	3.82433	1.35118	0.00174711	1.34963	0.00382433
1976.79	344.833	1.80034	340.955	3.61153	1.3492	0.00180034	1.34531	0.00361153
1976.88	342.882	1.84057	338.697	3.07774	1.34725	0.00184057	1.34306	0.00307774
1976.96	340.96	1.86685	337.946	2.74473	1.34534	0.00186685	1.34232	0.00274473
1977.04	339.061	1.88028	337.751	3.00203	1.34345	0.00188028	1.34213	0.00300203
1977.12	337.189	1.88351	337.541	3.39921	1.34158	0.00188351	1.34194	0.00339921
1977.21	335.344	1.88099	337.19	3.44458	1.33975	0.00188099	1.3416	0.00344458
1977.29	333.534	1.8782	336.559	3.11994	1.33794	0.0018782	1.34098	0.00311994
1977.38	331.773	1.88084	335.143	2.77515	1.33619	0.00188084	1.33957	0.00277515
1977.46	330.072	1.89408	332.339	2.57138	1.3345	0.00189408	1.33677	0.00257138
1977.54	328.441	1.92131	328.24	2.39832	1.33287	0.00192131	1.33267	0.00239832
1977.62	326.895	1.96296	324.108	2.34002	1.33134	0.00196296	1.32854	0.00234002
1977.71	325.441	2.01701	321.652	2.5266	1.32989	0.00201701	1.32609	0.0025266
1977.79	324.082	2.07897	321.61	3.08907	1.32854	0.00207897	1.32606	0.00308907
1977.88	322.82	2.14293	322.987	3.89952	1.32729	0.00214293	1.32746	0.00389952
1977.96	321.648	2.20309	323.873	4.38641	1.32613	0.00220309	1.32836	0.00438641
1978.04	320.554	2.25431	323.036	4.25372	1.32504	0.00225431	1.32753	0.00425372
1978.12	319.522	2.29246	320.715	3.90658	1.32402	0.00229246	1.32522	0.00390658
1978.21	318.531	2.31522	317.971	3.81063	1.32304	0.00231522	1.32248	0.00381063
1978.29	317.555	2.32149	315.579	3.68541	1.32207	0.00232149	1.32009	0.00368541
1978.38	316.569	2.31151	313.674	3.28809	1.3211	0.00231151	1.31819	0.00328809
1978.46	315.544	2.28611	312.192	2.88233	1.32008	0.00228611	1.31672	0.00288233
1978.54	314.453	2.24661	311.317	2.77003	1.319	0.00224661	1.31585	0.00277003
1978.62	313.275	2.19415	311.286	3.50399	1.31783	0.00219415	1.31583	0.00350399
1978.71	311.99	2.1303	311.918	4.69368	1.31655	0.0021303	1.31648	0.00469368
1978.79	310.583	2.05624	312.521	5.027	1.31516	0.00205624	1.3171	0.005027
1978.88	309.053	1.9744	312.332	4.1668	1.31363	0.0019744	1.31692	0.0041668
1978.96	307.399	1.88751	311.032	3.19504	1.31199	0.00188751	1.31563	0.00319504
1979.04	305.627	1.79995	308.882	3.14222	1.31022	0.00179995	1.31349	0.00314222
1979.12	303.758	1.71749	306.396	2.9815	1.30836	0.00171749	1.31101	0.0029815
1979.21	301.813	1.64672	303.878	2.7933	1.30642	0.00164672	1.30849	0.0027933
1979.29	299.817	1.59367	301.101	2.7512	1.30443	0.00159367	1.30572	0.0027512
1979.38	297.803	1.56291	297.699	2.69603	1.30242	0.00156291	1.30232	0.00269603
1979.46	295.802	1.55471	293.808	2.62867	1.30043	0.00155471	1.29843	0.00262867
1979.54	293.841	1.56578	290.339	2.87758	1.29847	0.00156578	1.29496	0.00287758
1979.62	291.951	1.58892	288.342	2.97412	1.29659	0.00158892	1.29297	0.00297412
1979.71	290.152	1.61567	287.928	3.03082	1.2948	0.00161567	1.29256	0.00303082
1979.79	288.459	1.63769	287.99	3.06548	1.29311	0.00163769	1.29264	0.00306548
1979.88	286.884	1.64849	287.177	3.16081	1.29154	0.00164849	1.29184	0.00316081
1979.96	285.426	1.64408	285.211	3.18157	1.29009	0.00164408	1.28988	0.00318157
1980.04	284.077	1.62307	283.069	2.90994	1.28875	0.00162307	1.28774	0.00290994
1980.12	282.828	1.58743	281.84	2.55019	1.28751	0.00158743	1.28652	0.00255019
1980.21	281.659	1.54098	281.535	2.59838	1.28635	0.00154098	1.28623	0.00259838
1980.29	280.547	1.49002	281.227	2.80749	1.28525	0.00149002	1.28593	0.00280749
1980.38	279.471	1.44187	280.239	2.85892	1.28418	0.00144187	1.28495	0.00285892
1980.46	278.404	1.40382	278.973	2.72285	1.28312	0.00140382	1.28369	0.00272285
1980.54	277.324	1.38157	278.38	2.5394	1.28205	0.00138157	1.28311	0.0025394
1980.62	276.213	1.37808	278.69	2.50309	1.28095	0.00137808	1.28344	0.00250309
1980.71	275.055	1.39232	278.815	2.42009	1.2798	0.00139232	1.28357	0.00242009
1980.79	273.84	1.42025	277.188	2.42907	1.27859	0.00142025	1.28195	0.00242907
1980.88	272.564	1.45594	273.308	2.4675	1.27733	0.00145594	1.27807	0.0024675
1980.96	271.227	1.49303	268.464	2.49702	1.276	0.00149303	1.27322	0.00249702
1981.04	269.833	1.52638	264.87	2.45838	1.27461	0.00152638	1.26963	0.00245838
1981.12	268.394	1.5524	263.933	2.73265	1.27318	0.0015524	1.2687	0.00273265
1981.21	266.919	1.56961	265.142	3.08532	1.27171	0.00156961	1.26993	0.00308532
1981.29	265.42	1.57852	266.584	3.25578	1.27022	0.00157852	1.27139	0.00325578
1981.38	263.911	1.58142	266.488	3.23318	1.26872	0.00158142	1.2713	0.00323318
1981.46	262.404	1.58141	264.48	3.05914	1.26722	0.00158141	1.2693	0.00305914
1981.54	260.906	1.58193	261.532	2.83225	1.26573	0.00158193	1.26635	0.00283225
1981.62	259.428	1.58622	258.954	2.77206	1.26426	0.00158622	1.26378	0.00277206
1981.71	257.973	1.59594	257.373	2.69748	1.26281	0.00159594	1.2622	0.00269748
1981.79	256.543	1.61139	256.491	2.4087	1.26138	0.00161139	1.26133	0.0024087
1981.88	255.14	1.63159	255.524	2.4791	1.25999	0.00163159	1.26037	0.0024791
1981.96	253.762	1.65446	253.849	2.99879	1.25862	0.00165446	1.25871	0.00299879
1982.04	252.404	1.67769	251.451	3.25961	1.25727	0.00167769	1.25631	0.00325961
1982.12	251.067	1.6991	248.969	3.31843	1.25594	0.0016991	1.25383	0.00331843
1982.21	249.745	1.71726	247.241	3.42273	1.25462	0.00171726	1.25211	0.00342273
1982.29	248.435	1.73106	246.674	3.12746	1.25332	0.00173106	1.25155	0.00312746
1982.38	247.138	1.73973	246.899	2.45042	1.25203	0.00173973	1.25179	0.00245042
1982.46	245.851	1.74308	247.077	2.39707	1.25075	0.00174308	1.25198	0.00239707
1982.54	244.574	1.74069	246.561	2.75755	1.24948	0.00174069	1.25148	0.00275755
1982.62	243.31	1.7326	245.26	2.92844	1.24823	0.0017326	1.25018	0.00292844
1982.71	242.059	1.7193	243.384	3.29332	1.24698	0.0017193	1.24831	0.00329332
1982.79	240.819	1.70214	241.029	3.51627	1.24575	0.00170214	1.24596	0.00351627
1982.88	239.594	1.68385	238.207	3.04463	1.24453	0.00168385	1.24314	0.00304463
1982.96	238.382	1.66828	235.224	2.33491	1.24333	0.00166828	1.24016	0.00233491
1983.04	237.179	1.66062	232.836	2.21761	1.24213	0.00166062	1.23777	0.00221761
1983.12	235.987	1.66573	231.831	2.53727	1.24095	0.00166573	1.23678	0.00253727
1983.21	234.801	1.68712	232.407	3.00407	1.23977	0.00168712	1.23737	0.00300407
1983.29	233.614	1.72561	234.035	3.49534	1.23859	0.00172561	1.23901	0.00349534
1983.38	232.426	1.77829	235.771	3.76117	1.23741	0.00177829	1.24077	0.00376117
1983.46	231.23	1.83946	236.606	3.66317	1.23622	0.00183946	1.24162	0.00366317
1983.54	230.023	1.90126	235.631	3.29265	1.23502	0.00190126	1.24065	0.00329265
1983.62	228.805	1.95509	232.372	2.96708	1.23381	0.00195509	1.2374	0.00296708
1983.71	227.575	1.99345	227.404	2.97258	1.23259	0.00199345	1.23242	0.00297258
1983.79	226.333	2.01037	222.575	3.15159	1.23136	0.00201037	1.22758	0.00315159
1983.88	225.086	2.00231	220.076	3.10613	1.23012	0.00200231	1.22509	0.00310613
1983.96	223.838	1.96817	220.595	2.76722	1.22888	0.00196817	1.22562	0.00276722
1984.04	222.596	1.90935	222.465	2.63695	1.22764	0.00190935	1.22751	0.00263695
1984.12	221.371	1.82976	222.98	3.03923	1.22642	0.00182976	1.22804	0.00303923
1984.21	220.17	1.73544	221.016	3.36433	1.22523	0.00173544	1.22608	0.00336433
1984.29	219.002	1.63395	218.175	3.13739	1.22407	0.00163395	1.22324	0.00313739
1984.38	217.876	1.53421	217.064	2.66007	1.22295	0.00153421	1.22213	0.00266007
1984.46	216.799	1.44542	218.32	2.61532	1.22188	0.00144542	1.22341	0.00261532
1984.54	215.773	1.37601	219.759	2.87205	1.22086	0.00137601	1.22487	0.00287205
1984.62	214.8	1.33288	218.65	3.00805	1.2199	0.00133288	1.22377	0.00300805
1984.71	213.88	1.31918	214.698	2.98859	1.21899	0.00131918	1.21981	0.00298859
1984.79	213.005	1.33421	210.379	2.72076	1.21812	0.00133421	1.21548	0.00272076
1984.88	212.171	1.37317	208.351	2.39167	1.2173	0.00137317	1.21346	0.00239167
1984.96	211.367	1.42904	208.773	2.53172	1.2165	0.00142904	1.2139	0.00253172
1985.04	210.581	1.49347	209.509	2.85243	1.21572	0.00149347	1.21465	0.00285243
1985.12	209.804	1.55837	208.709	2.86413	1.21496	0.00155837	1.21386	0.00286413
1985.21	209.023	1.61611	206.878	2.59257	1.21418	0.00161611	1.21203	0.00259257
1985.29	208.227	1.66044	206.149	2.63413	1.2134	0.00166044	1.21131	0.00263413
1985.38	207.409	1.68638	207.702	3.58087	1.21259	0.00168638	1.21288	0.00358087
1985.46	206.562	1.6906	210.156	4.48524	1.21175	0.0016906	1.21536	0.00448524
1985.54	205.68	1.67227	210.714	4.45274	1.21087	0.00167227	1.21593	0.00445274
1985.62	204.764	1.63253	207.935	3.72449	1.20997	0.00163253	1.21315	0.00372449
1985.71	203.815	1.57534	203.29	3.09077	1.20903	0.00157534	1.2085	0.00309077
1985.79	202.834	1.50659	199.851	2.65675	1.20805	0.00150659	1.20506	0.00265675
1985.88	201.83	1.4345	199.424	2.25584	1.20706	0.0014345	1.20464	0.00225584
1985.96	200.806	1.36749	200.911	2.26757	1.20604	0.00136749	1.20615	0.00226757
1986.04	199.767	1.31329	201.544	2.62996	1.20501	0.00131329	1.20679	0.00262996
1986.12	198.72	1.2765	199.579	2.82544	1.20397	0.0012765	1.20483	0.00282544
1986.21	197.668	1.25763	195.786	2.75347	1.20293	0.00125763	1.20103	0.00275347
1986.29	196.611	1.25311	192.461	2.60605	1.20188	0.00125311	1.19771	0.00260605
1986.38	195.552	1.25686	191.307	2.55254	1.20082	0.00125686	1.19656	0.00255254
1986.46	194.487	1.26278	192.245	2.59509	1.19977	0.00126278	1.19751	0.00259509
1986.54	193.413	1.26644	193.971	2.47776	1.1987	0.00126644	1.19926	0.00247776
1986.62	192.326	1.26612	195.117	2.21397	1.19762	0.00126612	1.20042	0.00221397
1986.71	191.223	1.26278	194.915	2.27083	1.19652	0.00126278	1.20023	0.00227083
1986.79	190.098	1.25921	193.211	2.45421	1.19541	0.00125921	1.19853	0.00245421
1986.88	188.951	1.25913	190.442	2.41799	1.19427	0.00125913	1.19576	0.00241799
1986.96	187.783	1.26548	187.574	2.3714	1.19311	0.00126548	1.1929	0.0023714
1987.04	186.597	1.27921	185.645	2.19521	1.19193	0.00127921	1.19097	0.00219521
1987.12	185.402	1.29881	184.964	1.8377	1.19074	0.00129881	1.1903	0.0018377
1987.21	184.208	1.32075	184.77	2.08835	1.18955	0.00132075	1.19011	0.00208835
1987.29	183.028	1.34048	183.959	2.77665	1.18838	0.00134048	1.18931	0.00277665
1987.38	181.881	1.35348	182.217	3.20009	1.18724	0.00135348	1.18757	0.00320009
1987.46	180.784	1.3564	180.334	3.20357	1.18615	0.0013564	1.18569	0.00320357
1987.54	179.751	1.34778	179.348	2.72527	1.18512	0.00134778	1.18472	0.00272527
1987.62	178.803	1.32803	179.469	2.01433	1.18418	0.00132803	1.18485	0.00201433
1987.71	177.952	1.29954	179.927	1.79424	1.18334	0.00129954	1.18532	0.00179424
1987.79	177.203	1.2664	179.791	1.93942	1.1826	0.0012664	1.1852	0.00193942
1987.88	176.565	1.23367	178.768	1.88871	1.18197	0.00123367	1.18418	0.00188871
1987.96	176.031	1.20671	177.24	1.79609	1.18144	0.00120671	1.18266	0.00179609
1988.04	175.594	1.18951	175.762	1.77893	1.18102	0.00118951	1.18119	0.00177893
1988.12	175.237	1.18448	174.671	1.78238	1.18067	0.00118448	1.1801	0.00178238
1988.21	174.94	1.19087	174.057	1.85393	1.18038	0.00119087	1.1795	0.00185393
1988.29	174.676	1.20566	173.861	1.75737	1.18013	0.00120566	1.17931	0.00175737
1988.38	174.418	1.22381	173.869	1.51483	1.17988	0.00122381	1.17933	0.00151483
1988.46	174.133	1.23995	173.765	1.82059	1.17961	0.00123995	1.17924	0.00182059
1988.54	173.794	1.24901	173.386	2.36663	1.17928	0.00124901	1.17887	0.00236663
1988.62	173.372	1.24709	172.958	2.75034	1.17887	0.00124709	1.17845	0.00275034
1988.71	172.845	1.23166	172.929	3.21289	1.17835	0.00123166	1.17843	0.00321289
1988.79	172.195	1.20194	173.422	3.38305	1.17771	0.00120194	1.17894	0.00338305
1988.88	171.413	1.15894	173.854	2.79594	1.17693	0.00115894	1.17939	0.00279594
1988.96	170.494	1.10518	173.243	1.97871	1.17602	0.00110518	1.17879	0.00197871
1989.04	169.443	1.04437	171.067	1.90777	1.17498	0.00104437	1.17661	0.00190777
1989.12	168.271	0.98102	167.896	1.73992	1.17381	0.00098102	1.17344	0.00173992
1989.21	166.997	0.920211	165.062	1.40588	1.17254	0.000920211	1.1706	0.00140588
1989.29	165.64	0.866437	163.607	1.44742	1.17119	0.000866437	1.16915	0.00144742
1989.38	164.229	0.823016	163.336	1.37733	1.16979	0.000823016	1.16889	0.00137733
1989.46	162.79	0.791295	163.01	1.49576	1.16835	0.000791295	1.16857	0.00149576
1989.54	161.349	0.770733	161.537	1.73538	1.16692	0.000770733	1.16711	0.00173538
1989.62	159.936	0.759345	159.004	1.66205	1.16551	0.000759345	1.16457	0.00166205
1989.71	158.571	0.75447	156.57	1.54151	1.16415	0.00075447	1.16214	0.00154151
1989.79	157.275	0.753677	155.384	1.19216	1.16286	0.000753677	1.16096	0.00119216
1989.88	156.064	0.755017	155.6	1.04084	1.16165	0.000755017	1.16119	0.00104084
1989.96	154.947	0.757606	156.362	1.12168	1.16054	0.000757606	1.16196	0.00112168
1990.04	153.93	0.760255	156.638	1.22628	1.15953	0.000760255	1.16225	0.00122628
1990.12	153.016	0.762527	155.969	1.2734	1.15863	0.000762527	1.16159	0.0012734
1990.21	152.199	0.763325	154.528	1.478	1.15782	0.000763325	1.16016	0.001478
1990.29	151.475	0.761254	152.675	1.52534	1.1571	0.000761254	1.15831	0.00152534
1990.38	150.834	0.755307	150.688	1.50536	1.15647	0.000755307	1.15632	0.00150536
1990.46	150.265	0.744462	148.862	1.65616	1.15591	0.000744462	1.1545	0.00165616
1990.54	149.755	0.72845	147.659	1.73136	1.15541	0.00072845	1.1533	0.00173136
1990.62	149.294	0.708306	147.466	1.49651	1.15496	0.000708306	1.15312	0.00149651
1990.71	148.866	0.686075	148.111	1.16873	1.15454	0.000686075	1.15378	0.00116873
1990.79	148.46	0.664746	148.79	1.1359	1.15414	0.000664746	1.15447	0.0011359
1990.88	148.063	0.648393	148.656	1.18785	1.15375	0.000648393	1.15435	0.00118785
1990.96	147.663	0.640461	147.627	1.10814	1.15336	0.000640461	1.15333	0.00110814
1991.04	147.251	0.643339	146.517	1.00641	1.15296	0.000643339	1.15222	0.00100641
1991.12	146.817	0.657063	146.168	1.05888	1.15254	0.000657063	1.15188	0.00105888
1991.21	146.352	0.679316	146.497	1.1341	1.15208	0.000679316	1.15223	0.0011341
1991.29	145.849	0.706463	146.519	1.09494	1.15159	0.000706463	1.15226	0.00109494
1991.38	145.305	0.734112	145.306	1.1377	1.15105	0.000734112	1.15105	0.0011377
1991.46	144.715	0.758254	142.954	1.35374	1.15047	0.000758254	1.1487	0.00135374
1991.54	144.077	0.776388	140.563	1.47969	1.14984	0.000776388	1.14631	0.00147969
1991.62	143.396	0.787495	139.295	1.38363	1.14917	0.000787495	1.14505	0.00138363
1991.71	142.672	0.792637	139.389	1.14483	1.14845	0.000792637	1.14515	0.00114483
1991.79	141.911	0.795647	140.109	0.98165	1.1477	0.000795647	1.14589	0.00098165
1991.88	141.123	0.80304	140.518	1.09791	1.14692	0.00080304	1.14631	0.00109791
1991.96	140.315	0.823486	140.287	1.28895	1.14612	0.000823486	1.14609	0.00128895
1992.04	139.497	0.865679	139.773	1.34174	1.14531	0.000865679	1.14558	0.00134174
1992.12	138.681	0.935406	139.434	1.32538	1.1445	0.000935406	1.14526	0.00132538
1992.21	137.877	1.0333	139.236	1.33053	1.1437	0.0010333	1.14507	0.00133053
1992.29	137.092	1.15515	138.665	1.3391	1.14292	0.00115515	1.14451	0.0013391
1992.38	136.337	1.29253	137.301	1.42441	1.14218	0.00129253	1.14315	0.00142441
1992.46	135.615	1.43589	135.36	1.61439	1.14146	0.00143589	1.14121	0.00161439
1992.54	134.931	1.57588	133.65	1.76705	1.14079	0.00157588	1.1395	0.00176705
1992.62	134.286	1.70324	132.933	1.81873	1.14015	0.00170324	1.13879	0.00181873
1992.71	133.679	1.81069	133.233	1.84094	1.13955	0.00181069	1.1391	0.00184094
1992.79	133.107	1.89302	133.807	1.92023	1.13899	0.00189302	1.13969	0.00192023
1992.88	132.569	1.94698	133.836	2.12456	1.13846	0.00194698	1.13973	0.00212456
1992.96	132.059	1.97227	133.218	2.51345	1.13796	0.00197227	1.13912	0.00251345
1993.04	131.573	1.9717	132.609	2.98753	1.13748	0.0019717	1.13852	0.00298753
1993.12	131.109	1.9504	132.62	3.23028	1.13703	0.0019504	1.13854	0.00323028
1993.21	130.666	1.91609	133.021	3.03362	1.13659	0.00191609	1.13896	0.00303362
1993.29	130.242	1.87719	132.926	2.61897	1.13618	0.00187719	1.13887	0.00261897
1993.38	129.84	1.84202	131.846	2.38684	1.13578	0.00184202	1.1378	0.00238684
1993.46	129.461	1.81657	130.402	2.24304	1.13541	0.00181657	1.13636	0.00224304
1993.54	129.107	1.80296	129.744	2.06911	1.13507	0.00180296	1.13571	0.00206911
1993.62	128.78	1.79938	130.197	2.23728	1.13475	0.00179938	1.13618	0.00223728
1993.71	128.482	1.80065	130.695	2.67966	1.13446	0.00180065	1.13669	0.00267966
1993.79	128.212	1.79994	129.798	3.07762	1.1342	0.00179994	1.1358	0.00307762
1993.88	127.967	1.79083	127.279	3.44153	1.13397	0.00179083	1.13328	0.00344153
1993.96	127.74	1.76901	124.594	3.58681	1.13375	0.00176901	1.13059	0.00358681
1994.04	127.523	1.73269	123.689	3.26289	1.13355	0.00173269	1.12969	0.00326289
1994.12	127.304	1.68308	125.311	2.77369	1.13334	0.00168308	1.13133	0.00277369
1994.21	127.07	1.62362	128.347	2.64142	1.13311	0.00162362	1.1344	0.00264142
1994.29	126.805	1.5592	130.681	2.66906	1.13286	0.0015592	1.13676	0.00266906
1994.38	126.495	1.49499	130.736	2.54445	1.13256	0.00149499	1.13682	0.00254445
1994.46	126.127	1.43479	128.557	2.39893	1.1322	0.00143479	1.13464	0.00239893
1994.54	125.689	1.37988	125.706	2.39087	1.13177	0.00137988	1.13179	0.00239087
1994.62	125.174	1.32947	124.105	2.66643	1.13126	0.00132947	1.13019	0.00266643
1994.71	124.581	1.27987	124.556	3.18005	1.13068	0.00127987	1.13065	0.00318005
1994.79	123.91	1.22695	126.1	3.39394	1.13002	0.00122695	1.13222	0.00339394
1994.88	123.171	1.16692	126.786	2.94441	1.12928	0.00116692	1.13292	0.00294441
1994.96	122.375	1.09747	125.344	2.1192	1.1285	0.00109747	1.13148	0.0021192
1995.04	121.537	1.01844	122.242	1.54779	1.12766	0.00101844	1.12837	0.00154779
1995.12	120.677	0.932385	119.206	1.34704	1.12681	0.000932385	1.12533	0.00134704
1995.21	119.813	0.84361	117.608	1.20574	1.12595	0.00084361	1.12374	0.00120574
1995.29	118.964	0.758118	117.358	1.10626	1.12511	0.000758118	1.1235	0.00110626
1995.38	118.148	0.682573	117.229	1.11096	1.1243	0.000682573	1.12338	0.00111096
1995.46	117.378	0.622674	116.174	1.1841	1.12354	0.000622674	1.12233	0.0011841
1995.54	116.662	0.581465	114.287	1.23232	1.12283	0.000581465	1.12044	0.00123232
1995.62	116.004	0.558112	112.625	1.30316	1.12218	0.000558112	1.11878	0.00130316
1995.71	115.404	0.548652	112.211	1.4245	1.12159	0.000548652	1.11838	0.0014245
1995.79	114.855	0.547722	113.216	1.41344	1.12105	0.000547722	1.1194	0.00141344
1995.88	114.349	0.551091	114.909	1.25582	1.12055	0.000551091	1.12111	0.00125582
1995.96	113.873	0.556421	116.279	1.2053	1.12008	0.000556421	1.1225	0.0012053
1996.04	113.414	0.563053	116.725	1.24151	1.11963	0.000563053	1.12296	0.00124151
1996.12	112.961	0.571619	116.288	1.15314	1.11919	0.000571619	1.12253	0.00115314
1996.21	112.502	0.582816	115.329	1.07115	1.11874	0.000582816	1.12158	0.00107115
1996.29	112.029	0.596497	114.07	1.15153	1.11827	0.000596497	1.12033	0.00115153
1996.38	111.541	0.611857	112.514	1.21759	1.11779	0.000611857	1.11877	0.00121759
1996.46	111.036	0.627405	110.786	1.21297	1.1173	0.000627405	1.11705	0.00121297
1996.54	110.519	0.641597	109.383	1.22608	1.11679	0.000641597	1.11565	0.00122608
1996.62	110	0.653398	108.843	1.26467	1.11628	0.000653398	1.11511	0.00126467
1996.71	109.488	0.66206	109.047	1.32892	1.11577	0.00066206	1.11533	0.00132892
1996.79	108.995	0.667687	109.077	1.40251	1.11529	0.000667687	1.11537	0.00140251
1996.88	108.534	0.67097	108.03	1.44054	1.11484	0.00067097	1.11433	0.00144054
1996.96	108.114	0.6726	106.073	1.43008	1.11443	0.0006726	1.11237	0.00143008
1997.04	107.744	0.673122	104.527	1.29904	1.11406	0.000673122	1.11083	0.00129904
1997.12	107.426	0.672558	104.717	1.0674	1.11376	0.000672558	1.11103	0.0010674
1997.21	107.159	0.670516	106.638	1.13358	1.1135	0.000670516	1.11298	0.00113358
1997.29	106.939	0.666344	108.852	1.51022	1.11329	0.000666344	1.11521	0.00151022
1997.38	106.754	0.659087	109.706	1.70869	1.11311	0.000659087	1.11608	0.00170869
1997.46	106.59	0.648753	108.72	1.63373	1.11296	0.000648753	1.1151	0.00163373
1997.54	106.431	0.635943	106.835	1.51512	1.11281	0.000635943	1.11322	0.00151512
1997.62	106.257	0.622493	105.483	1.43676	1.11265	0.000622493	1.11187	0.00143676
1997.71	106.051	0.611198	105.418	1.31178	1.11245	0.000611198	1.11182	0.00131178
1997.79	105.795	0.605673	106.302	1.29615	1.11221	0.000605673	1.11272	0.00129615
1997.88	105.476	0.608867	107.163	1.41182	1.1119	0.000608867	1.11359	0.00141182
1997.96	105.082	0.622494	107.181	1.37683	1.11151	0.000622494	1.11362	0.00137683
1998.04	104.607	0.645808	106.161	1.27276	1.11104	0.000645808	1.11261	0.00127276
1998.12	104.052	0.675831	104.497	1.374	1.1105	0.000675831	1.11095	0.001374
1998.21	103.421	0.708438	102.786	1.46487	1.10987	0.000708438	1.10924	0.00146487
1998.29	102.722	0.739029	101.477	1.39177	1.10918	0.000739029	1.10793	0.00139177
1998.38	101.97	0.763268	100.735	1.38832	1.10844	0.000763268	1.10719	0.00138832
1998.46	101.182	0.777992	100.474	1.5751	1.10766	0.000777992	1.10694	0.0015751
1998.54	100.374	0.781177	100.449	1.7585	1.10685	0.000781177	1.10693	0.0017585
1998.62	99.5684	0.771915	100.319	1.73872	1.10605	0.000771915	1.10681	0.00173872
1998.71	98.7816	0.750676	99.7619	1.46736	1.10527	0.000750676	1.10626	0.00146736
1998.79	98.0298	0.719028	98.6587	1.08087	1.10453	0.000719028	1.10516	0.00108087
1998.88	97.3286	0.679551	97.2118	0.761605	1.10384	0.000679551	1.10372	0.000761605
1998.96	96.6875	0.635481	95.853	0.576797	1.1032	0.000635481	1.10236	0.000576797
1999.04	96.112	0.590451	94.9878	0.519095	1.10263	0.000590451	1.1015	0.000519095
1999.12	95.6058	0.548106	94.7541	0.513036	1.10214	0.000548106	1.10128	0.000513036
1999.21	95.1661	0.511582	94.9463	0.578966	1.1017	0.000511582	1.10148	0.000578966
1999.29	94.7869	0.482501	95.1459	0.764747	1.10133	0.000482501	1.1017	0.000764747
1999.38	94.4603	0.46137	94.9592	0.920173	1.10102	0.00046137	1.10152	0.000920173
1999.46	94.1745	0.447434	94.2694	0.961554	1.10074	0.000447434	1.10084	0.000961554
1999.54	93.9166	0.438786	93.3409	0.951463	1.10049	0.000438786	1.09991	0.000951463
1999.62	93.6735	0.433918	92.6702	0.953598	1.10026	0.000433918	1.09925	0.000953598
1999.71	93.4313	0.431567	92.6178	0.956692	1.10003	0.000431567	1.09921	0.000956692
1999.79	93.1773	0.431531	93.1265	0.935556	1.09978	0.000431531	1.09973	0.000935556
1999.88	92.9007	0.434018	93.777	0.917555	1.09951	0.000434018	1.1004	0.000917555
1999.96	92.5921	0.439377	94.1514	0.979663	1.09921	0.000439377	1.10078	0.000979663
2000.04	92.2439	0.447977	94.1233	1.08443	1.09888	0.000447977	1.10077	0.00108443
2000.12	91.8528	0.459421	93.788	1.11445	1.09849	0.000459421	1.10044	0.00111445
2000.21	91.4165	0.472974	93.1483	1.08464	1.09807	0.000472974	1.09981	0.00108464
2000.29	90.9349	0.487331	91.9852	1.10509	1.09759	0.000487331	1.09865	0.00110509
2000.38	90.412	0.501372	90.1662	1.1571	1.09708	0.000501372	1.09683	0.0011571
2000.46	89.8522	0.51382	88.0664	1.0873	1.09652	0.00051382	1.09473	0.0010873
2000.54	89.2611	0.524174	86.5527	0.82019	1.09594	0.000524174	1.09322	0.00082019
2000.62	88.6479	0.532102	86.3389	0.577213	1.09533	0.000532102	1.09301	0.000577213
2000.71	88.0201	0.537913	87.2497	0.719286	1.09471	0.000537913	1.09394	0.000719286
2000.79	87.3859	0.542113	88.2339	0.880665	1.09409	0.000542113	1.09494	0.000880665
2000.88	86.7555	0.54555	88.2364	0.864467	1.09346	0.00054555	1.09495	0.000864467
2000.96	86.1364	0.549029	87.1528	0.883216	1.09285	0.000549029	1.09387	0.000883216
2001.04	85.5352	0.55342	85.8606	1.05518	1.09226	0.00055342	1.09259	0.00105518
2001.12	84.9599	0.559199	85.288	1.20719	1.09169	0.000559199	1.09202	0.00120719
2001.21	84.4148	0.566865	85.4639	1.18592	1.09115	0.000566865	1.09221	0.00118592
2001.29	83.9026	0.576613	85.5678	0.949216	1.09065	0.000576613	1.09232	0.000949216
2001.38	83.4263	0.58827	84.8641	0.703903	1.09018	0.00058827	1.09163	0.000703903
2001.46	82.9857	0.601815	83.4886	0.806633	1.08975	0.000601815	1.09025	0.000806633
2001.54	82.5786	0.616768	82.2474	1.011	1.08935	0.000616768	1.08902	0.001011
2001.62	82.2028	0.632414	81.7276	1.12915	1.08898	0.000632414	1.0885	0.00112915
2001.71	81.8534	0.648055	81.7178	1.29596	1.08864	0.000648055	1.0885	0.00129596
2001.79	81.5245	0.662634	81.5657	1.47937	1.08832	0.000662634	1.08836	0.00147937
2001.88	81.2103	0.674987	80.9885	1.49091	1.08802	0.000674987	1.08779	0.00149091
2001.96	80.9038	0.684079	80.4096	1.34594	1.08772	0.000684079	1.08722	0.00134594
2002.04	80.5973	0.688869	80.4627	1.22254	1.08742	0.000688869	1.08729	0.00122254
2002.12	80.2847	0.688686	81.2222	1.11534	1.08712	0.000688686	1.08806	0.00111534
2002.21	79.9596	0.683357	81.9997	0.952755	1.0868	0.000683357	1.08885	0.000952755
2002.29	79.6158	0.672785	81.9164	0.878482	1.08647	0.000672785	1.08878	0.000878482
2002.38	79.2494	0.657517	80.6861	0.973129	1.08611	0.000657517	1.08755	0.000973129
2002.46	78.8567	0.638256	78.8628	1.12525	1.08572	0.000638256	1.08573	0.00112525
2002.54	78.4347	0.615972	77.3582	1.22771	1.08531	0.000615972	1.08423	0.00122771
2002.62	77.983	0.591786	76.7155	1.21083	1.08487	0.000591786	1.08359	0.00121083
2002.71	77.5007	0.566658	76.7526	1.09544	1.08439	0.000566658	1.08364	0.00109544
2002.79	76.9878	0.541351	76.844	0.937068	1.08389	0.000541351	1.08374	0.000937068
2002.88	76.4466	0.516815	76.4886	0.773662	1.08335	0.000516815	1.0834	0.000773662
2002.96	75.8785	0.49347	75.6708	0.681866	1.08279	0.00049347	1.08258	0.000681866
2003.04	75.2849	0.472583	74.7685	0.712108	1.08221	0.000472583	1.08169	0.000712108
2003.12	74.6702	0.455173	74.1785	0.793379	1.0816	0.000455173	1.0811	0.000793379
2003.21	74.0369	0.443126	73.9741	0.830072	1.08097	0.000443126	1.08091	0.000830072
2003.29	73.3883	0.438427	73.8562	0.778803	1.08033	0.000438427	1.0808	0.000778803
2003.38	72.7305	0.442671	73.4108	0.692799	1.07968	0.000442671	1.08036	0.000692799
2003.46	72.0684	0.456573	72.4923	0.668851	1.07902	0.000456573	1.07945	0.000668851
2003.54	71.4079	0.479371	71.4033	0.745918	1.07837	0.000479371	1.07836	0.000745918
2003.62	70.7581	0.508987	70.6334	0.948946	1.07773	0.000508987	1.0776	0.000948946
2003.71	70.1273	0.542138	70.3132	1.16766	1.0771	0.000542138	1.07729	0.00116766
2003.79	69.5243	0.575611	69.9927	1.19564	1.07651	0.000575611	1.07698	0.00119564
2003.88	68.9612	0.605956	69.1047	1.04745	1.07595	0.000605956	1.07609	0.00104745
2003.96	68.4477	0.630547	67.7107	1.01186	1.07544	0.000630547	1.0747	0.00101186
2004.04	67.9937	0.647272	66.6421	1.08268	1.075	0.000647272	1.07364	0.00108268
2004.12	67.6094	0.654698	66.7331	0.986939	1.07462	0.000654698	1.07374	0.000986939
2004.21	67.3014	0.65246	67.904	0.753405	1.07432	0.00065246	1.07493	0.000753405
2004.29	67.0741	0.640721	69.1498	0.62418	1.0741	0.000640721	1.07619	0.00062418
2004.38	66.9293	0.620578	69.4404	0.754001	1.07397	0.000620578	1.0765	0.000754001
2004.46	66.8642	0.593643	68.5743	1.00729	1.07392	0.000593643	1.07564	0.00100729
2004.54	66.8718	0.561967	67.1136	1.12345	1.07393	0.000561967	1.07418	0.00112345
2004.62	66.9409	0.527935	65.692	0.994232	1.07401	0.000527935	1.07276	0.000994232
2004.71	67.0563	0.493749	64.5414	0.768158	1.07414	0.000493749	1.07161	0.000768158
2004.79	67.1997	0.461652	63.6981	0.653794	1.0743	0.000461652	1.07077	0.000653794
2004.88	67.349	0.433159	63.4375	0.657779	1.07446	0.000433159	1.07052	0.000657779
2004.96	67.4819	0.40935	64.2833	0.771041	1.0746	0.00040935	1.07138	0.000771041
2005.04	67.5755	0.390777	66.4921	0.929398	1.07471	0.000390777	1.07362	0.000929398
2005.12	67.6079	0.377841	69.4975	0.996276	1.07475	0.000377841	1.07665	0.000996276
2005.21	67.56	0.370773	71.9703	0.900626	1.07471	0.000370773	1.07915	0.000900626
2005.29	67.4167	0.369813	72.5467	0.753772	1.07458	0.000369813	1.07974	0.000753772
2005.38	67.1679	0.375321	70.9116	0.768231	1.07434	0.000375321	1.07811	0.000768231
2005.46	66.809	0.386958	68.1301	0.772081	1.07399	0.000386958	1.07532	0.000772081
2005.54	66.341	0.404033	65.8241	0.801945	1.07353	0.000404033	1.07301	0.000801945
2005.62	65.7724	0.424741	64.8895	0.708645	1.07297	0.000424741	1.07208	0.000708645
2005.71	65.116	0.44676	64.8799	0.723562	1.07232	0.00044676	1.07208	0.000723562
2005.79	64.3886	0.467722	64.6433	0.866519	1.0716	0.000467722	1.07185	0.000866519
2005.88	63.6136	0.48526	63.5044	1.00191	1.07083	0.00048526	1.07072	0.00100191
2005.96	62.8137	0.497749	61.8477	1.09257	1.07003	0.000497749	1.06906	0.00109257
2006.04	62.0129	0.504628	60.6025	1.08274	1.06924	0.000504628	1.06782	0.00108274
2006.12	61.2368	0.506566	60.2405	1.05995	1.06847	0.000506566	1.06746	0.00105995
2006.21	60.5062	0.505745	60.2967	1.06977	1.06774	0.000505745	1.06753	0.00106977
2006.29	59.839	0.505615	59.9028	1.01628	1.06708	0.000505615	1.06714	0.00101628
2006.38	59.251	0.510528	58.7721	0.928577	1.0665	0.000510528	1.06602	0.000928577
2006.46	58.7503	0.524329	57.6229	0.89156	1.06601	0.000524329	1.06487	0.00089156
2006.54	58.3408	0.548983	57.5428	0.909842	1.0656	0.000548983	1.0648	0.000909842
2006.62	58.0221	0.58378	58.8384	0.89234	1.06529	0.00058378	1.06612	0.00089234
2006.71	57.7876	0.625466	60.5311	0.829358	1.06507	0.000625466	1.06783	0.000829358
2006.79	57.6269	0.669371	61.1114	0.861687	1.06492	0.000669371	1.06843	0.000861687
2006.88	57.5269	0.710089	59.9066	1.10846	1.06483	0.000710089	1.06722	0.00110846
2006.96	57.4713	0.74324	57.7452	1.43803	1.06478	0.00074324	1.06506	0.00143803
2007.04	57.443	0.764942	56.2242	1.52213	1.06476	0.000764942	1.06354	0.00152213
2007.12	57.4251	0.772778	56.1828	1.51607	1.06476	0.000772778	1.06351	0.00151607
2007.21	57.4008	0.765659	57.1639	1.35301	1.06474	0.000765659	1.0645	0.00135301
2007.29	57.3559	0.743864	57.987	1.17551	1.06471	0.000743864	1.06534	0.00117551
2007.38	57.2781	0.709243	57.896	1.0166	1.06464	0.000709243	1.06526	0.0010166
2007.46	57.1585	0.664651	57.1638	0.856099	1.06453	0.000664651	1.06454	0.000856099
2007.54	56.9908	0.61411	56.6475	0.734976	1.06437	0.00061411	1.06403	0.000734976
2007.62	56.7731	0.562962	56.8601	0.713902	1.06417	0.000562962	1.06425	0.000713902
2007.71	56.5059	0.516501	57.4976	0.794289	1.06391	0.000516501	1.06491	0.000794289
2007.79	56.1922	0.479882	57.8257	0.884031	1.0636	0.000479882	1.06525	0.000884031
2007.88	55.8386	0.456406	57.4228	0.898171	1.06326	0.000456406	1.06485	0.000898171
2007.96	55.4525	0.446767	56.497	0.83703	1.06288	0.000446767	1.06393	0.00083703
2008.04	55.0418	0.448474	55.5188	0.790576	1.06248	0.000448474	1.06296	0.000790576
2008.12	54.6168	0.457529	54.6946	0.812194	1.06206	0.000457529	1.06214	0.000812194
2008.21	54.1858	0.469799	53.8766	0.818966	1.06163	0.000469799	1.06132	0.000818966
2008.29	53.7566	0.482107	52.9573	0.817322	1.06121	0.000482107	1.06041	0.000817322
2008.38	53.3372	0.492659	52.1784	0.885258	1.0608	0.000492659	1.05963	0.000885258
2008.46	52.9328	0.500663	51.9232	0.909433	1.0604	0.000500663	1.05939	0.000909433
2008.54	52.5469	0.506152	52.2418	0.81153	1.06003	0.000506152	1.05972	0.00081153
2008.62	52.1831	0.509042	52.6709	0.760474	1.05967	0.000509042	1.06016	0.000760474
2008.71	51.8422	0.509486	52.6085	0.869224	1.05934	0.000509486	1.06011	0.000869224
2008.79	51.524	0.507081	51.8592	1.02065	1.05903	0.000507081	1.05937	0.00102065
2008.88	51.2289	0.501401	50.8226	1.1552	1.05874	0.000501401	1.05833	0.0011552
2008.96	50.9556	0.491992	50.16	1.21731	1.05848	0.000491992	1.05768	0.00121731
2009.04	50.703	0.478821	50.2766	1.13904	1.05823	0.000478821	1.0578	0.00113904
2009.12	50.4714	0.462586	51.0093	0.958446	1.05801	0.000462586	1.05855	0.000958446
2009.21	50.2608	0.445489	51.7167	0.793514	1.05781	0.000445489	1.05928	0.000793514
2009.29	50.0713	0.430659	51.7027	0.686095	1.05763	0.000430659	1.05927	0.000686095
2009.38	49.9044	0.422711	50.7464	0.586882	1.05747	0.000422711	1.05832	0.000586882
2009.46	49.7615	0.426216	49.374	0.53747	1.05734	0.000426216	1.05695	0.00053747
2009.54	49.6431	0.443819	48.5555	0.640836	1.05723	0.000443819	1.05613	0.000640836
2009.62	49.55	0.475478	48.9221	0.795524	1.05715	0.000475478	1.05651	0.000795524
2009.71	49.4813	0.517831	50.1166	0.850601	1.05709	0.000517831	1.05773	0.000850601
2009.79	49.4343	0.566015	50.9787	0.769936	1.05705	0.000566015	1.05861	0.000769936
2009.88	49.4047	0.614993	50.523	0.759277	1.05703	0.000614993	1.05816	0.000759277
2009.96	49.3857	0.659767	48.8594	1.06431	1.05702	0.000659767	1.05649	0.00106431
2010.04	49.3683	0.696683	47.1201	1.39457	1.05702	0.000696683	1.05475	0.00139457
2010.12	49.3415	0.72268	46.4575	1.48047	1.057	0.00072268	1.0541	0.00148047
2010.21	49.2927	0.736024	47.0519	1.33029	1.05696	0.000736024	1.05471	0.00133029
2010.29	49.208	0.735817	48.1043	1.07948	1.05689	0.000735817	1.05578	0.00107948
2010.38	49.074	0.722242	48.7033	0.967988	1.05676	0.000722242	1.05639	0.000967988
2010.46	48.8775	0.696499	48.6693	1.20529	1.05658	0.000696499	1.05637	0.00120529
2010.54	48.6068	0.660773	48.5569	1.44741	1.05631	0.000660773	1.05626	0.00144741
2010.62	48.2539	0.618514	48.9357	1.38039	1.05597	0.000618514	1.05666	0.00138039
2010.71	47.8132	0.573791	49.7233	1.07596	1.05554	0.000573791	1.05746	0.00107596
2010.79	47.2826	0.531859	50.2148	0.823698	1.05501	0.000531859	1.05797	0.000823698
2010.88	46.6662	0.498383	49.7139	0.745844	1.0544	0.000498383	1.05747	0.000745844
2010.96	45.9704	0.478268	48.1354	0.724361	1.05371	0.000478268	1.05589	0.000724361
2011.04	45.2057	0.474308	46.0199	0.780411	1.05295	0.000474308	1.05377	0.000780411
2011.12	44.3882	0.485545	44.0307	0.915315	1.05214	0.000485545	1.05178	0.000915315
2011.21	43.534	0.508163	42.427	0.99513	1.05129	0.000508163	1.05017	0.00099513
2011.29	42.6612	0.536733	41.0465	1.00927	1.05042	0.000536733	1.04879	0.00100927
2011.38	41.7911	0.566188	39.7235	1.03255	1.04955	0.000566188	1.04747	0.00103255
2011.46	40.9415	0.592295	38.6269	1.05288	1.04871	0.000592295	1.04638	0.00105288
2011.54	40.1289	0.612236	38.1288	1.06342	1.0479	0.000612236	1.04589	0.00106342
2011.62	39.3703	0.624381	38.33	1.10351	1.04715	0.000624381	1.0461	0.00110351
2011.71	38.6764	0.628283	38.808	1.18656	1.04646	0.000628283	1.04659	0.00118656
2011.79	38.055	0.624221	38.9441	1.28023	1.04584	0.000624221	1.04674	0.00128023
2011.88	37.5117	0.61362	38.51	1.30863	1.04531	0.00061362	1.04631	0.00130863
2011.96	37.0466	0.598255	37.8697	1.26484	1.04485	0.000598255	1.04568	0.00126484
2012.04	36.656	0.580489	37.5379	1.21695	1.04447	0.000580489	1.04535	0.00121695
2012.12	36.3345	0.562781	37.5752	1.19281	1.04415	0.000562781	1.0454	0.00119281
2012.21	36.0725	0.547373	37.5002	1.23771	1.0439	0.000547373	1.04534	0.00123771
2012.29	35.8586	0.535573	36.8367	1.31356	1.04369	0.000535573	1.04468	0.00131356
2012.38	35.6802	0.528119	35.6863	1.21429	1.04352	0.000528119	1.04353	0.00121429
2012.46	35.5239	0.524402	34.672	0.948579	1.04338	0.000524402	1.04252	0.000948579
2012.54	35.3753	0.523391	34.3179	0.885109	1.04324	0.000523391	1.04217	0.000885109
2012.62	35.2214	0.523694	34.5394	0.988399	1.04309	0.000523694	1.04241	0.000988399
2012.71	35.05	0.523999	34.7813	0.923296	1.04293	0.000523999	1.04266	0.000923296
2012.79	34.8495	0.523228	34.6243	0.819361	1.04274	0.000523228	1.04251	0.000819361
2012.88	34.612	0.521293	34.1874	0.908221	1.04251	0.000521293	1.04208	0.000908221
2012.96	34.3302	0.518306	33.93	1.00706	1.04224	0.000518306	1.04183	0.00100706
2013.04	33.9998	0.514654	34.1147	0.949286	1.04191	0.000514654	1.04203	0.000949286
2013.12	33.6201	0.511295	34.5008	0.790577	1.04154	0.000511295	1.04243	0.000790577
2013.21	33.1925	0.508729	34.5461	0.715615	1.04112	0.000508729	1.04249	0.000715615
2013.29	32.7203	0.507374	33.8837	0.773493	1.04066	0.000507374	1.04183	0.000773493
2013.38	32.2114	0.507445	32.6513	0.850438	1.04015	0.000507445	1.0406	0.000850438
2013.46	31.6741	0.508806	31.4013	0.987811	1.03962	0.000508806	1.03935	0.000987811
2013.54	31.1182	0.511057	30.6708	1.16345	1.03907	0.000511057	1.03862	0.00116345
2013.62	30.5562	0.51433	30.5231	1.169	1.03852	0.00051433	1.03848	0.001169
2013.71	29.9992	0.51826	30.4456	0.974969	1.03797	0.00051826	1.03842	0.000974969
2013.79	29.4573	0.522909	29.7982	0.919555	1.03743	0.000522909	1.03778	0.000919555
2013.88	28.9413	0.528428	28.4865	1.1357	1.03692	0.000528428	1.03646	0.0011357
2013.96	28.4577	0.534852	27.1807	1.30429	1.03645	0.000534852	1.03516	0.00130429
2014.04	28.01	0.542304	26.7267	1.32318	1.036	0.000542304	1.03471	0.00132318
2014.12	27.6004	0.550804	27.2307	1.23485	1.0356	0.000550804	1.03523	0.00123485
2014.21	27.2253	0.560499	27.7966	1.07982	1.03523	0.000560499	1.03581	0.00107982
2014.29	26.8782	0.571746	27.3394	0.972518	1.0349	0.000571746	1.03536	0.000972518
2014.38	26.5502	0.585376	25.7165	1.0333	1.03458	0.000585376	1.03373	0.0010333
2014.46	26.2293	0.602259	23.9751	1.14356	1.03426	0.000602259	1.03199	0.00114356
2014.54	25.9012	0.623853	23.3906	1.12902	1.03394	0.000623853	1.03141	0.00112902
2014.62	25.5527	0.651052	24.2392	1.00413	1.0336	0.000651052	1.03228	0.00100413
2014.71	25.1702	0.684883	25.5387	0.917581	1.03323	0.000684883	1.0336	0.000917581
2014.79	24.7416	0.725713	26.0065	0.891462	1.0328	0.000725713	1.03408	0.000891462
2014.88	24.2596	0.7728	25.2423	0.877055	1.03233	0.0007728	1.03332	0.000877055
2014.96	23.7193	0.825264	25.1722	0.437427	1.03179	0.000825264	1.03326	0.000437427
