# Supplementary material for: Sixty years of radiocarbon dioxide measurements at Wellington, New Zealand 1954–2014
Source: Copernicus journal article supplement (doi:10.5194/acp-2016-1110), 2016-12-20
Supplement: Supplementary file [file acp-2016-1110-AC1-supplement.pdf]

Dear Editor,

We thank the three reviewers for their thoughtful reviews and respond to each point individually below, as well as making changes in the revised manuscript. First, we make three general points, and then respond to each reviewer comment (reviewer comments in bold, our responses in plain text).

1. We asked for additional time to revise the paper to address a key suggestion of reviewer 1, that is, to use a box model to help explain the observed seasonal cycle. Ultimately, we have not included the box model analysis in the paper for the following reasons. As several previous authors (Randerson et al., 2002; Levin et al., 2010) have pointed out, it is difficult to reproduce the  $^{14}\text{C}$  bomb spike, seasonal cycle and rate of decline with a simple 4 box model (Northern and Southern Hemispheres, each divided into troposphere and stratosphere). They were right, and we were unable to match the bomb spike peak, timing or interhemispheric offset unless we adjust the transport and flux terms to such an extent that we do not believe it is justifiable to interpret the results in a meaningful way. (For example, to match the maximum bomb peak amplitude in the Northern troposphere, we needed either an unrealistically fast stratosphere-troposphere exchange rate of less than one year or to place 20% of the bomb  $^{14}\text{C}$  in the Northern troposphere (rather than stratosphere)). We considered building a more elaborate box model, but concluded that our existing capabilities make it more realistic for us to focus on including  $^{14}\text{C}$  a higher resolution global atmospheric transport model for a future publication. Thus, we have substantially revised the discussion around the seasonal cycle to address the reviewer comments and remove sections that are speculative, and we have not included box modelling.
2. Reviewer 2 suggests that there is not sufficient new information or interpretation in the paper to warrant publication in ACP. We respectfully disagree. First, both reviewers 1 and 3 recommend publication with revisions. Second, the Wellington  $^{14}\text{CO}_2$  record is the longest direct atmospheric record of any trace gas or isotope anywhere in the world, and is the only long-term Southern Hemisphere  $^{14}\text{CO}_2$  record. It has been used widely and will no doubt continue to be used widely (previous reports on the Wellington record have been directly cited 138 times (Currie et al 2011, Manning et al 1990) and the dataset is the main Southern Hemisphere record used in compiled  $^{14}\text{C}$  global records that have been cited more than 500 times (e.g. Hua and Barbetti 2013, Hua et al 2004)). As such, we believe this continues to be an important record that should be widely discoverable, and ACP is a suitable place for it.
3. Reviewer 2 also asks for a shortening of interpretation that is repeated from previous publications. We understand the reviewer's point of view, but we believe that when reporting on a long record, it is frustrating to the reader to have to refer to previous publications to find interpretation of the long record. We have altered the text to make clear where interpretation has been reported elsewhere and where it is new.

#### **Reviewer 1 Samuel Hammer**

**Turnbull et al. present a thorough revisit of the entire Wellington atmospheric  $^{14}\text{CO}_2$  record. They re-measured archived samples and include new information from tree samples to better investigate known "noisy" periods of original record. Conceivable flagging criteria are formulated and the Wellington record is compared to independent**

data sets. Therefore, this manuscript is of utmost scientific interest to the radiocarbon community and I definitely recommend publication in ACP.

In addition to the data review the authors revisit and extend the key findings that the Wellington  $^{14}\text{CO}_2$  record provides. For some of the conclusions drawn from the data I would like to ask the authors to reinforce their arguments to overcome my minor concerns.

**General comments to the authors:**

**$^{14}\text{C}$  measurements:**

**Have you investigated if the use of IRMS- $^{13}\text{C}$  in the early AMS measurements introduces a bias? Such a potential bias could originate e.g. from a machine immanent fractionation. I assume you have IRMS- $^{13}\text{C}$  measurements also for the post-2005 samples. Did you compare the effect of offline and online  $^{13}\text{C}$  measurements for the D $^{14}\text{C}$  normalization directly? Such an investigation will also quantify the contribution to the scatter which is due to offline  $^{13}\text{C}$  analysis in the earlier AMS results.**

Yes, of course. We believe that indeed the use of IRMS- $^{13}\text{C}$  measurements in the 1995-2005 AMS analyses is the reason for the variability. The very clear reduction in noise from 2005 when online AMS  $^{13}\text{C}$  analysis was added is very convincing evidence, and there is ample evidence from many AMS labs that this is likely the explanation. This is discussed in two places (sections 3.3 and 3.5.3). We have expanded the text and pointed the reader to the other section in the discussion.

**Smooth curve fit:**

**Fitting section by section may introduce problems at each overlap of the sections.**

**Wouldn't it be better to use a fit routine which can deal with a changing phase? Pickers et al. mention that STL per se does not require gap filling, only the current implementation of STL does. Pickers et al. also investigate HPspline which would allow for a change in phase. Why didn't you chose this fitting algorithm?**

We did consider using other algorithms, particularly STL, since this was used in previous analysis of the Wellington  $^{14}\text{CO}_2$  record. Pickers et al showed that of the three, HPspline was least able to capture the seasonal cycle of atmospheric records and therefore we did not consider it further.

We agree that the STL technique has the advantage of allowing flexibility in the shape of the seasonal cycle. Instead, this approach assumes that the seasonal cycle and trend vary only slowly over a defined time window. This assumption is problematic for time-series characterized by rapid or abrupt changes, such as radiocarbon. During the bomb peak, the seasonal cycle is dramatically amplified, and it falls off rapidly in the years that follow. When STL is applied to this time-series, the seasonal amplitude is damped during the bomb peak and amplified in the years that follow compared to observations. Likewise, the bomb peak is damped and delayed in the STL estimate of the trend. This can be partially ameliorated by dividing the time-series into sections, but this then leads to the same kinds of overlap issues that you have highlighted as problematic for CCGCRV.

In addition, we found that the gap filling needed in STL was as problematic for this record as the phase problem in CCGCRV – neither is a perfect choice. We take the reviewer's point that STL doesn't necessarily require gap filling, but this would require an entirely new fitting

system that is not currently used in the atmospheric community and would therefore raise a number of questions of its own. Further, the seasonal cycle is quite small after 1979, and the majority of users of this dataset are interested in the annual trend, so overall, we judged that the phasing problem in CCGCRV is less problematic than the gap filling problem of STL. We have made some adjustments in the text to clarify these points, but note that we chose not to explicitly discuss HPspline at all since its limitations have been discussed elsewhere already.

**When you investigate the phase change in the  $^{14}\text{CO}_2$  signal, you find that the seasonal cycle weakens between 1978 and 1980, and then reverses. Could it be that this timing is related to the change in the fitting sections (1966-1979 and 1980 to 1989). The described method for overlap and interpolation between different fits favors the weakening of the seasonal cycle at the section borders if both sections are out of phase. I wonder if you would find the same timing for the phase change if you chose different fitting sections...**

In fact, we chose the division at 1979-1980 precisely because the change in seasonal cycle is apparent in the raw observational data at this time period. We tested other divisions into time periods and found that the fitted curve couldn't match the data as well, as diagnosed by the residuals. We have added text to explain our choices.

**Hypothesis of reversed seasonal cycles in the early post-bomb era:**

**The hypothesis behind the changing phase in the seasonal cycle should be backed up by a small (box-) model exercise. This model should include the seasonal cycles of the STE (in NH and SH) and the CEE (cross equator exchange) in the troposphere and the stratosphere. The Mount Pinatubo eruption is a well-studied phenomenon when it comes to stratospheric transport. see e.g. Aquila et al. 2012. They find middle- stratospheric meridional pathways with mixing times of less than a year. The major stratospheric bomb-peak lasted for about 4-5 years (see HASL data compiled in Naegler et al 2006). Can you show in a (box-) model that with those boundary conditions your hypothesis is valid?**

**Aquila, Valentina, et al. "Dispersion of the volcanic sulfate cloud from a Mount Pinatubo-like eruption." *Journal of Geophysical Research: Atmospheres* 117.D6 (2012).**

Please see our general comment to the editor – we spent considerable effort developing a box model, but ultimately demonstrated for ourselves what previous authors had already shown –  $^{14}\text{CO}_2$  can't be adequately described with a four box model. Instead we have revised our discussion of the seasonal cycles to take on the reviewer comments and utilize previous modelling studies. We have considerably reduced the discussion of the seasonal cycle since the reviewers point out that we don't have sufficient evidence to back it up.

**Interpretation of the seasonal cycles since 2005:**

**I have a couple of questions and comments to the comparison of the Wellington and Cape Grim seasonal cycles:**

**The comparison to the Cape Grim seasonal cycle is problematic since both mean cycles do not average the same time period. Figure 4b shows that there are obvious large inter-annual variations in the amplitude (phasing?) of the seasonal cycle.**

We added a comment that choosing only the period of overlap (2005-2010) gives similar results.

**What is the origin of the double maxima in the BHD cycle?**

We revised the discussion to make our argument clearer that this is due to transport and STE.

**Is the Melbourne influence at Cape Grim detectable in CO<sub>2</sub> or CO?**

Yes (in the reference provided) – but the in situ and flask data can be screened to remove the local influences, whereas the <sup>14</sup>C samples, which reflect the integrated <sup>14</sup>C signal over ~two weeks, cannot. Text revised to reflect this point.

**Fig 6 does not convince me that BHD is not influenced by anthropogenic emissions. Wellington is in the middle of the “red” area. When reading Pickers et al. they mention that in their data example of the BHD CO<sub>2</sub> data they had to gap fill 10% of the data since they deviated from baseline conditions.... To me this indicates some anthropogenic influence at BHD as well.**

We expanded the discussion of influences at Baring Head, using the CO<sub>2</sub> observations of Stephens et al (2013) to show that there is a very occasional urban influence, and a more regular terrestrial biosphere influence, but there is no evidence of seasonality in either of these (i.e. they might influence the overall  $\Delta^{14}\text{CO}_2$  value very slightly, but not the seasonal cycle).

**Sure, Melbourne emits 50 times more ffCO<sub>2</sub> than Wellington, however the distance between Melbourne and Cape Grim is 340km, whereas it is around 10km between Wellington and the BHD...**

We revised the text as in the response above.

**If STE is the driving mechanism for the seasonal cycle for the periods 1966 to 1979 and 1980 to 1990, how come that the seasonal cycle post 2005, which is also explained via the STE, is not in phase with the earlier once...**

We have removed this argument since the reviewers have pointed out that we don't have sufficient evidence to back it up.

**Specific comments:**

**p.2 l.40 Please state the years when the measurements in Norway and Austria started**  
Done.

**p2. l.44 The term “exchanges” is a bit too general, consider oxidized or something more specific.**

Revised. See also reviewer 3 response.

**p.2 l.45: Production -> Natural production**

Revised.

**p2. l 47: perturbations to  $\Delta^{14}\text{CO}_2$  -> perturbations to natural  $\Delta^{14}\text{CO}_2$  levels**

We considered this, but on rereading the text, believe that “perturbations to  $\Delta^{14}\text{CO}_2$ ” more accurately reflects the point we are trying to convey. In recent years, the fossil fuel perturbation is of great interest, but it is the perturbation relative to the recent atmosphere that we are primarily interested in, not the perturbation relative to natural levels.

**p2. L62: Add year to Lopez et al., and add also early attempts of ffCO<sub>2</sub> emission estimates like e.g:**

*Meijer, H. A. J., et al. "Isotopic characterisation of anthropogenic CO<sub>2</sub> emissions using isotopic and radiocarbon analysis." Physics and Chemistry of the Earth 21.5 (1996): 483-487.*

*Gamnitzer, U., U. Karstens, B. Kromer, R. E. M. Neubert, H. A. J. Meijer, H. Schroeder, and I. Levin (2006), Carbon monoxide: A quantitative tracer for fossil fuel CO<sub>2</sub>? J. Geophys. Res., 111, D22302*

We added the year to Lopez et al., and added the Meijer paper. There is now a long list of papers that use <sup>14</sup>C to understand fossil fuel emissions, and it does not seem appropriate to cite every one of them here. Instead, we tried to list only the key papers describing the method and one from each "scale" of study. We should most definitely include the Meijer et al paper, but the Gamnitzer paper doesn't add much beyond the seminal Levin 2003 paper (at least in this context).

**p.2 I77: add citations to the last part of this paragraph**

Done.

**p4 I128: what do you intend with the term "nominally CO<sub>2</sub>-free"? Did you process blank NaOH solutions? How much CO<sub>2</sub> is in a blank NaOH solution? What is the 14C activity of this blank?**

This is in the supplementary material section S3.1 and we added a pointer to that section in the main text.

**p4.I131: "large tray" can you state the surface area of that tray?**

Added in the supplementary materials.

**P4.139: Please add the statement about fractionation (supplement S3.I90-92) to the main text.**

Done.

**P5 I189 "one" sd? In Fig S2 and the text you state 2 sd?**

We have slightly altered the statistical analysis to include a paired sample t test and reworded in both the main text and supplement figure S2 caption to clarify that there is no significant difference between the two methods.

**P6 I259 please include a reference to Fig.2 in this subsection**

Done.

**P8 I316 I don't see the 2005 EN Tandem improvement mentioned in Zondervan et al 2015.... Maybe I overlooked it?**

The method for using all three isotopes measured in the AMS is described in Zondervan et al 2015. We moved the reference to the previous sentence to clarify that it applies to the method, not the improvement in precision.

**P8 I336 Do the measurements from this period carry a special flag (e.g noisy) in the dataset? Reading the supplement I found that you are already doing this. Maybe make a short note in the main text.**

Done.

**P8 I353 how does ccgvu handle data gaps and inconsistent sampling frequencies? Since the paper is (at least for me) not freely available it is worth mentioning this shortly in the supplement.**

Done.

**P9 I362 what is the unit of the cutoff criteria in the frequency domain?**

Days. This was a typo.

**P9 I363 is the 2 year overlap a good idea? In terms of transition yes, but don't you have now the influence of end-effects in 4 years?**

We tested using different overlap periods. Using a shorter overlap causes a nasty end effect jump in the record, and a period that is much longer smooths out the differences too much. We added a comment to justify our choice.

**P9 I368 "mean residual difference" do you mean RMS of the residuals**

No, this is the mean of the residuals, which are the mean difference between the smooth curve fit and the measured values. We reworded "mean residual difference" to "mean difference", which we think makes this clearer.

**P9 I379 state the "n" of the MC**

Done.

**P9 I382 where are the 95% conf intervals given? In the data set I see only one uncertainty column, please specify in the data-set if this is the 1 sigma error or the 95% conf interval.**

We have removed the 95% confidence interval – we had originally included this in the reported dataset, but since it is effectively multiplying the one-sigma uncertainty by two, it seems unnecessary to include it in the final dataset.

**P9 I384ff the model simulation are not convincingly not used in the paper. See general comments. Consider skipping the subsection 3.7 and Fig 6.**

On lines 479-481 of our original manuscript, we describe the finding of Ziehn et al. [2014] that Cape Grim is influenced by fossil fuel emissions from Melbourne in the wintertime. Ziehn et al show that this seasonal fossil emission influence is primarily driven by seasonal changes in atmospheric transport, rather than seasonality in the fossil fuel emissions. We present the seasonal analysis of our model simulations to demonstrate that Baring Head is not influenced by seasonal transport variability. We have clarified the text in this section.

**P9 I388 LAU ??**

Removed – this was an oversight as the model also generates footprints for the Lauder site (LAU) that are not discussed in this paper.

**P10 I403ff include ref to fig. 2**

Done.

**P10 I442 30 per mil amplitude for the period 1966-1979? I only see such an amplitude once? A mean amplitude of ca. 7 per mil seem more realistic.**

We revised the text to clarify that 30‰ is the maximum amplitude and a mean across this period of 6 ‰.

**P11 I456 fig 6 -> fig 5??**

Removed this figure reference.

**P11 I459 “Between 1978 and 1980 the seasonal cycle weakened”. This is not really seen in fig 4b.**

**Unfortunately 1978 to 1980 is a boundary of the fitting sections... since the seasonal cycles for the two sections are opposed and the overlap is linearly interpolate between fits... a weakening can also come from the applied method.**

In figure 4b, we added the detrended raw observations and expanded the text.

**P11 I460 5 per mil amplitude? Maybe two times in this period... 3 per mil on average**

Revised. (we had used peak to peak amplitudes and have revised to use middle-to-peak amplitudes as is more standard).

**P11 I467 fig 5 -> fig 4**

We intended to refer to figure 5. No change.

**P12 I494 fig5 -> fig 4?**

We intended to refer to figure 5. No change.

**P12 I497 “records that are indicated in figure 1” -> “records where the sampling locations are indicated in figure 1”**

Revised.

**P13 I563 Model results from Levin et al. 2010 already suggest the development of a interhemispheric gradient in the same magnitude for the same time... without changing the southern ocean... although they admit that they are not matching the data...**

Levin et al. (2010) were the first to suggest the development of an interhemispheric gradient, and we were remiss in our discussion of this. It has been rectified in the revised manuscript. Levin et al. were able to roughly match the observed gradient without changing the Southern Ocean. It is important to note that Levin et al. tuned the terrestrial biosphere component of their model to match the observed global average atmospheric CO<sub>2</sub> and Δ<sup>14</sup>CO<sub>2</sub>. Thus, this paper highlights the fact that a terrestrial process occurring predominantly in the Northern Hemisphere can reproduce the observed gradient, but we do not feel that it proves the gradient was caused by the terrestrial biosphere or rules out a major role for the Southern Ocean.

We have almost entirely re-written this section of the paper to present a more balanced view of the potential processes controlling the gradient. We still feel that a re-organization

of the Southern Ocean is the most likely cause given the supporting evidence from the ocean carbon cycle community. However, we now more clearly acknowledge the previous interpretation of Levin et al. and the fact that we cannot robustly distinguish between a terrestrial and oceanic cause with the existing sparse radiocarbon network.

**Table1: include sample no. to NZ/NZA, replace GC with gas counting, change “measurement methods” to “measurement and sampling methods”**

We made these changes and added more text to the caption to clarify.

**Table2: provide the unit to the 14C differences**

Done.

**Figure1: provide scales to the google earth pictures, indicate urban areas in the upper map.**

Done.

**Figure 2. consider vertical grid lines to illustrate the different periods used in the paper.**

We tried this but found that it cluttered the graph too much.

**Figure 2. Consider indicating graphs with a) and b)**

We think (top) and (bottom) are appropriate here since it is quite obvious what is shown.

**Figure 2. x-label of graph a) is cropped...**

This looks fine in our version. If the problem still appears in the proofs, we will correct it.

**Figure 4. Consider indicating graphs with a) and b)**

We are happy with using top and bottom.

**Figure 4. in a) use the same periods as in the text.**

This was a labelling error and has been corrected.

**Figure 4. b) consider vertical grid lines to illustrate the different periods**

That would be nice, but once we added the detrended observations, adding vertical lines was just too confusing.

**Figure 6. Motivate the plot better. Not really used in the paper. Explain the unit.**

The unit is now more clearly explained, but we chose to keep this figure for reasons outlined above.

**Figure 7. Consider indicating graphs with a) and b)**

As before, we are happy with using top and bottom.

**Figure 7. Consider usage of open symbols. Especially after 2000 it would be good to see all data.**

We tried a number of different ways of presenting this – smaller symbols are hard to see, and open symbols also make it hard to look at. The version we show gave (at least in our opinion) the best presentation of the comparison.



**Supplement:**

**S2.I74 state the surface area of the pyrex tray**

Added.

**extraction follows -> extraction from 1995 onward follows**

Changed.

**in total after flagging you have 427 targets, if you split them between the machines you have 397 and 102 .... To me this does not add up? What am I missing?**

A mistake on our part – we initially recorded the degrees of freedom in each  $\chi^2_v$  calculation rather than the number of targets (degrees of freedom = number of targets – number of unique samples). We have rectified this to give the number of targets.

**Please state the main offset for the QC datasets between the two AMS machines.**

We expanded this sentence to say that no offset was observed.

**S5 I217ff What is RLIMS?**

RLIMS is defined in line 36 of the supplement, it is the name of our radiocarbon laboratory database. We added a reminder at this point in the document since the reader might not recall.

**S6. L262 Indicate the figure S1 with a) and b). I assume a) is Eastbourne and b) is Baring Head? Correct?**

We revised the caption – a is the full record and b is zoomed into the recent time period.

**S9 I394 Since you cannot decide between “red” or “green” for the Baring Head tree, how can you than state the excellent agreement? Is it excellent for both red and green? Please include a link to the t-test or the mean difference to reinforce this statement.**

See above comment – the different colors indicate where we shifted the ring counts by + or – one year NOT different trees. The bottom graph is simply a zoom of the top one. We revised the caption to make this clearer.

**S12.I457 Define “NIK”. Why is there only one comparison for NIK and 4 comparisons for BHD?**

NIK has been changed to “Eastbourne” (NIK is the short name for the street the trees are located on). Most of the Eastbourne samples are from a single tree, and the comparison between the two trees does not appear to be critical (hence only one comparison). The key comparison is between the BHD and Eastbourne trees, which show no significant differences between  $\Delta^{14}\text{CO}_2$  at the two locations.

**S12.I468 please specify the t-test: I assume you use a dependent t-test for paired samples? Since the applied formulas are easy it might be clearer if you just explicitly state them.**

Revised the caption.

**what is the mean difference if you use the one year shifted BHD tree (red points in fig S1)?**

Shifting the BHD tree one year older gives a mean difference between the BHD and Eastbourne tree rings of  $5.6 \pm 0.7$  ‰ and a paired sample t value of 8. Conversely, shifting one year younger gives a mean difference of  $-8.4 \pm 0.8$  ‰ and t of 11. Either shift indicates a poor match and therefore unlikely. We added some text to describe this.

**Technical comments:**

**In the text please use a consistent ordering (e.g. temporally ascending) when citing multiple papers.**

Done.

**Reviewer 2:**

**The atmospheric radiocarbon measurements conducted at Wellington are a very important record and the authors' efforts to maintain and evaluate the observations are valuable to the community.**

**However, there are some major revisions needed before publication of this manuscript. Much of the paper is used on re-reporting trends and gradients that have already been shown in other work. The authors also make unsupported claims about the mechanisms driving the interhemispheric gradient and seasonal cycles of D14C.**

**The paper postulates a sensitivity to Southern Ocean air-sea exchanges that is misleading and unsupported. It gives the impression that the Southern Ocean only began influencing the interhemispheric D14C gradient in 2002, whereas the Southern Ocean has always been a primary influence on the interhemispheric D14C gradient, via gross, not net, carbon exchange. Levin et al. 2010 and Randerson 2002 clearly show that the observed trend in the interhemispheric D14C gradient is consistent with a long-term change in the oceanic influence, dominated by the long-term decrease in atmospheric D14C and the change in D14C disequilibrium over the Southern Ocean, which is further supported by the Graven 2012 papers.**

**A change in upwelling is interesting to consider as a secondary effect, but the authors do not include quantitative models or estimates of how large the effect could be, nor any specifics on how it influences D14C. Furthermore, the Wellington data from 1995-2005 are shown to have serious issues, which would complicate identification of a signal originating in the early 2000s. And there is no discussion about the period in the 1990s when upwelling was increasing.**

We agree with the reviewer that ocean disequilibrium has been important throughout the post-bomb  $^{14}\text{C}$  record, and our text was intended to convey that point, and that there is a possibility of a change in upwelling that could change the magnitude of this effect. Based on this and comments from the other reviewers, we have reduced the discussion of the possible change in upwelling, and tried to emphasize that indeed ocean exchange has always been important.

**The authors similarly make statements about the influences on the seasonal cycle of D14C at Wellington that aren't well-supported.**

Based on this and the other reviewer's comments, we have shortened the seasonal cycle discussion.

**The paper should be shortened to minimize the re-reporting of previous observations, reduce repetition, clarify the long-term trend in the Southern Ocean influence on the interhemispheric D14C gradient, and remove unsupported statements. As the main contribution is to revise the Wellington data, i.e. no new modeling or other evidence is given to help interpret the data, the paper might be better suited to a journal like Radiocarbon or Atmospheric Measurement Techniques.**

We appreciate the reviewer's view that this work could be well suited to Radiocarbon or AMT. We do believe that the uniqueness of the record, its length and wide use across a large audience makes this worthy of publication in ACP.

#### **Specific Comments.**

**Section 3.5.3 appears to show major problems in the measurements for the 1995- 2005 period, with large scatter and a high bias. I don't agree that the questionable data should be retained, as the authors have done - "in the absence of better data, we retain both the original and remeasured NaOH sample results in the full record." This conflicts with the aim of the paper to evaluate and refine the previously reported measurements and, presumably, to prevent the interpretation of measurement problems as real atmospheric variability.**

We believe that it is appropriate to report these results in the observational dataset, rather than simply discarding them from the published record, since we cannot definitively say that they are wrong. We have flagged them clearly in the dataset, and users have the opportunity to use them or discard them. Further, we provide two different fitted curves – one including this data and the other removing it and replacing with Cape Grim data. We have added text to clarify these points.

**The code WLG is already used by NOAA for Mt Waliguan, China – perhaps another code would be better.**

We have changed the code to BHD, and the actual site (Makara or Baring Head) is still indicated in the data files.

#### **L15 Earliest direct atmospheric**

Changed.

#### **L98 Revisiting key findings can be placed in the introduction for brevity.**

We believe that the paper is easier to read with the current organization.

#### **L104-108 Unsupported. See above comment.**

We removed these sentences from the introduction and shortened the discussion in the results/discussion section.

#### **L234 Please quote a value for precision**

Added.

#### **L306 Why would this result in higher D14CO2?**

Revised to "This would result in contaminating CO<sub>2</sub> absorbed on the NaOH before the solution was prepared. Since atmospheric  $\Delta^{14}\text{CO}_2$  is declining, this would result in higher  $\Delta^{14}\text{CO}_2$  observed in these samples than in the ambient air. "

**L378 More detail needed. Where is this used?**

We added the following sentence to clarify why this is included: “This is provided for further users of the dataset, and may be particularly helpful when the dataset is used for aging of recent materials.”

**L384 How do 4-day back trajectories address the seasonal cycle? The panels in the figure all look the same. This is not very useful. A panel should be shown with the differences if there is a difference to highlight.**

Ziehn et al. (2014) show that the Cape Grim site is influenced by seasonally coherent changes in the atmospheric transport, such that the site detects fossil fuel emissions from Melbourne in winter but not in other seasons. We show these model simulations precisely to demonstrate that the Baring Head record is not influenced by such seasonal variations in transport. In response to this comment and a similar comment by the first reviewer, we have rewritten and clarified this discussion in the manuscript.

**L413 Since 2005 or earlier?**

Changed “since” to “after” to clarify.

**Section 4.1 seems out of place and repetitive. Should move to introduction and focus on new results here.**

We believe that the paper reads more clearly with this discussion here.

**L435 Turnbull 2009 only includes simulations from the 2000s, so they do not show the Suess Effect became the dominant driver in the 1990s.**

We included references to the two studies that have shown that the Suess Effect is the most important driver after 1990. Levin et al 2010 show this has occurred since 1990, Turnbull 2009 is a second study using an independent model that agrees with the Levin result. We believe it is appropriate to include both references.

**L454 Do you mean when mixing with lower-D14C air from the stratosphere was the strongest? Are there Southern Hemisphere stratospheric observations from the bomb period supporting the idea that tropospheric D14C was higher than stratospheric D14C? Are you saying that tropospheric D14C was higher than stratospheric D14C in the Southern Hemisphere until the late 1970s? Bomb 14C would have also entered the SH stratosphere through the tropical tropopause, while at the same time tropospheric D14C was declining, so this seems unlikely. Note Northern Hemisphere sites also showed minima in spring in the early bomb period. Levin 2010 simulate recent seasonal influences on D14C and should be cited here. Oceanic influences on the seasonal cycle should also be mentioned.**

We have revised this section to remove this discussion.

**L468 See Brenninkmeijer, C. A. M., Lowe, D. C., Manning, M. R., Sparks, R. J., & van Velthoven, P. F. J. (1995). The 13C, 14C, and 18O isotopic composition of CO, CH4, and CO2 in the higher southern latitudes lower stratosphere. Journal of Geophysical Research: Atmospheres, 100(D12), 26163-26172. doi:10.1029/95JD02528**

Thank you for this reference, but we have removed this discussion and therefore not included it.

**L494 This is the time of maximum in the NH so this phasing is unexpected. Is there an explanation for the double-peaked shape of the cycle? This section relies on dismissing the Cape Grim data, which is not entirely convincing. Are other Southern Hemisphere observations relevant here?**

There are no other long term records from a similar latitude in the Southern Hemisphere (there are tree ring records, but these clearly cannot resolve seasonal cycles). We expanded this discussion to strengthen our argument. It is worth noting that the seasonal cycle during this period is quite small and the difference between the seasonal cycle in the two records is perhaps 0.5‰.

**L517 It would be useful to include a plot of the difference between the Wellington and Cape Grim data.**

The two datasets are shown in figure 3 and we added a reference to figure 3 in this sentence.

**L521 Delete the word signal. Is it possible to say something more quantitative than "homogeneous"?**

In the previous sentence, we say that differences between the two sites are smaller than the measurement uncertainty.

**L527 What is the basis for the new estimate of the interhemispheric exchange time? How was this calculated? Without any supporting information this paragraph should be deleted.**

We have added further explanation of this calculation. It is surprising that this bomb peak difference has never actually been used to calculate an interhemispheric exchange time before. Although our calculation is simplistic, it agrees nicely with recent, more sophisticated analyses of the exchange time and we think it is worth including.

**L544 Need to cite Levin 2010, and Graven 2012**

Both are now cited in this paragraph.

**L561 Also shown in Randerson 2002 and Levin 2010**

We now include the Levin 2010 reference. Randerson 2002 doesn't go beyond 2000 in its data, so it is less relevant here.

**L565 This paragraph is misleading. See main comment above.**

We have shortened this section considerably.

**L575 This is the gross carbon flux not the net carbon flux. Atmospheric D14C has been highly sensitive to Southern Ocean upwelling not only since the 1980s but since the preindustrial period and throughout the bomb peak period – see Randerson 2002 and Levin 2010**

We agree with the reviewer, see earlier comments. And have shortened this section considerably.

**L593 “Although the changing Southern Ocean carbon sink is the most likely explanation,” Atmospheric  $\Delta^{14}\text{C}$  is not directly affected by the Southern Ocean carbon sink. What is the justification for this statement? See main comment above.**

See previous comments – shortened this section.

**Reviewer 3 J. Miller (Referee)**

**General comments.**

This paper documents and analyzes the longest atmospheric radiocarbon time series from a single site. Obtained near Wellington, New Zealand starting in 1954 and continuing to the present, these data represent a signature time series of carbon cycle science. The authors document the revision and evaluation of the data, which should lead to a significant improvement in its scientific utility. The seasonal cycle and trend are analyzed convincingly, although too much attention is paid to the hypothesis that an increased Southern Ocean  $\text{CO}_2$  sink can explain the changing  $\Delta^{14}\text{C}$  atmospheric north-south gradient. While it's true that the change in the north-south  $^{14}\text{C}$  gradient supports this idea, there is no new analysis of the time series to bolster it. One additional point is that it would be good to provide the internet location of the data in addition to the static spreadsheet provided. Presumably the ftp site would contain the data set of record including the latest data, flags, and corrections. Nonetheless, this is a strong paper that is entirely appropriate for ACP; it should be published after a few modifications.

The dataset is now available at the WDCCGG and our own websites and we have added a section 7 Data Availability at the end of the text with the links. We are working on also putting the data at CDIAC where much of the global  $^{14}\text{CO}_2$  data resides, but internal CDIAC issues have slowed this down.

**Below, I list some edits and comments by line number.**

**Specific comments.**

**L21,22. While Cape Grim air samples may contain anthropogenic signals in winter, air samples have often been collected during times when the wind is not coming from the north.**

This is not the case for  $^{14}\text{C}$  samples which are integrated over  $\sim 2$  weeks. We have clarified this key point in the text of our paper.

**L44. ‘exchanges’ is a bit vague. Why not spell it out to say that  $^{14}\text{C}$  reacts immediately with  $\text{O}_2$  to form  $^{14}\text{CO}$ , which is subsequently oxidized to  $^{14}\text{CO}_2$**

Done.

**L68-70. This is redundant with text around L44.**

The slight repetition seems necessary for the text to be clear. No changes made.

**L75. Perhaps strike 'now', and add 'in the two decades following the atm. test ban treaty' at the end of the sentence.**

Done.

**L77. I don't agree that the additions of fossil fuels became the dominant factor influencing the  $\Delta^{14}\text{C}$  trend. If fossil fuel  $\text{CO}_2$  additions are 'dominant' I would think of them being an order of magnitude or so larger than other processes. Presently (and more or less in the 1990s), fossil fuel combustion alone would reduce the atmospheric  $\Delta^{14}\text{C}$  by ~ 10 per mil/yr; cosmogenic production would increase it by 5 per mil/yr; the land- atmosphere and ocean-atmosphere disequilibrium fluxes would be roughly +4 and -4 per mil/yr. It might be reasonable to try and calculate a point at which the negative trend in atmospheric  $\Delta^{14}\text{C}$  was driven more by fossil fuel emissions than by absorption of bomb  $^{14}\text{C}$  atoms into the biosphere and oceans. But this would not equate to 'dominant' in my opinion.**

This is an important distinction, and we agree with your points. We have changed from "dominant" to "the largest contributor to the  $\Delta^{14}\text{CO}_2$  trend."

**L80. Change 'especial' to 'special'**

This is a New Zealand colloquialism. Changed to standard English.

**L129. Use 'M' (molar) or 'mol/L'**

Done.

**L158. 'Faithfully' record  $\Delta^{14}\text{C}$ , but not the  $^{14}\text{C}$  content, which is offset by ~ 34 per mil.**

Corrected from " $^{14}\text{C}$  content" to " $\Delta^{14}\text{C}$ "

**L210. Was testing done do see if the samples could be stored for up to three years before analysis without introducing artifacts.**

No such testing has been done, and this is something we will consider for future updates of the record. No changes made to the text.

**L216-218. Could using an offline  $\delta^{13}\text{C}$  value produce bias or just add noise? Any tests to examine this?**

Yes, this is possible, even likely. We have not done specific tests, but fractionation during sample preparation will almost certainly always go in the same direction. The most likely culprit is incomplete graphitization (in the LG1 graphite system used at this time, reaction completion was not directly measured and we suspect that graphitization was often incomplete), which fractionates to the lighter isotopes and if not diagnosed would result in a higher  $\Delta^{14}\text{C}$  (i.e. goes in the direction of the apparent bias in the data). On the other hand, fractionation in the AMS (most likely in the ion source) is likely to vary in sign through time. We have added explanation in sections 3.3 and 3.5.3 to explain this more clearly.

**L227. Considering that the multi-target averaging resulted in differences of up to 5 per mil, I think that this deserves a detailed explanation, at the very least in the supplement.**

We agree. An explanation was already given in the supplementary material and we have expanded it slightly and included a note in the main text pointing to the supplement for more information.

**L243. S+P's  $\Delta$  is the same as the presently used  $\Delta^{14}\text{C}$ ; their  $\Delta^{14}\text{C}$  is defined differently.**  
Reworded to clarify.

**L255. How was the weighting done? Inverse square of the measurement precision?**

Weighted mean as defined by Bevington and Robinson (2003).  $\text{Sum}(x_i * w_i) / \text{sum}(w_i)$ , where  $x_i$  is the mean of each measurement  $i$  and  $w_i$  is the weighting, defined  $1/w_i$ . Since measurement precision does vary, it is appropriate to use a weighted mean rather than a simple mean.

**L280. Wondering if 'excursion' is the best word here. Anomaly?**

Changed.

**L283. As mentioned in comments on L22, Cape Grim sampling can be 'tuned' just for a clean air sector. If the issue is integrated sampling, then I would say that.**

Point taken, but rereading this section, the sampling regime at Cape Grim is not germane in this paragraph (although it is relevant elsewhere in the manuscript). No changes made.

**L284. Change 'terrestrial' to 'mainland'?**

Done.

**L303-304. 'preparation was conducted' to 'was prepared'.**

Done.

**L313. 'or thereafter' to 'and thereafter'**

Done. We noticed that one even before the reviewer did.

**L325. I don't see the reduction of scatter shown in any plot. It would be useful to show how the reprocessing improved the noise.**

The data was not reprocessed, it is that once the change was made, the  $\Delta^{14}\text{CO}_2$  record immediately becomes less noisy. It is clearly apparent in figure 2b. We added some words in the text to point the reader to the figure.

**L351. Change 'ccgvu' to 'ccgrv' which is the actual name of the curve fitting code.**

Done.

**L362. Insert 'day' after 80. Good that this important detail was included.**

Done.

**L395. Add a sentence explaining what a footprint is.**

Done.

**L403. I think 'roughly "natural"' can be deleted; natural is ambiguous. Maybe 'roughly pre-industrial'?**

Done.

**L421-422. By 'long-term' to you mean decline since the 1960s? For many in the radiocarbon world, that wouldn't be very long, so maybe define the time period more explicitly. Also, insert 'known' prior to 'long-term trend in. . .'**

Revised.



**L434. As mentioned earlier, I don't think 'dominant' can be justified.**

Changed "dominant" to "largest"

**L469. I'm wondering about the value of an untestable hypothesis. What you say sounds plausible, but maybe refer to it as speculation?**

We have removed this argument based on reviewer skepticism.

**L507. Should Levin et al reference by 2010? 2013 paper appears to deal with Europe.**

This is correct in the text – we are referencing the method by which the Jungfrauoch (European) measurements are made.

**L527-534. I would like to see the math of how this was calculated, at least in the supplement. Also, one important factor is to know the state of ENSO during the 1963-1965 period, because La Nina, for example, can significantly increase inter-hemispheric exchange. Finally, the SF6 derived value is based purely on surface data, whereas the  $\Delta^{14}\text{C}$  method has a significant upper atmosphere component. It would be good to comment on how the estimates might differ.**

This is a very simple calculation – what is the temporal offset between the first maximum of the bomb peak in each hemisphere. We have revised the text to clarify how the calculation was done.

**L544 – 596. I felt that the text at the end of the Results and Discussion section focusing on the interhemispheric gradient and the Southern Ocean was a bit out of place. The Wellington  $\Delta^{14}\text{C}$  data confirm the gradient observed earlier and extend it in time. However, at present, the two paragraphs (starting at line 565) sound more like a review of the Southern Ocean uptake hypothesis, because there doesn't appear to be any new analysis. If it's not possible to add any new analysis using the Wellington data, I think it would be better to be very concise, essentially saying something like 'our data suggest the S.O sink continues to explain. . . Numerous recent studies using methods x, y and z further support. . . Our data set will be a powerful constraint to understanding the evolution of the gradient in a quantitative model framework. . .'**

We have reduced this section to a few sentences. Our intent is to alert readers to the opportunity that Southern hemisphere  $^{14}\text{CO}_2$  observations give to understanding Southern Ocean carbon cycling.

**L571. Change 'natural' to 'mass-dependent'?**

Done.

**L650. Perhaps acknowledge Scott Lehman and Ingeborg Levin for providing unpublished data.**

Acknowledgement added. Although we use only published data, they still generously provided the datasets for us to use.

**Table 2. WLG is already taken as a site code (for Mt. Waliguan Observatory, China), at least with respect to the WMO GAW program. Wouldn't MAK and BHD work here?**

We have changed to use BHD for the overall site code, recognizing that the early part of the record is actually from Makara. However, we want to keep a consistent overall site code so that users are not forced to stitch the two sites together themselves. Another reviewer

raised the same comment.

**Figure 2. Can you distinguish the symbols and/or colors for the two versions of the EN-Tandem: i.e. 12,13,14 vs. 13,14, since the results seemed to be significantly different.**

Done.
